# Supplementary material for: Miro1-dependent mitochondrial dynamics in parvalbumin interneurons
Source: eLife. 2021 Jun 30;10:e65215. doi: 10.7554/eLife.65215 (PMC8294849; doi:10.7554/eLife.65215)
Supplement: Figure 1—figure supplement 1—source data 1. [file elife-65215-fig1-figsupp1-data1.xlsx]

## Sheet: Fig1 FigSup1C
Figure 1 Figure Supplement 1C - Cell Numbers
WT	HET	KO		Shapiro-Wilk test					Ordinary one-way anova							Ordinary one-way anova
Miro1(+/+)	Miro1(+/Δ)	Miro1(Δ/Δ)		W	0.854	0.8933	0.9277		Table Analyzed	cell numbers						Number of comparisons per family	3
100.5	100.5	95		P value	0.2394	0.2921	0.4952		Data sets analyzed	A-C						Alpha	0.05
77.5	83	90		Passed normality test (alpha=0.05)?	Yes	Yes	Yes
86	100	102.5		P value summary	ns	ns	ns		ANOVA summary							Tukey's multiple comparisons test	Mean Diff.	95.00% CI of diff.	Significant?	Summary	Adjusted P Value
77	73.5	68							F	0.6651						Miro1(+/+) vs. Miro1(+/Δ)	9.536	-24.11 to 43.18	No	ns	0.7488	A-B
	49	65							P value	0.5279						Miro1(+/+) vs. Miro1(Δ/Δ)	14.69	-18.18 to 47.56	No	ns	0.4969	A-C
	48	43			Miro1(+/+)	Miro1(+/Δ)	Miro1(Δ/Δ)		P value summary	ns						Miro1(+/Δ) vs. Miro1(Δ/Δ)	5.152	-22.63 to 32.93	No	ns	0.8823	B-C
	76	40		Number of values	4	7	8		Significant diff. among means (P < 0.05)?	No
		61							R squared	0.07676						Test details	Mean 1	Mean 2	Mean Diff.	SE of diff.	n1	n2	q	DF
				Minimum	77	48	40									Miro1(+/+) vs. Miro1(+/Δ)	85.25	75.71	9.536	13.04	4	7	1.034	16
				Maximum	100.5	100.5	102.5		Brown-Forsythe test							Miro1(+/+) vs. Miro1(Δ/Δ)	85.25	70.56	14.69	12.74	4	8	1.631	16
				Range	23.5	52.5	62.5		F (DFn, DFd)	0.9932 (2, 16)						Miro1(+/Δ) vs. Miro1(Δ/Δ)	75.71	70.56	5.152	10.77	7	8	0.6768	16
									P value	0.3921
				Mean	85.25	75.71	70.56		P value summary	ns
				Std. Deviation	10.97	21.39	23.35		Are SDs significantly different (P < 0.05)?	No
				Std. Error of Mean	5.487	8.083	8.257
									Bartlett's test
									Bartlett's statistic (corrected)	1.718
									P value	0.4236
									P value summary	ns
									Are SDs significantly different (P < 0.05)?	No
									ANOVA table	SS	DF	MS	F (DFn, DFd)	P value
									Treatment (between columns)	575.6	2	287.8	F (2, 16) = 0.6651	P=0.5279
									Residual (within columns)	6923	16	432.7
									Total	7498	18
									Data summary
									Number of treatments (columns)	3
									Number of values (total)	19

## Sheet: Fig1 FigSup1D
Figure 1 Figure Supplement 1D - Rhot1 intensity
HET	KO				HET	KO				Miro1(+/Δ)	Miro1(Δ/Δ)		Mann Whitney Test
Miro1(+/Δ)	Miro1(Δ/Δ)			Bin Center	Miro1(+/Δ)	Miro1(Δ/Δ)			Number of values	109	108		Table Analyzed	Rhot1 Intensity
1847.41	590.408			100	0	0.00925926
1349.76	620.899			200	0.0183486	0.037037			Minimum	206.8	148.7		Column B	Miro1(Δ/Δ)
833.335	625.579			300	0.0275229	0.25			25% Percentile	616.8	346.5		vs.	vs.
1440.53	541.478			400	0.0917431	0.453704			Median	764.8	480.7		Column A	Miro1(+/Δ)
1024.95	605.852			500	0.192661	0.611111			75% Percentile	1029	645.6
1145.69	630.758			600	0.321101	0.75			Maximum	1875	1039		Mann Whitney test
1121.72	539.755			700	0.46789	0.851852							P value	<0.0001
726.634	745.908			800	0.577982	0.898148			Mean	843.6	517.6		Exact or approximate P value?	Approximate
714.446	519.892			900	0.651376	0.953704			Std. Deviation	342.2	212.6		P value summary	****
1098.02	830.221			1000	0.770642	1			Std. Error of Mean	32.78	20.45		Significantly different (P < 0.05)?	Yes
1061.71	728.796			1100	0.844037	1							One- or two-tailed P value?	Two-tailed
1318.26	785.44			1200	0.853211	1			Lower 95% CI of mean	778.6	477		Sum of ranks in column A,B	15360 , 8293
1273.2	625.849			1300	0.917431	1			Upper 95% CI of mean	908.6	558.1		Mann-Whitney U	2407
876.926	720.88			1400	0.944954	1
1002.79	1034.22			1500	0.972477	1			Sum	91954	55898		Difference between medians
851.326	599.838			1600	0.972477	1							Median of column A	764.8, n=109
445.242	710.461			1700	0.972477	1			D'Agostino & Pearson normality test				Median of column B	480.7, n=108
375.358	871.658			1800	0.990826	1			K2	11.78	7.729		Difference: Actual	-284.1
671.158	192.263			1900	1	1			P value	0.0028	0.021		Difference: Hodges-Lehmann	-297.3
1284.77	381.695								Passed normality test (alpha=0.05)?	No	No
1105.9	357.631								P value summary	**	*
614.108	263.317
932.37	297.006								Shapiro-Wilk normality test
868.542	290.968								W	0.9557	0.9498
1306.19	333.563								P value	0.0011	0.0005
1761.16	391.91								Passed normality test (alpha=0.05)?	No	No
696.236	467.984								P value summary	**	***
1033.74	577.838
796.402	470.157
1437.16	212.421
749.1	469.001
669.963	500.389
1306.35	342.816
960.734	259.544
1875.27	339.164
1537.81	250.393
660.347	396.469
632.347	280.52
1312.85	317.837
533.023	308.049
596.274	405.296
1465.5	457.845
898.935	440.674
1201.06	456.439
638.271	439.981
1511.61	362.093
1440.42	500.325
803.459	373.168
995.042	440.941
668.96	372.789
954.417	282.742
451.937	290.33
496.757	315.201
691.507	224.601
419.12	336.37
550.084	557.553
715.967	502.109
362.366	556.663
372.772	523.203
797.624	439.365
965.154	254.978
623.622	280.67
509.704	148.667
230.852	392.48
566.423	296.309
585.563	380.703
750.53	385.155
641.566	258.538
490.632	293.922
543.105	371.954
499.612	409.398
206.757	304.152
595.649	361.036
509.016	442.33
881.504	882.674
764.786	824.821
980.604	991.073
835.926	927.417
700.342	871.137
807.165	821.174
867.35	665.771
704.511	717.253
947.136	957.921
1042.28	404.854
372.573	896.79
1088.96	1039.16
1077.28	690.767
737.198	535.62
479.381	800.208
847.789	557.014
692.573	491.199
698.899	722.108
957.339	412.628
623.867	597.103
835.349	554.022
619.555	538.687
699.309	730.507
1107.58	520.988
638.299	324.482
336.342	601.034
1010.19	973.683
753.172	650.593
1007.58	516.092
545.629	293.772
417.797	686.781
755.463	870.92
969.177	574.424
641.862	368.371
505.777
