# Supplementary material for: Miro1-dependent mitochondrial dynamics in parvalbumin interneurons
Source: eLife. 2021 Jun 30;10:e65215. doi: 10.7554/eLife.65215 (PMC8294849; doi:10.7554/eLife.65215)
Supplement: Figure 1—source data 1. [file elife-65215-fig1-data1.xlsx]

## Sheet: Figure 1A
Figure 1A - COX-IV Fluorescent Integrated Intensity per 100 μm^2 (a.u.)
PV-	PV+		Bin Center	PV-	PV+			PV-	PV+		Table Analyzed	Fig1A COX4		Table Analyzed	Fig1A COX4
2617764	4235408		1000000	0.037037	0		Number of values	81	81
1937096	2717427		1500000	0.135802	0.0493827						Column B	PV+		Column A	PV-
2282885	2776184		2000000	0.345679	0.148148		Minimum	1005377	1317948		vs.	vs.		vs.	vs.
1761411	2888666		2500000	0.530864	0.259259		25% Percentile	1931788	2717502		Column A	PV-		Column B	PV+
2211114	3128951		3000000	0.691358	0.45679		Median	2617764	3371515
4623209	5878537		3500000	0.864198	0.592593		75% Percentile	3442009	4482818		Mann Whitney test			Kolmogorov-Smirnov test
2976934	2654416		4000000	0.901235	0.703704		Maximum	6403710	6261971		P value	<0.0001		P value	0.0002
1947223	2656852		4500000	0.950617	0.82716						Exact or approximate P value?	Exact		Exact or approximate P value?	Approximate
3427352	3018332		5000000	0.950617	0.901235		Mean	2818168	3555384		P value summary	****		P value summary	***
2716458	2836014		5500000	0.975309	0.950617		Std. Deviation	1132728	1194740		Significantly different (P < 0.05)?	Yes		Significantly different (P < 0.05)?	Yes
2865569	3536579		6000000	0.987654	0.987654		Std. Error of Mean	125859	132749		One- or two-tailed P value?	Two-tailed		Kolmogorov-Smirnov D	0.3333
1919486	2934390		6500000	1	1						Sum of ranks in column A,B	5382 , 7821
3380524	4658357						Lower 95% CI of mean	2567701	3291205		Mann-Whitney U	2061
2522731	2643413						Upper 95% CI of mean	3068635	3819563
3525685	3371515										Difference between medians
3027024	2841023						Sum	228271610	287986114		Median of column A	2617764, n=81
3559519	3043071										Median of column B	3371515, n=81
4190323	5458773						D'Agostino & Pearson normality test				Difference: Actual	753751
2622938	3570978						K2	15.34	3.168		Difference: Hodges-Lehmann	770819
2829194	3326826						P value	0.0005	0.2052
1402001	1576065						Passed normality test (alpha=0.05)?	No	Yes
1666853	2361859						P value summary	***	ns
5615607	5137192
1005377	1642706						Shapiro-Wilk normality test
1579624	1958452						W	0.934	0.9775
1039791	1317948						P value	0.0004	0.1636
4581101	4548479						Passed normality test (alpha=0.05)?	No	Yes
2379071	3684854						P value summary	***	ns
1818782	3215816
2891504	3924860
1890419	2210193
1874938	1834035
1907555	2192179
2548894	3014089
2943819	3170393
2834936	4458809
2346821	4098093
2246558	2898120
3470690	4372066
2343625	2717577
2237534	1997789
2438761	2315527
1926480	1972597
1452006	1337260
3685433	4779311
1013599	4004268
2392068	3508179
1860601	2861312
1399384	2509207
2588347	3985746
3318643	3406866
3709923	5394028
2964001	4833884
2893607	5743861
1536542	4567869
3195901	3531504
2255952	4506827
2195690	3116910
1547959	2030789
1919114	3793291
2509292	2908230
2146533	2823316
2014966	3288621
6079072	6125061
4227823	4610942
2392063	2645237
2940381	3270999
2790036	3755229
4234867	5566124
3442344	4943377
3669913	4672401
3441674	4261887
5666888	5832011
4725832	5061838
6403710	6261971
3561898	4360816
3705638	3715363
1696741	2239647
3335690	3867578
4486691	5230365
2935608	3838579

## Sheet: Figure 1C
Figurer 1C - % of mitochondria moving
WT	HET	KO		Table Analyzed	Fig1C % mito moving						Number of families	1
Miro1(+/+)	Miro1(+/Δ)	Miro1(Δ/Δ)		Data sets analyzed	A-C						Number of comparisons per family	3
27.2727	11.1111	0									Alpha	0.05
40	10	0		ANOVA summary
42.8571	13.3333	0		F	9.107						Tukey's multiple comparisons test	Mean Diff.	95.00% CI of diff.	Below threshold?	Summary	Adjusted P Value
14.2857	37.5	0		P value	0.0003						Miro1(+/+) vs. Miro1(+/Δ)	1.213	-7.391 to 9.816	No	ns	0.939	A-B
10.5263	18.1818	0		P value summary	***						Miro1(+/+) vs. Miro1(Δ/Δ)	13.36	4.248 to 22.47	Yes	**	0.0023	A-C
14.2857	5.55556	10		Significant diff. among means (P < 0.05)?	Yes						Miro1(+/Δ) vs. Miro1(Δ/Δ)	12.14	4.508 to 19.78	Yes	***	0.0009	B-C
20	17.3913	23.5294		R squared	0.2215
25	42.8571	20									Test details	Mean 1	Mean 2	Mean Diff.	SE of diff.	n1	n2	q	DF
27.7778	23.5294	33.3333		Brown-Forsythe test							Miro1(+/+) vs. Miro1(+/Δ)	22.29	21.08	1.213	3.586	15	30	0.4783	64
22.2222	20	0		F (DFn, DFd)	0.07906 (2, 64)						Miro1(+/+) vs. Miro1(Δ/Δ)	22.29	8.932	13.36	3.797	15	22	4.975	64
14.2857	11.1111	12.5		P value	0.9241						Miro1(+/Δ) vs. Miro1(Δ/Δ)	21.08	8.932	12.14	3.183	30	22	5.397	64
30	18.1818	0		P value summary	ns
16.6667	27.7778	30		Are SDs significantly different (P < 0.05)?	No
12.5	21.4286	0
16.6667	23.5294	7.14286		Bartlett's test
	18.1818	0		Bartlett's statistic (corrected)	0.6495
	15	16.6667		P value	0.7227
	6.66667	0		P value summary	ns
	13.6364	0		Are SDs significantly different (P < 0.05)?	No
	25	0
	14.2857	33.3333		ANOVA table	SS	DF	MS	F (DFn, DFd)	P value
	42.8571	10		Treatment (between columns)	2342	2	1171	F (2, 64) = 9.107	P=0.0003
	27.2727			Residual (within columns)	8228	64	128.6
	20			Total	10570	66
	30
	45.4545			Data summary
	0			Number of treatments (columns)	3
	14.2857			Number of values (total)	67
	18.1818
	40

## Sheet: Figure 1D
Figure 1D - Median velocity of moving mitochondria (μm/s)
WT	HET	KO		Table Analyzed	Fig1D % median velocity						Number of families	1
Miro1(+/+)	Miro1(+/Δ)	Miro1(Δ/Δ)		Data sets analyzed	A-C						Number of comparisons per family	3
0.095	0.1315	0.204									Alpha	0.05
0.163	0.125	0.134		ANOVA summary
0.146	0.181	0.103		F	1.389						Tukey's multiple comparisons test	Mean Diff.	95.00% CI of diff.	Below threshold?	Summary	Adjusted P Value
0.121	0.133	0.154		P value	0.2534						Miro1(+/+) vs. Miro1(+/Δ)	0.02635	-0.01157 to 0.06426	No	ns	0.2293	A-B
0.113	0.158	0.163		P value summary	ns						Miro1(+/+) vs. Miro1(Δ/Δ)	0.02144	-0.02776 to 0.07064	No	ns	0.5568	A-C
0.1325	0.359	0.11		Significant diff. among means (P < 0.05)?	No						Miro1(+/Δ) vs. Miro1(Δ/Δ)	-0.004903	-0.04951 to 0.03970	No	ns	0.9632	B-C
0.119	0.252	0.1115		R squared	0.02281
0.126	0.185	0.133									Test details	Mean 1	Mean 2	Mean Diff.	SE of diff.	n1	n2	q	DF
0.0955	0.168	0.092		Brown-Forsythe test							Miro1(+/+) vs. Miro1(+/Δ)	0.1662	0.1399	0.02635	0.01597	35	65	2.332	119
0.1685	0.1365	0.106		F (DFn, DFd)	0.5430 (2, 119)						Miro1(+/+) vs. Miro1(Δ/Δ)	0.1662	0.1448	0.02144	0.02073	35	22	1.463	119
0.141	0.151	0.0955		P value	0.5824						Miro1(+/Δ) vs. Miro1(Δ/Δ)	0.1399	0.1448	-0.004903	0.01879	65	22	0.369	119
0.137	0.155	0.093		P value summary	ns
0.16	0.124	0.0995		Are SDs significantly different (P < 0.05)?	No
0.1015	0.096	0.08
0.1315	0.121	0.124		Bartlett's test
0.1305	0.099	0.1475		Bartlett's statistic (corrected)	19.51
0.118	0.0855	0.119		P value	<0.0001
0.101	0.087	0.425		P value summary	****
0.1495	0.155	0.242		Are SDs significantly different (P < 0.05)?	Yes
0.103	0.17	0.152
0.125	0.132	0.1895		ANOVA table	SS	DF	MS	F (DFn, DFd)	P value
0.154	0.153	0.1075		Treatment (between columns)	0.01613	2	0.008063	F (2, 119) = 1.389	P=0.2534
0.11	0.124			Residual (within columns)	0.6909	119	0.005806
0.1215	0.079			Total	0.707	121
0.1455	0.111
0.4775	0.134			Data summary
0.547	0.0815			Number of treatments (columns)	3
0.395	0.1135			Number of values (total)	122
0.336	0.151
0.081	0.188
0.17	0.122
0.153	0.109
0.142	0.141
0.1655	0.075
0.142	0.066
	0.137
	0.136
	0.0795
	0.064
	0.12
	0.121
	0.1975
	0.16
	0.238
	0.19
	0.238
	0.132
	0.1
	0.128
	0.088
	0.1175
	0.168
	0.204
	0.268
	0.064
	0.277
	0.111
	0.114
	0.1115
	0.1075
	0.097
	0.13
	0.1285
	0.075
	0.137

## Sheet: Figure 1E
Figure 1E - Distance travelled by moving mitochondria (μm)
WT	HET	KO		Table Analyzed	Fig1E Distance Travelled						Number of families	1
Miro1(+/+)	Miro1(+/Δ)	Miro1(Δ/Δ)		Data sets analyzed	A-C						Number of comparisons per family	3
43.372	49.222	77.661									Alpha	0.05
76.745	58.456	46.058		ANOVA summary
61.59	37.905	36.346		F	7.727						Tukey's multiple comparisons test	Mean Diff.	95.00% CI of diff.	Below threshold?	Summary	Adjusted P Value
33.663	53.007	37.699		P value	0.0007						Miro1(+/+) vs. Miro1(+/Δ)	16.35	6.466 to 26.23	Yes	***	0.0004	A-B
40.179	60.106	54.683		P value summary	***						Miro1(+/+) vs. Miro1(Δ/Δ)	11.9	-0.7578 to 24.55	No	ns	0.0701	A-C
51.562	30.298	39.616		Significant diff. among means (P < 0.05)?	Yes						Miro1(+/Δ) vs. Miro1(Δ/Δ)	-4.454	-15.63 to 6.722	No	ns	0.6123	B-C
64.174	83.589	43.756		R squared	0.1176
53.737	10.916	35.663									Test details	Mean 1	Mean 2	Mean Diff.	SE of diff.	n1	n2	q	DF
33.602	81.112	18.982		Brown-Forsythe test							Miro1(+/+) vs. Miro1(+/Δ)	46.72	30.37	16.35	4.163	31	66	5.554	116
68.853	56.838	34.873		F (DFn, DFd)	6.486 (2, 116)						Miro1(+/+) vs. Miro1(Δ/Δ)	46.72	34.82	11.9	5.33	31	22	3.157	116
59.688	76.572	38.588		P value	0.0021						Miro1(+/Δ) vs. Miro1(Δ/Δ)	30.37	34.82	-4.454	4.707	66	22	1.338	116
48.39	67.663	30.497		P value summary	**
41.678	41.086	29.355		Are SDs significantly different (P < 0.05)?	Yes
23.816	52.36	25.138
42.798	57.381	46.099		Bartlett's test
55.213	47.461	50.625		Bartlett's statistic (corrected)	13.17
48.829	37.115	60.77		P value	0.0014
37.865	36.252	9.975		P value summary	**
38.783	60.343	19.618		Are SDs significantly different (P < 0.05)?	Yes
37.167	68.943	11.107
44.756	53.339	8.054		ANOVA table	SS	DF	MS	F (DFn, DFd)	P value
53.632	66.275	10.867		Treatment (between columns)	5649	2	2825	F (2, 116) = 7.727	P=0.0007
50.329	44.188			Residual (within columns)	42406	116	365.6
42.444	22.771			Total	48056	118
32.36	43.332
30.629	36.172			Data summary
44.148	20.743			Number of treatments (columns)	3
59.674	39.281			Number of values (total)	119
41.759	50.549
45.008	40.925
41.759	28.669
	25.35
	15.376
	10.365
	5.879
	6.91
	8.091
	6.087
	7.977
	17.411
	10.661
	14.744
	21.58
	22.158
	10.488
	48.351
	16.129
	11.641
	16.286
	17.37
	15.31
	29.943
	28.393
	7.09
	11.831
	9.749
	12.854
	15.86
	8.985
	7.334
	7.597
	7.411
	12.695
	6.982
	9.951
	6.44
