# Supplementary material for: Miro1-dependent mitochondrial dynamics in parvalbumin interneurons
Source: eLife. 2021 Jun 30;10:e65215. doi: 10.7554/eLife.65215 (PMC8294849; doi:10.7554/eLife.65215)
Supplement: Figure 2—source data 1. [file elife-65215-fig2-data1.xlsx]

## Sheet: Figure 2B
Figure 2B - % cells that contain MitoDendra+ mitochondrial clusters
HET	KO			Miro1(+/Δ)	Miro1(Δ/Δ)		Table Analyzed	Fig2B % cells with mito clusters
Miro1(+/Δ)	Miro1(Δ/Δ)		Number of values	8	8
5.55556	77.7778						Column B	Miro1(Δ/Δ)
15	44.4444		Minimum	0	33.33		vs.	vs.
13.3333	69.5238		25% Percentile	4.96	45.83		Column A	Miro1(+/Δ)
29.1667	77.7778		Median	9.167	54.4
10	50		75% Percentile	14.58	75.71		Unpaired t test
0	56.9444		Maximum	29.17	77.78		P value	<0.0001
8.33333	33.3333						P value summary	****
4.7619	51.8518		Mean	10.77	57.71		Significantly different (P < 0.05)?	Yes
			Std. Deviation	8.854	16.08		One- or two-tailed P value?	Two-tailed
			Std. Error of Mean	3.13	5.684		t, df	t=7.233, df=14
			Lower 95% CI of mean	3.367	44.27		How big is the difference?
			Upper 95% CI of mean	18.17	71.15		Mean of column A	10.77
							Mean of column B	57.71
			Sum	86.15	461.7		Difference between means (B - A) ± SEM	46.94 ± 6.489
							95% confidence interval	33.02 to 60.86
			D'Agostino & Pearson normality test				R squared (eta squared)	0.7889
			K2	5.163	0.5883
			P value	0.0756	0.7452		F test to compare variances
			Passed normality test (alpha=0.05)?	Yes	Yes		F, DFn, Dfd	3.298, 7, 7
			P value summary	ns	ns		P value	0.1381
							P value summary	ns
			Shapiro-Wilk normality test				Significantly different (P < 0.05)?	No
			W	0.9097	0.9354
			P value	0.352	0.5663		Data analyzed
			Passed normality test (alpha=0.05)?	Yes	Yes		Sample size, column A	8
			P value summary	ns	ns		Sample size, column B	8

## Sheet: Figure 2C
Figure 2C - % of mitochondrial to soma area
HET	KO			Miro1(+/Δ)	Miro1(Δ/Δ)		Table Analyzed	Fig2C % mito/soma ratio
Miro1(+/Δ)	Miro1(Δ/Δ)		Number of values	8	8
40.6934	27.4808						Column B	Miro1(Δ/Δ)
36.7687	27.8796		Minimum	35.61	23.69		vs.	vs.
43.4635	26.0182		25% Percentile	36.46	25.76		Column A	Miro1(+/Δ)
41.3252	31.2996		Median	40.33	27.68
35.608	31.4822		75% Percentile	41.31	30.75		Unpaired t test
39.969	25.6743		Maximum	43.46	31.48		P value	<0.0001
41.2637	29.097						P value summary	****
36.3637	23.6853		Mean	39.43	27.83		Significantly different (P < 0.05)?	Yes
			Std. Deviation	2.834	2.731		One- or two-tailed P value?	Two-tailed
			Std. Error of Mean	1.002	0.9656		t, df	t=8.340, df=14
			Lower 95% CI of mean	37.06	25.54		How big is the difference?
			Upper 95% CI of mean	41.8	30.11		Mean of column A	39.43
							Mean of column B	27.83
			Sum	315.5	222.6		Difference between means (B - A) ± SEM	-11.60 ± 1.391
							95% confidence interval	-14.59 to -8.621
			D'Agostino & Pearson normality test				R squared (eta squared)	0.8325
			K2	1.294	0.2774
			P value	0.5236	0.8705		F test to compare variances
			Passed normality test (alpha=0.05)?	Yes	Yes		F, DFn, Dfd	1.076, 7, 7
			P value summary	ns	ns		P value	0.9252
							P value summary	ns
			Shapiro-Wilk normality test				Significantly different (P < 0.05)?	No
			W	0.9097	0.9542
			P value	0.3521	0.7534		Data analyzed
			Passed normality test (alpha=0.05)?	Yes	Yes		Sample size, column A	8
			P value summary	ns	ns		Sample size, column B	8

## Sheet: Figure 2G
Figure 2G - % of biocytin-filled boutons that contain MitoDendra+ mitochondria
WT	KO			Miro1(+/+)	Miro1(Δ/Δ)		Table Analyzed	Fig2G %bouton with mito
Miro1(+/+)	Miro1(Δ/Δ)		Number of values	5	7
59.3413	61.7708						Column B	Miro1(Δ/Δ)
83.792	46.3761		Minimum	59.34	38.7		vs.	vs.
75.174	65.0074		25% Percentile	65.77	38.75		Column A	Miro1(+/+)
78.7613	38.7529		Median	75.17	49.61
72.207	55.7171		75% Percentile	81.28	61.77		Unpaired t test
	49.6104		Maximum	83.79	65.01		P value	0.0028
	38.7026						P value summary	**
			Mean	73.86	50.85		Significantly different (P < 0.05)?	Yes
			Std. Deviation	9.191	10.48		One- or two-tailed P value?	Two-tailed
			Std. Error of Mean	4.11	3.961		t, df	t=3.936, df=10
			Lower 95% CI of mean	62.44	41.16		How big is the difference?
			Upper 95% CI of mean	85.27	60.54		Mean of column A	73.86
							Mean of column B	50.85
			Sum	369.3	355.9		Difference between means (B - A) ± SEM	-23.01 ± 5.846
							95% confidence interval	-36.03 to -9.981
			D'Agostino & Pearson normality test				R squared (eta squared)	0.6077
			K2	N too small	N too small
			P value				F test to compare variances
			Passed normality test (alpha=0.05)?				F, DFn, Dfd	1.300, 6, 4
			P value summary				P value	0.835
							P value summary	ns
			Shapiro-Wilk normality test				Significantly different (P < 0.05)?	No
			W	0.9411	0.9248
			P value	0.6736	0.5076		Data analyzed
			Passed normality test (alpha=0.05)?	Yes	Yes		Sample size, column A	5
			P value summary	ns	ns		Sample size, column B	7

## Sheet: Figure 2H
Figure 2H - Bouton Occupancy per 10 μm of axonal length
WT	KO			Miro1(+/+)	Miro1(Δ/Δ)		Table Analyzed	Fig2H bouton per 10 um
Miro1(+/+)	Miro1(Δ/Δ)		Number of values	5	7
3.2735	2.0942						Column B	Miro1(Δ/Δ)
2.24637	2.72229		Minimum	2.246	2.094		vs.	vs.
2.75689	2.7947		Maximum	4.043	3.506		Column A	Miro1(+/+)
2.37268	3.50624		Range	1.797	1.412
4.04291	2.98031						Unpaired t test
	3.29685		Mean	2.938	2.867		P value	0.8395
	2.67552		Std. Deviation	0.7355	0.4594		P value summary	ns
			Std. Error of Mean	0.3289	0.1736		Significantly different (P < 0.05)?	No
							One- or two-tailed P value?	Two-tailed
			Shapiro-Wilk test				t, df	t=0.2079, df=10
			W	0.9206	0.9635
			P value	0.5337	0.8477		How big is the difference?
			Passed normality test (alpha=0.05)?	Yes	Yes		Mean of column A	2.938
			P value summary	ns	ns		Mean of column B	2.867
							Difference between means (B - A) ± SEM	-0.07131 ± 0.3429
			Kolmogorov-Smirnov test				95% confidence interval	-0.8354 to 0.6928
			KS distance	0.1975	0.1954		R squared (eta squared)	0.004305
			P value	>0.1000	>0.1000
			Passed normality test (alpha=0.05)?	Yes	Yes		F test to compare variances
			P value summary	ns	ns		F, DFn, Dfd	2.564, 4, 6
							P value	0.291
			Number of values	5	7		P value summary	ns
							Significantly different (P < 0.05)?	No
							Data analyzed
							Sample size, column A	5
							Sample size, column B	7

## Sheet: Figure 2I
Figure 2I - Mean bouton size (μm^2)
WT	KO			Miro1(+/+)	Miro1(Δ/Δ)		Table Analyzed	Fig2I bouton size
Miro1(+/+)	Miro1(Δ/Δ)		Number of values	6	7
1.11555	0.664566						Column B	Miro1(Δ/Δ)
0.923	0.933247		Minimum	0.6907	0.6646		vs.	vs.
1.12156	0.946272		25% Percentile	0.73	0.9004		Column A	Miro1(+/+)
0.690723	0.900373		Median	0.888	0.9463
0.743076	1.1965		75% Percentile	1.117	1.196		Unpaired t test
0.852999	1.34673		Maximum	1.122	1.347		P value	0.4067
	1.05217						P value summary	ns
			Mean	0.9078	1.006		Significantly different (P < 0.05)?	No
			Std. Deviation	0.1824	0.2203		One- or two-tailed P value?	Two-tailed
			Std. Error of Mean	0.07446	0.08325		t, df	t=0.8627, df=11
			Lower 95% CI of mean	0.7164	0.802		How big is the difference?
			Upper 95% CI of mean	1.099	1.209		Mean of column A	0.9078
							Mean of column B	1.006
			Sum	5.447	7.04		Difference between means (B - A) ± SEM	0.09788 ± 0.1135
							95% confidence interval	-0.1518 to 0.3476
							R squared (eta squared)	0.06337
			Shapiro-Wilk normality test
			W	0.9039	0.9707		F test to compare variances
			P value	0.3972	0.9032		F, DFn, Dfd	1.458, 6, 5
			Passed normality test (alpha=0.05)?	Yes	Yes		P value	0.6957
			P value summary	ns	ns		P value summary	ns
							Significantly different (P < 0.05)?	No
							Data analyzed
							Sample size, column A	6
							Sample size, column B	7

## Sheet: Figure 2J
Figure 2J - Mean MitoDendra Flurescent intensity within biocytin-filled bouton
WT	KO
Miro1(+/+)	Miro1(Δ/Δ)		Bin Center	Miro1(+/+)	Miro1(Δ/Δ)			Miro1(+/+)	Miro1(Δ/Δ)		Table Analyzed	Fig2J MitoDendra in Boutons		Table Analyzed	Fig2J MitoDendra in Boutons Histogram
13.089	0.482		0	0.0772358	0.213873		Total number of values	246	173
13.767	1.703		5	0.288618	0.572254		Number of excluded values	0	0		Column B	Miro1(Δ/Δ)		Column A	Miro1(+/+)
7.354	3.543		10	0.418699	0.693642		Number of binned values	246	173		vs.	vs.		vs.	vs.
11.758	2.719		15	0.617886	0.82659						Column A	Miro1(+/+)		Column B	Miro1(Δ/Δ)
12.048	0.674		20	0.784553	0.907515		Minimum	0.415	0.061
7.879	3.602		25	0.890244	0.976879		25% Percentile	7.00225	3.148		Mann Whitney test			Kolmogorov-Smirnov test
10.149	5.321		30	0.939024	1		Median	14.8795	6.632		P value	< 0.0001		P value	<0.0001
3.576	1.284		35	0.971545	1		75% Percentile	21.1627	14.912		Exact or approximate P value?	Approximate		Exact or approximate P value?	Approximate
2.48	2.287		40	0.987805	1		Maximum	53.057	30.077		P value summary	****		P value summary	****
6.316	0.307		45	0.995935	1						Significantly different? (P < 0.05)	Yes		Significantly different (P < 0.05)?	Yes
7.38	2.641		50	0.995935	1		Mean	15.1894	9.1934		One- or two-tailed P value?	Two-tailed		Kolmogorov-Smirnov D	0.3144
3.5	1.131		55	1	1		Std. Deviation	9.99252	7.91973		Sum of ranks in column A,B	59451 , 28539
6.92	0.948						Std. Error of Mean	0.6371	0.602126		Mann-Whitney U	13488
7.347	0.363
13.086	7						Lower 95% CI of mean	13.9345	8.0049		Difference between medians
9.745	7.829						Upper 95% CI of mean	16.4443	10.3819		Median of column A	14.88, n=246
7.024	4.781										Median of column B	6.632, n=173
7.319	5.744										Difference: Actual	-8.248
16.482	3.611										Difference: Hodges-Lehmann	-5.632
18.485	3.766							Miro1(+/+)	Miro1(Δ/Δ)
20.573	7.533						Test for normal distribution
15.405	1.649						Anderson-Darling test
15.219	10.113						A2*	1.954	6.388
30.113	5.76						P value	<0.0001	<0.0001
4.849	4.819						Passed normality test (alpha=0.05)?	No	No
4	5.587						P value summary	****	****
14.893	6.753
29.776	3.228						D'Agostino & Pearson test
6.857	0.794						K2	19.92	19.58
16.066	6.973						P value	<0.0001	<0.0001
31.389	0.481						Passed normality test (alpha=0.05)?	No	No
20.026	8.282						P value summary	****	****
34.615	11.927
21.929	3.623						Shapiro-Wilk test
7.226	6.948						W	0.9564	0.89
7.433	1.337						P value	<0.0001	<0.0001
3.18	6.93						Passed normality test (alpha=0.05)?	No	No
2.644	13.153						P value summary	****	****
4.086	10.369
7.591	15.06						Kolmogorov-Smirnov test
9.707	10.447						KS distance	0.06963	0.1712
6.575	4.801						P value	0.0057	<0.0001
11.214	5.355						Passed normality test (alpha=0.05)?	No	No
2.588	5.041						P value summary	**	****
32.566	1.393
13.923	4.725						Number of values	246	173
0.575	1.592
8.204	2.75
16.685	2.036
4.719	3.699
21.204	3.092
4.859	3.436
21.171	0.276
18.817	3.204
14.866	1.193
16.281	8.081
27.52	3.939
26.067	1.651
19.803	4.913
18.673	6.354
16.983	1.637
25.849	2.2
26.013	0.27
12.629	6.574
14.935	0.364
8.826	1.101
7.484	4.151
20.486	3.042
16.014	0.588
16.16	0.588
7.375	0.436
4.088	6.875
11.012	2.767
1.762	0.061
21.046	0.095
34.649	3.78
17.135	1.433
4.147	1.689
39.54	4.229
4.828	4.748
3.529	0.253
21.99	4.016
20.621	8.527
13.337	3.238
17.169	5.713
5.082	1.967
22.556	3.711
6.937	0.318
20.003	7.883
21.16	7.403
13.522	6.189
12.791	30.077
20.182	6.632
10.159	10.536
9.173	18.684
23.136	4.029
8.619	1.288
5.459
11.781	13.677
23.095	13.259
26.351	2.118
45.237	22.655
19.755	15.965
21.352
9.295	26.017
23.465	13.734
13.194	29.158
14.521
16.173	14.847
19.492	28.407
19.22	9.914
18.249	6.236
29.162	22.715
15.269	13.684
15.839	7.09
4.98	23.615
34.845	24.031
23.351
12.141	20.898
22.284
6.142	26.653
23.513	16.934
23.565	14.977
22.481	12.177
16.718	16.259
3.149	10.66
19.428	18.789
11.986	11.13
10.574	19.956
2.644	13.664
5.614	3.991
41.268	6.383
33.984	1.544
16.257	15.37
20.013	12.424
20.884	17.64
53.057	26.357
14.722	20.357
7.464	6.864
31.353	8.058
18.469	4.874
22.207	27.268
15.72	15.003
13.521	6.636
18.678	23.066
4.676	15.121
1.775	29.205
38.706
27.497	15.015
0.66	18.103
1.42	6.632
36.262	21.87
15.216	12.199
15.398	22.141
23.768	8.082
25.896	5.37
24.646
29.854
3.667
1.854
2.061
18.196
28.871	27.368
23.521
3.474
13.59	18.892
18.514
3.053	6.172
13.201	15.535
10.098	10.482
0.597	17.317
5.286	12.176
3.745	20.804
2.305	13.7
15.154	13.487
0.812	20.198
8.148	13.056
11.311	5.183
6.074	16.833
4.58	25.368
2.669	6.704
4.194	23.661
10.301	20.391
17.124	4.134
15.469	3.281
0.879	16.039
5.699	20.268
4.444	4.493
0.415
37.632
45.327
10.832
17.272
33.211
17.558
27.112
3.548
32.32
26.63
28.322
30.112
10.071
20.925
14.773
22.921
17.157
0.99
15.811
9.815
9.372
4.598
2.542
18.898
32.721
23.482
23.84
20.045
13.681
21.119
6.342
1.385
19.007
11.179
10.375
1.293
25.046
27.845
25.806
1.462
17.523
24.108
25.269
18.866
23.432
17.722
10.137
10.756
1.077
13.479
17.737
16.646
1.052
8.516
12.719
17.149
14.514
