# Supplementary material for: Miro1-dependent mitochondrial dynamics in parvalbumin interneurons
Source: eLife. 2021 Jun 30;10:e65215. doi: 10.7554/eLife.65215 (PMC8294849; doi:10.7554/eLife.65215)
Supplement: Figure 3—source data 1. [file elife-65215-fig3-data1.xlsx]

## Sheet: Figure 3B
Figure 3B - Length of Dendritic and Axonal Compartments in Parvalbumin Interneurons (μm)
		Dendrite					Axon							Dendrite Miro1(+/+)	Dendrite Miro1(Δ/Δ)	Axon Miro1(+/+)	Axon Miro1(Δ/Δ)		Unpaired t test				Unpaired t test
WT	Miro1(+/+)	6371.9	4727.43	6443.49	6970.14	5131.59	33218.7	12111.7	20914	13176.5	18490.3		Number of values	5	5	5	5			Table Analyzed	Fig3B axon dendrite length stats			Table Analyzed	Fig3B axon dendrite length stats
ΚΟ	Miro1(Δ/Δ)	3447.91	3749.89	6105.86	5014.61	5421.66	22578.7	15287.3	18616.6	20970.3	18853.2
													Minimum	4727	3448	12112	15287			Column B	Dendrite Miro1(Δ/Δ)			Column D	Axon Miro1(Δ/Δ)
													Maximum	6970	6106	33219	22579			vs.	vs.			vs.	vs.
													Range	2243	2658	21107	7291			Column A	Dendrite Miro1(+/+)			Column C	Axon Miro1(+/+)
													Mean	5929	4748	19582	19261			Unpaired t test				Unpaired t test
													Std. Deviation	951.9	1124	8452	2752			P value	0.1108			P value	0.9376
													Std. Error of Mean	425.7	502.7	3780	1231			P value summary	ns			P value summary	ns
																				Significantly different (P < 0.05)?	No			Significantly different (P < 0.05)?	No
													Shapiro-Wilk test							One- or two-tailed P value?	Two-tailed			One- or two-tailed P value?	Two-tailed
													W	0.9011	0.9316	0.8842	0.9674			t, df	t=1.793, df=8			t, df	t=0.08075, df=8
													P value	0.4161	0.6071	0.329	0.8586
													Passed normality test (alpha=0.05)?	Yes	Yes	Yes	Yes			How big is the difference?				How big is the difference?
													P value summary	ns	ns	ns	ns			Mean of column A	5929			Mean of column C	19582
																				Mean of column B	4748			Mean of column D	19261
													Kolmogorov-Smirnov test							Difference between means (B - A) ± SEM	-1181 ± 658.8			Difference between means (D - C) ± SEM	-321.0 ± 3975
													KS distance	0.2792	0.2127	0.2374	0.2074			95% confidence interval	-2700 to 338.2			95% confidence interval	-9488 to 8846
													P value	>0.1000	>0.1000	>0.1000	>0.1000			R squared (eta squared)	0.2866			R squared (eta squared)	0.0008145
													Passed normality test (alpha=0.05)?	Yes	Yes	Yes	Yes
													P value summary	ns	ns	ns	ns			F test to compare variances				F test to compare variances
																				F, DFn, Dfd	1.395, 4, 4			F, DFn, Dfd	9.431, 4, 4
													Number of values	5	5	5	5			P value	0.755			P value	0.0516
																				P value summary	ns			P value summary	ns
																				Significantly different (P < 0.05)?	No			Significantly different (P < 0.05)?	No
																				Data analyzed				Data analyzed
																				Sample size, column A	5			Sample size, column C	5
																				Sample size, column B	5			Sample size, column D	5

## Sheet: Figure 3C
Figure 3C - Number of Processes
WT	KO
Miro1(+/+)	Miro1(Δ/Δ)			Miro1(+/+)	Miro1(Δ/Δ)		Unpaired t test
474	474		Number of values	5	5			Table Analyzed	Fig3C Processes
339	550
436	597		Minimum	207	395			Column B	Miro1(Δ/Δ)
379	395		Maximum	474	597			vs.	vs.
207	516		Range	267	202			Column A	Miro1(+/+)
			Mean	367	506.4			Unpaired t test
			Std. Deviation	103.4	76.91			P value	0.0419
			Std. Error of Mean	46.23	34.4			P value summary	*
								Significantly different (P < 0.05)?	Yes
			Shapiro-Wilk test					One- or two-tailed P value?	Two-tailed
			W	0.9441	0.9842			t, df	t=2.419, df=8
			P value	0.6951	0.9557
			Passed normality test (alpha=0.05)?	Yes	Yes			How big is the difference?
			P value summary	ns	ns			Mean of column A	367
								Mean of column B	506.4
			Kolmogorov-Smirnov test					Difference between means (B - A) ± SEM	139.4 ± 57.62
			KS distance	0.1932	0.1497			95% confidence interval	6.530 to 272.3
			P value	>0.1000	>0.1000			R squared (eta squared)	0.4225
			Passed normality test (alpha=0.05)?	Yes	Yes
			P value summary	ns	ns			F test to compare variances
								F, DFn, Dfd	1.806, 4, 4
			Number of values	5	5			P value	0.5809
								P value summary	ns
								Significantly different (P < 0.05)?	No
								Data analyzed
								Sample size, column A	5
								Sample size, column B	5

## Sheet: Figure 3D
Figure 3D - Number of Branch Points
WT	KO
Miro1(+/+)	Miro1(Δ/Δ)			Miro1(+/+)	Miro1(Δ/Δ)		Unpaired t test
427	440		Number of values	5	5			Table Analyzed	Fig3D Branch Points
314	503
409	558		Minimum	193	351			Column B	Miro1(Δ/Δ)
365	351		Maximum	427	558			vs.	vs.
193	475		Range	234	207			Column A	Miro1(+/+)
			Mean	341.6	465.4			Unpaired t test
			Std. Deviation	93.84	77.16			P value	0.0522
			Std. Error of Mean	41.97	34.51			P value summary	ns
								Significantly different (P < 0.05)?	No
			Shapiro-Wilk test					One- or two-tailed P value?	Two-tailed
			W	0.904	0.9803			t, df	t=2.279, df=8
			P value	0.4325	0.9361
			Passed normality test (alpha=0.05)?	Yes	Yes			How big is the difference?
			P value summary	ns	ns			Mean of column A	341.6
								Mean of column B	465.4
			Kolmogorov-Smirnov test					Difference between means (B - A) ± SEM	123.8 ± 54.33
			KS distance	0.1985	0.171			95% confidence interval	-1.491 to 249.1
			P value	>0.1000	>0.1000			R squared (eta squared)	0.3936
			Passed normality test (alpha=0.05)?	Yes	Yes
			P value summary	ns	ns			F test to compare variances
								F, DFn, Dfd	1.479, 4, 4
			Number of values	5	5			P value	0.7136
								P value summary	ns
								Significantly different (P < 0.05)?	No
								Data analyzed
								Sample size, column A	5
								Sample size, column B	5

## Sheet: Figure 3E
Figure 3E - Number of Dendritic Branch Points
WT	KO
Miro1(+/+)	Miro1(Δ/Δ)			Miro1(+/+)	Miro1(Δ/Δ)		Unpaired t test
59	51		Number of values	5	5			Table Analyzed	Fig3E Dendritic Branch Points
54	42
43	50		Minimum	29	21			Column B	Miro1(Δ/Δ)
41	28		Maximum	59	51			vs.	vs.
29	21		Range	30	30			Column A	Miro1(+/+)
			Mean	45.2	38.4			Unpaired t test
			Std. Deviation	11.76	13.39			P value	0.4183
			Std. Error of Mean	5.257	5.988			P value summary	ns
								Significantly different (P < 0.05)?	No
			Shapiro-Wilk test					One- or two-tailed P value?	Two-tailed
			W	0.9634	0.8889			t, df	t=0.8533, df=8
			P value	0.8311	0.3516
			Passed normality test (alpha=0.05)?	Yes	Yes			How big is the difference?
			P value summary	ns	ns			Mean of column A	45.2
								Mean of column B	38.4
			Kolmogorov-Smirnov test					Difference between means (B - A) ± SEM	-6.800 ± 7.969
			KS distance	0.1742	0.2068			95% confidence interval	-25.18 to 11.58
			P value	>0.1000	>0.1000			R squared (eta squared)	0.08343
			Passed normality test (alpha=0.05)?	Yes	Yes
			P value summary	ns	ns			F test to compare variances
								F, DFn, Dfd	1.297, 4, 4
			Number of values	5	5			P value	0.8069
								P value summary	ns
								Significantly different (P < 0.05)?	No
								Data analyzed
								Sample size, column A	5
								Sample size, column B	5

## Sheet: Figure 3F
Figure 3F - Number of Axonal Branch Points
WT	KO
Miro1(+/+)	Miro1(Δ/Δ)			Miro1(+/+)	Miro1(Δ/Δ)		Unpaired t test
368	389		Number of values	5	5			Table Analyzed	Fig3F Axonal Branch Points
260	461
366	508		Minimum	164	323			Column B	Miro1(Δ/Δ)
324	323		Maximum	368	508			vs.	vs.
164	454		Range	204	185			Column A	Miro1(+/+)
			Mean	296.4	427			Unpaired t test
			Std. Deviation	86	71.95			P value	0.0314
			Std. Error of Mean	38.46	32.18			P value summary	*
								Significantly different (P < 0.05)?	Yes
			Shapiro-Wilk test					One- or two-tailed P value?	Two-tailed
			W	0.8779	0.9511			t, df	t=2.604, df=8
			P value	0.3001	0.7453
			Passed normality test (alpha=0.05)?	Yes	Yes			How big is the difference?
			P value summary	ns	ns			Mean of column A	296.4
								Mean of column B	427
			Kolmogorov-Smirnov test					Difference between means (B - A) ± SEM	130.6 ± 50.15
			KS distance	0.2259	0.2463			95% confidence interval	14.96 to 246.2
			P value	>0.1000	>0.1000			R squared (eta squared)	0.4588
			Passed normality test (alpha=0.05)?	Yes	Yes
			P value summary	ns	ns			F test to compare variances
								F, DFn, Dfd	1.429, 4, 4
			Number of values	5	5			P value	0.7379
								P value summary	ns
								Significantly different (P < 0.05)?	No
								Data analyzed
								Sample size, column A	5
								Sample size, column B	5

## Sheet: Figure 3G
Figure 3G - Number of intersections between dendritic branches and Sholl rings plotted at distances away from the soma
													Multiple t-tests per row
Distance from Soma (μm)	Miro1(+/+)					Miro1(Δ/Δ)							Discovery?	P value	Mean of Miro1(+/+)	Mean of Miro1(Δ/Δ)	Difference	SE of difference	t ratio	df	q value
0	0	0	0	0	0	0	0	0	0	0					0	0	0	0
5	3	5	4	2	3	4	3	4	2	2			No	0.571623	3.4	3	0.4	0.6782	0.5898	8	0.761038
15	6	9	9	6	6	0	3	5	5	4			No	0.012395	7.2	3.4	3.8	1.183	3.212	8	0.614216
25	7	12	9	8	8	5	8	9	6	5			No	0.100032	8.8	6.6	2.2	1.183	1.859	8	0.614216
35	10	14	12	11	10	9	11	12	7	4			No	0.12191	11.4	8.6	2.8	1.619	1.73	8	0.614216
45	13	15	12	13	11	11	14	15	6	5			No	0.259042	12.8	10.2	2.6	2.14	1.215	8	0.614216
55	14	19	12	20	13	14	13	16	6	8			No	0.130667	15.6	11.4	4.2	2.494	1.684	8	0.614216
65	19	21	15	19	11	18	14	16	7	11			No	0.187155	17	13.2	3.8	2.634	1.442	8	0.614216
75	21	18	20	22	12	22	11	16	8	13			No	0.160832	18.6	14	4.6	2.977	1.545	8	0.614216
85	21	17	16	23	14	26	13	17	12	14			No	0.569279	18.2	16.4	1.8	3.033	0.5934	8	0.761038
95	18	15	16	25	12	25	9	17	12	12			No	0.553257	17.2	15	2.2	3.555	0.6188	8	0.761038
105	14	16	17	25	12	24	8	18	12	10			No	0.531949	16.8	14.4	2.4	3.674	0.6532	8	0.761038
115	16	17	18	24	10	23	11	16	11	11			No	0.446762	17	14.4	2.6	3.25	0.8001	8	0.707332
125	12	16	21	24	12	19	10	15	10	12			No	0.234623	17	13.2	3.8	2.956	1.285	8	0.614216
135	15	16	17	22	12	20	12	15	11	11			No	0.303861	16.4	13.8	2.6	2.366	1.099	8	0.614216
145	17	18	15	23	12	18	16	13	11	12			No	0.216547	17	14	3	2.236	1.342	8	0.614216
155	19	19	16	22	13	16	17	15	9	11			No	0.088713	17.8	13.6	4.2	2.168	1.937	8	0.614216
165	15	17	13	21	13	20	20	13	9	9			No	0.595563	15.8	14.2	1.6	2.895	0.5527	8	0.774429
175	16	16	10	18	14	19	20	14	7	7			No	0.664991	14.8	13.4	1.4	3.114	0.4495	8	0.779103
185	16	16	10	14	14	14	18	10	6	10			No	0.330218	14	11.6	2.4	2.315	1.037	8	0.614216
195	17	15	8	11	13	14	18	11	5	9			No	0.618366	12.8	11.4	1.4	2.702	0.5182	8	0.774429
205	14	14	9	12	13	18	15	9	7	7			No	0.634561	12.4	11.2	1.2	2.429	0.494	8	0.774429
215	13	17	8	11	13	14	11	7	6	3			No	0.122046	12.4	8.2	4.2	2.429	1.729	8	0.614216
225	11	17	7	10	13	12	12	8	6	3			No	0.195708	11.6	8.2	3.4	2.408	1.412	8	0.614216
235	10	16	8	7	12	12	8	7	3	4			No	0.13094	10.6	6.8	3.8	2.258	1.683	8	0.614216
245	9	13	9	7	13	8	7	8	4	3			No	0.02993	10.2	6	4.2	1.594	2.635	8	0.614216
255	10	14	5	6	14	8	7	9	5	3			No	0.159291	9.8	6.4	3.4	2.191	1.552	8	0.614216
265	8	13	4	5	10	8	7	8	4	3			No	0.334921	8	6	2	1.949	1.026	8	0.614216
275	9	13	4	5	7	8	7	6	4	2			No	0.287011	7.6	5.4	2.2	1.929	1.141	8	0.614216
285	11	13	3	4	5	7	6	7	2	1			No	0.30786	7.2	4.6	2.6	2.387	1.089	8	0.614216
295	8	14	3	4	4	5	6	7	2	2			No	0.36379	6.6	4.4	2.2	2.285	0.9629	8	0.614216
305	10	11	3	3	2	3	5	7	4	2			No	0.471362	5.8	4.2	1.6	2.117	0.7559	8	0.726641
315	10	10	2	2	2	2	5	7	3	2			No	0.539851	5.2	3.8	1.4	2.186	0.6403	8	0.761038
325	11	6	1	2	2	1	6	7	2	2			No	0.727686	4.4	3.6	0.8	2.218	0.3607	8	0.789404
335	6	6	1	2	1	1	6	7	3	2			No	0.72349	3.2	3.8	-0.6	1.637	0.3665	8	0.789404
345	5	6	1	2	1	1	5	7	3	2			No	0.700251	3	3.6	-0.6	1.503	0.3991	8	0.78886
355	5	6	1	1	1	1	5	6	3	2			No	0.689723	2.8	3.4	-0.6	1.449	0.414	8	0.78886
365	6	5	0	1	1	1	5	4	3	2			No	0.782355	2.6	3	-0.4	1.4	0.2857	8	0.833279
375	5	7	0	0	0	1	6	4	3	2			No	0.656468	2.4	3.2	-0.8	1.732	0.4619	8	0.779103
385	4	6	0	0	0	1	4	3	5	2			No	0.509673	2	3	-1	1.449	0.6901	8	0.761038
395	5	5	0	0	0	1	1	2	3	2			No	0.879765	2	1.8	0.2	1.281	0.1562	8	0.904152
405	2	4	0	0	0	1	0	2	5	1			No	0.623316	1.2	1.8	-0.6	1.175	0.5108	8	0.774429
415	1	3	0	0	0	1	0	0	3	1			No	0.808887	0.8	1	-0.2	0.8	0.25	8	0.846154
425	1	3	0	0	0	1	0	0	2	1			No	>0.999999	0.8	0.8	0	0.6928	0	8	>0.999999
435	0	2	0	0	0	1	0	0	4	1			No	0.366978	0.4	1.2	-0.8	0.8367	0.9562	8	0.614216
445	0	2	0	0	0	1	0	0	3	1			No	0.402149	0.4	1	-0.6	0.6782	0.8847	8	0.654386
455	0	1	0	0	0	1	0	0	1	1			No	0.241504	0.2	0.6	-0.4	0.3162	1.265	8	0.614216
465	0	0	0	0	0	1	0	0	2	1			No	0.064969	0	0.8	-0.8	0.3742	2.138	8	0.614216
475	0	0	0	0	0	0	0	0	1	1			No	0.141113	0	0.4	-0.4	0.2449	1.633	8	0.614216
485	0	0	0	0	0	0	0	0	3	1			No	0.207305	0	0.8	-0.8	0.5831	1.372	8	0.614216
495	0	0	0	0	0	0	0	0	3	1			No	0.207305	0	0.8	-0.8	0.5831	1.372	8	0.614216
505	0	0	0	0	0	0	0	0	1	0			No	0.346594	0	0.2	-0.2	0.2	1	8	0.614216
515	0	0	0	0	0	0	0	0	1	1			No	0.141113	0	0.4	-0.4	0.2449	1.633	8	0.614216
525	0	0	0	0	0	0	0	0	2	1			No	0.172003	0	0.6	-0.6	0.4	1.5	8	0.614216
535	0	0	0	0	0	0	0	0	0	1			No	0.346594	0	0.2	-0.2	0.2	1	8	0.614216
545	0	0	0	0	0	0	0	0	0	1			No	0.346594	0	0.2	-0.2	0.2	1	8	0.614216
555	0	0	0	0	0	0	0	0	0	1			No	0.346594	0	0.2	-0.2	0.2	1	8	0.614216
565	0	0	0	0	0	0	0	0	0	1			No	0.346594	0	0.2	-0.2	0.2	1	8	0.614216
575	0	0	0	0	0	0	0	0	0	1			No	0.346594	0	0.2	-0.2	0.2	1	8	0.614216
585	0	0	0	0	0	0	0	0	0	0					0	0	0	0
595	0	0	0	0	0	0	0	0	0	0					0	0	0	0

## Sheet: Figure 3H
Figure 3H - Number of intersections between axonal branches and Sholl rings plotted at distances away from the soma
													Multiple t-tests per row
Distance from Soma (μm)	Miro1(+/+)					Miro1(Δ/Δ)							Discovery?	P value	Mean of Miro1(+/+)	Mean of Miro1(Δ/Δ)	Difference	SE of difference	t ratio	df	q value
0	0	0	0	0	0	0	0	0	0	0					0	0	0	0
5	0	0	1	1	0	0	1	0	0	0			No	0.544737	0.4	0.2	0.2	0.3162	0.6325	8	0.77413
15	0	0	6	2	0	7	7	3	2	0			No	0.260431	1.6	3.8	-2.2	1.817	1.211	8	0.61767
25	4	2	20	3	1	5	22	8	6	4			No	0.553223	6	9	-3	4.848	0.6189	8	0.77413
35	6	7	22	8	2	1	42	23	17	8			No	0.27318	9	18.2	-9.2	7.819	1.177	8	0.61767
45	16	14	29	9	6	2	70	29	33	9			No	0.30277	14.8	28.6	-13.8	12.53	1.101	8	0.61767
55	32	16	34	6	9	8	77	39	46	20			No	0.196264	19.4	38	-18.6	13.19	1.41	8	0.61767
65	40	15	40	13	16	13	98	52	48	31			No	0.166324	24.8	48.4	-23.6	15.5	1.523	8	0.61767
75	50	20	34	12	19	16	109	54	61	40			No	0.121598	27	56	-29	16.75	1.732	8	0.61767
85	53	28	43	14	19	19	103	70	64	42			No	0.113518	31.4	59.6	-28.2	15.87	1.777	8	0.61767
95	61	33	38	21	21	34	102	67	67	50			No	0.062321	34.8	64	-29.2	13.49	2.165	8	0.556008
105	52	28	42	22	24	46	106	74	57	54			No	0.02375	33.6	67.4	-33.8	12.14	2.785	8	0.501507
115	65	38	44	31	29	47	105	86	59	59			No	0.043138	41.4	71.2	-29.8	12.41	2.401	8	0.501507
125	53	44	34	46	31	46	97	92	46	65			No	0.045235	41.6	69.2	-27.6	11.64	2.37	8	0.501507
135	48	48	35	46	22	53	73	84	44	69			No	0.022216	39.8	64.6	-24.8	8.769	2.828	8	0.501507
145	55	43	35	50	23	54	65	74	40	75			No	0.046844	41.2	61.6	-20.4	8.689	2.348	8	0.501507
155	52	37	48	48	22	51	57	62	38	77			No	0.100978	41.4	57	-15.6	8.418	1.853	8	0.61767
165	45	41	42	44	20	43	53	56	27	81			No	0.210626	38.4	52	-13.6	9.993	1.361	8	0.61767
175	41	47	54	47	25	59	49	47	30	78			No	0.321749	42.8	52.6	-9.8	9.279	1.056	8	0.61767
185	44	50	39	57	31	63	39	42	25	83			No	0.591882	44.2	50.4	-6.2	11.1	0.5584	8	0.77413
195	45	37	37	56	35	63	28	33	18	79			No	0.860591	42	44.2	-2.2	12.13	0.1814	8	0.93163
205	51	28	33	59	30	50	23	33	20	66			No	0.870194	40.2	38.4	1.8	10.67	0.1687	8	0.93163
215	36	22	34	71	32	43	17	31	14	60			No	0.628533	39	33	6	11.93	0.503	8	0.77413
225	38	21	30	72	30	30	13	25	9	53			No	0.330769	38.2	26	12.2	11.78	1.035	8	0.61767
235	28	18	31	74	36	26	11	19	8	47			No	0.235933	37.4	22.2	15.2	11.86	1.281	8	0.61767
245	22	19	30	80	32	30	8	16	10	40			No	0.248827	36.6	20.8	15.8	12.7	1.244	8	0.61767
255	26	16	26	82	26	23	8	14	8	39			No	0.239421	35.2	18.4	16.8	13.22	1.271	8	0.61767
265	18	15	27	81	32	28	6	20	8	32			No	0.261321	34.6	18.8	15.8	13.07	1.209	8	0.61767
275	19	10	22	66	28	24	4	16	7	31			No	0.28264	29	16.4	12.6	10.94	1.152	8	0.61767
285	12	10	21	71	20	23	5	17	5	30			No	0.405292	26.8	16	10.8	12.29	0.8785	8	0.657433
295	10	8	22	73	20	16	4	23	5	22			No	0.346163	26.6	14	12.6	12.59	1.001	8	0.61767
305	11	10	19	69	18	18	2	24	3	19			No	0.336208	25.4	13.2	12.2	11.92	1.023	8	0.61767
315	15	7	13	66	17	18	1	19	2	13			No	0.287231	23.6	10.6	13	11.4	1.14	8	0.61767
325	20	7	11	65	12	15	1	16	1	13			No	0.254093	23	9.2	13.8	11.23	1.229	8	0.61767
335	19	4	12	57	8	11	0	13	0	14			No	0.253482	20	7.6	12.4	10.08	1.23	8	0.61767
345	11	2	10	56	5	8	1	7	0	12			No	0.303612	16.8	5.6	11.2	10.19	1.099	8	0.61767
355	6	2	9	55	3	8	1	4	1	14			No	0.391225	15	5.6	9.4	10.37	0.9064	8	0.654446
365	5	1	13	51	0	3	1	4	1	12			No	0.343972	14	4.2	9.8	9.744	1.006	8	0.61767
375	4	1	11	48	0	2	0	2	1	12			No	0.340167	12.8	3.4	9.4	9.268	1.014	8	0.61767
385	2	1	9	43	0	2	0	2	1	11			No	0.37989	11	3.2	7.8	8.393	0.9294	8	0.654446
395	2	0	1	36	0	4	0	1	2	15			No	0.665234	7.8	4.4	3.4	7.57	0.4492	8	0.77413
405	2	0	0	35	0	3	0	1	1	15			No	0.660417	7.4	4	3.4	7.454	0.4561	8	0.77413
415	3	0	0	30	0	4	0	1	0	12			No	0.625332	6.6	3.4	3.2	6.302	0.5077	8	0.77413
425	3	0	0	26	0	3	0	1	0	11			No	0.623808	5.8	3	2.8	5.49	0.51	8	0.77413
435	3	0	0	17	0	2	0	0	0	9			No	0.642645	4	2.2	1.8	3.734	0.4821	8	0.77413
445	3	0	0	15	0	2	0	0	0	9			No	0.690568	3.6	2.2	1.4	3.391	0.4128	8	0.786513
455	3	0	0	10	0	0	0	0	0	7			No	0.629361	2.6	1.4	1.2	2.392	0.5017	8	0.77413
465	4	0	0	9	0	1	0	0	0	5			No	0.508871	2.6	1.2	1.4	2.025	0.6914	8	0.77413
475	5	0	0	7	0	2	0	0	0	5			No	0.592583	2.4	1.4	1	1.794	0.5573	8	0.77413
485	3	0	0	4	0	1	0	0	0	3			No	0.582983	1.4	0.8	0.6	1.049	0.5721	8	0.77413
495	2	0	0	2	0	0	0	0	0	4			No	>0.999999	0.8	0.8	0	0.9381	0	8	>0.999999
505	4	0	0	1	0	0	0	0	0	5			No	>0.999999	1	1	0	1.265	0	8	>0.999999
515	4	0	0	1	0	0	0	0	0	5			No	>0.999999	1	1	0	1.265	0	8	>0.999999
525	2	0	0	1	0	0	0	0	0	2			No	0.73281	0.6	0.4	0.2	0.5657	0.3536	8	0.817236
535	0	0	0	0	0	0	0	0	0	0					0	0	0	0
545	0	0	0	0	0	0	0	0	0	0					0	0	0	0
555	0	0	0	0	0	0	0	0	0	0					0	0	0	0
565	0	0	0	0	0	0	0	0	0	0					0	0	0	0
575	0	0	0	0	0	0	0	0	0	0					0	0	0	0
585	0	0	0	0	0	0	0	0	0	0					0	0	0	0
595	0	0	0	0	0	0	0	0	0	0					0	0	0	0

## Sheet: Figure 3J
Figure 3J - MitoSholl
											Multiple t-test per row
Distance from Soma (μm)	Miro1(+/+)					Miro1(Δ/Δ)					Discovery?	P value	Mean of Miro1(+/+)	Mean of Miro1(Δ/Δ)	Difference	SE of difference	t ratio	df	q value
5	0	0	0	0	0	0	0	0	0				0	0	0	0
15	0	0.00299815	0.000306889	0.0023788	0.00039919	0.00449754	0	0.00105957	0.000100831		No	0.869149	0.001217	0.001414	-0.0001979	0.001158	0.1709	7	0.971372
25	0.000359219	0.0129744	0.00140883	0.0185221	0.0013281	0.01764	8.24815e-05	0.006937	0.000459905		No	0.911482	0.006919	0.00628	0.0006387	0.005542	0.1153	7	0.971372
35	0.00248513	0.0293021	0.00268854	0.0450874	0.00354824	0.0379553	0.000601192	0.0198284	0.000905302		No	0.890935	0.01662	0.01482	0.0018	0.01266	0.1422	7	0.971372
45	0.0119332	0.0488645	0.00449521	0.0744421	0.00740641	0.0702778	0.00194978	0.0394192	0.00121722		No	0.956427	0.02943	0.02822	0.001212	0.02141	0.05662	7	0.98486
55	0.0265961	0.072357	0.00760766	0.112169	0.012346	0.113348	0.00556974	0.0681801	0.00199341		No	0.975109	0.04622	0.04727	-0.001058	0.03271	0.03233	7	0.98486
65	0.0541949	0.0951075	0.0136233	0.151646	0.0194635	0.163996	0.0144765	0.103406	0.00309674		No	0.923284	0.06681	0.07124	-0.004437	0.04445	0.09982	7	0.971372
75	0.0909442	0.120032	0.0218002	0.19953	0.0282585	0.223918	0.0308314	0.141277	0.00483988		No	0.892725	0.09211	0.1002	-0.008104	0.05795	0.1398	7	0.971372
85	0.130725	0.146997	0.0329478	0.252687	0.0407172	0.287803	0.054372	0.184815	0.00722065		No	0.864851	0.1208	0.1336	-0.01274	0.07214	0.1766	7	0.971372
95	0.166202	0.174835	0.0465317	0.3123	0.0532741	0.354002	0.0838653	0.230332	0.0150115		No	0.822126	0.1506	0.1708	-0.02017	0.08643	0.2334	7	0.971372
105	0.205643	0.199243	0.0636522	0.375364	0.0680729	0.423101	0.119639	0.279832	0.0329267		No	0.761667	0.1824	0.2139	-0.03148	0.09981	0.3154	7	0.938151
115	0.241886	0.227579	0.0932986	0.440293	0.0847942	0.493185	0.166939	0.330857	0.0764204		No	0.664968	0.2176	0.2669	-0.04928	0.109	0.452	7	0.839522
125	0.278998	0.258457	0.128201	0.502626	0.102669	0.566383	0.218292	0.3761	0.148918		No	0.54327	0.2542	0.3274	-0.07323	0.1146	0.6388	7	0.703465
135	0.314341	0.283429	0.179829	0.569029	0.122612	0.637952	0.273972	0.41781	0.239578		No	0.431818	0.2938	0.3923	-0.09848	0.1181	0.834	7	0.573864
145	0.342914	0.309411	0.244129	0.623762	0.143924	0.697325	0.334776	0.461055	0.330145		No	0.332994	0.3328	0.4558	-0.123	0.1183	1.04	7	0.469622
155	0.369038	0.336308	0.321799	0.680057	0.164894	0.748272	0.394615	0.50041	0.405151		No	0.287629	0.3744	0.5121	-0.1377	0.1197	1.151	7	0.453914
165	0.395283	0.360913	0.397526	0.730479	0.187684	0.794056	0.458891	0.54971	0.481174		No	0.234758	0.4144	0.571	-0.1566	0.1204	1.3	7	0.429455
175	0.419494	0.39523	0.469487	0.776516	0.211329	0.831959	0.522742	0.590583	0.555723		No	0.200248	0.4544	0.6253	-0.1708	0.1208	1.414	7	0.404502
185	0.443594	0.421975	0.535193	0.819505	0.235489	0.862794	0.580565	0.626474	0.622671		No	0.179351	0.4912	0.6731	-0.182	0.122	1.492	7	0.393792
195	0.46674	0.447409	0.603612	0.858714	0.262286	0.888335	0.627594	0.657786	0.684996		No	0.17433	0.5278	0.7147	-0.1869	0.1236	1.512	7	0.393792
205	0.496852	0.481206	0.658833	0.886083	0.290809	0.910487	0.673361	0.6892	0.736429		No	0.166193	0.5628	0.7524	-0.1896	0.1227	1.545	7	0.393792
215	0.522759	0.524555	0.707645	0.907297	0.319483	0.928138	0.7099	0.724263	0.784178		No	0.15853	0.5963	0.7866	-0.1903	0.1206	1.578	7	0.393792
225	0.544539	0.55851	0.748307	0.925923	0.34862	0.94425	0.742529	0.753825	0.836213		No	0.146111	0.6252	0.8192	-0.194	0.1187	1.635	7	0.389297
235	0.567592	0.590147	0.783413	0.941175	0.375509	0.957943	0.779387	0.776345	0.883447		No	0.133757	0.6516	0.8493	-0.1977	0.1166	1.696	7	0.389297
245	0.595326	0.616996	0.817547	0.957066	0.40128	0.967684	0.809194	0.801704	0.914694		No	0.131528	0.6776	0.8733	-0.1957	0.1146	1.707	7	0.389297
255	0.618357	0.643353	0.845249	0.967148	0.43189	0.975076	0.837702	0.820954	0.938496		No	0.127212	0.7012	0.8931	-0.1919	0.1109	1.73	7	0.389297
265	0.646344	0.666878	0.864154	0.974421	0.464694	0.981236	0.864045	0.833769	0.954268		No	0.123529	0.7233	0.9083	-0.185	0.1057	1.75	7	0.389297
275	0.675549	0.704586	0.878966	0.981006	0.501171	0.985964	0.884444	0.843789	0.963593		No	0.12778	0.7483	0.9194	-0.1712	0.09912	1.727	7	0.389297
285	0.707256	0.733816	0.893533	0.986628	0.540594	0.989181	0.900376	0.854499	0.967905		No	0.134406	0.7724	0.928	-0.1556	0.09196	1.692	7	0.389297
295	0.737448	0.766214	0.905708	0.990293	0.581679	0.992515	0.914179	0.868428	0.973864		No	0.137089	0.7963	0.9372	-0.141	0.08398	1.679	7	0.389297
305	0.767336	0.798163	0.915973	0.993228	0.628219	0.995228	0.924397	0.881738	0.981777		No	0.139068	0.8206	0.9458	-0.1252	0.07502	1.669	7	0.389297
315	0.78888	0.824559	0.924969	0.995995	0.674069	0.996919	0.936578	0.900617	0.989333		No	0.128219	0.8417	0.9559	-0.1142	0.06619	1.725	7	0.389297
325	0.810193	0.846956	0.935608	0.99885	0.720675	0.997733	0.946196	0.921922	0.993061		No	0.117528	0.8625	0.9647	-0.1023	0.05731	1.784	7	0.389297
335	0.83196	0.870547	0.947582	0.999717	0.767419	0.998482	0.955584	0.935628	0.996134		No	0.113243	0.8834	0.9715	-0.08801	0.04863	1.81	7	0.389297
345	0.8499	0.891163	0.955352	0.999867	0.815396	0.998923	0.962773	0.943985	0.99846		No	0.108518	0.9023	0.976	-0.0737	0.04008	1.839	7	0.389297
355	0.865077	0.91274	0.963205	0.99989	0.858324	0.99911	0.970838	0.951246	0.999339		No	0.108987	0.9198	0.9801	-0.06029	0.03284	1.836	7	0.389297
365	0.881193	0.93076	0.968149	0.9999	0.892533	0.999186	0.977716	0.959954	0.999523		No	0.105981	0.9345	0.9841	-0.04959	0.02673	1.855	7	0.389297
375	0.897421	0.942047	0.974118	1	0.919139	0.999483	0.985222	0.966542	0.999706		No	0.1035	0.9465	0.9877	-0.04119	0.02201	1.871	7	0.389297
385	0.915497	0.950045	0.980056	1	0.939078	0.999524	0.990862	0.971781	0.99974		No	0.103262	0.9569	0.9905	-0.03354	0.01791	1.873	7	0.389297
395	0.92932	0.959815	0.984843	1	0.959733	0.999662	0.993495	0.977826	0.999827		No	0.115667	0.9667	0.9927	-0.02596	0.01446	1.795	7	0.389297
405	0.938801	0.969694	0.989245	1	0.973939	0.999789	0.994911	0.983047	0.999963		No	0.146468	0.9743	0.9944	-0.02009	0.0123	1.633	7	0.389297
415	0.946742	0.980596	0.993958	1	0.983778	0.999992	0.996668	0.988701	0.999976		No	0.196922	0.981	0.9963	-0.01532	0.01074	1.426	7	0.404502
425	0.954678	0.98654	0.997072	1	0.991665	1	0.999041	0.99411	0.999993		No	0.229348	0.986	0.9983	-0.01229	0.009336	1.317	7	0.429455
435	0.960513	0.991614	0.998381	1	0.995734	1	0.999782	0.999207	1		No	0.246618	0.9892	0.9997	-0.0105	0.008305	1.264	7	0.429455
445	0.965979	0.995696	0.998737	1	0.998213	1	0.999978	1	1		No	0.297123	0.9917	1	-0.008269	0.007341	1.126	7	0.454688
455	0.972813	0.997434	0.999241	1	0.999204	1	1	1	1		No	0.327668	0.9937	1	-0.006262	0.005951	1.052	7	0.469622
465	0.983283	0.998478	0.999857	1	0.999672	1	1	1	1		No	0.344379	0.9963	1	-0.003742	0.003691	1.014	7	0.470031
475	0.992967	0.999075	0.999999	1	0.999927	1	1	1	1		No	0.33478	0.9984	1	-0.001607	0.001551	1.036	7	0.469622
485	0.998625	0.999552	1	1	0.999993	1	1	1	1		No	0.265131	0.9996	1	-0.000366	0.0003022	1.211	7	0.446174
495	0.999734	0.999919	1	1	1	1	1	1	1		No	0.273889	0.9999	1	-6.94e-05	5.846e-05	1.187	7	0.446174
505	0.999995	0.999998	1	1	1	1	1	1	1		No	0.238508	1	1	-1.5e-06	1.164e-06	1.289	7	0.429455
515	1	1	1	1	1	1	1	1	1				1	1	0	0
525	1	1	1	1	1	1	1	1	1				1	1	0	0
535	1	1	1	1	1	1	1	1	1				1	1	0	0
545	1	1	1	1	1	1	1	1	1				1	1	0	0
555	1	1	1	1	1	1	1	1	1				1	1	0	0
565	1	1	1	1	1	1	1	1	1				1	1	0	0
575	1	1	1	1	1	1	1	1	1				1	1	0	0
585	1	1	1	1	1	1	1	1	1				1	1	0	0
595	1	1	1	1	1	1	1	1	1				1	1	0	0

## Sheet: Figure 3K
Figure 3K - Normalised Eucledian distance between mitcohondria and sites of branching
WT	KO
Miro1(+/+)	Miro1(Δ/Δ)			Miro1(+/+)	Miro1(Δ/Δ)		Mann Whitney test
2.16498	0.0788276		Number of values	122	171			Table Analyzed	Fig3K norm bp-mito distance
1.23529	0.000402201
1.41132	0.829944		Minimum	0.0001973	5.886e-05			Column B	Miro1(Δ/Δ)
2.51864	0.711133		Maximum	2.659	3.407			vs.	vs.
0.834289	0.141812		Range	2.659	3.407			Column A	Miro1(+/+)
1.00984	0.884374
0.636397	0.401974		Mean	1	0.7338			Mann Whitney test
0.141793	0.402333		Std. Deviation	0.6278	0.5109			P value	0.0003
0.899802	0.402042		Std. Error of Mean	0.05684	0.03907			Exact or approximate P value?	Approximate
0.14274	0.000350198							P value summary	***
0.513127	0.31857			Miro1(+/+)	Miro1(Δ/Δ)			Significantly different (P < 0.05)?	Yes
2.04022	0.142472		Test for normal distribution					One- or two-tailed P value?	Two-tailed
0.834136	0.586628		Anderson-Darling test					Sum of ranks in column A,B	20526 , 22545
0.142325	0.51344		A2*	1.151	1.43			Mann-Whitney U	7839
0.846441	0.730862		P value	0.005	0.001
0.744633	0.569617		Passed normality test (alpha=0.05)?	No	No			Difference between medians
1.46882	0.834354		P value summary	**	**			Median of column A	0.8499, n=122
0.513315	0.603903							Median of column B	0.7169, n=171
0.716897	1.1151		D'Agostino & Pearson test					Difference: Actual	-0.133
0.711731	0.402558		K2	4.572	50.43			Difference: Hodges-Lehmann	-0.2537
1.44795	0.40234		P value	0.1017	<0.0001
1.74484	0.1422		Passed normality test (alpha=0.05)?	Yes	No
1.4609	0.317958		P value summary	ns	****
0.000518125	0.142317
0.636553	0.318298		Shapiro-Wilk test
1.81438	0.834424		W	0.966	0.9275
0.000700965	0.426913		P value	0.0036	<0.0001
0.710917	0.284563		Passed normality test (alpha=0.05)?	No	No
0.84645	0.141885		P value summary	**	****
0.784312	0.450187
1.00585	0.000450439		Kolmogorov-Smirnov test
1.87305	0.846273		KS distance	0.1041	0.08004
0.427061	0.449977		P value	0.0024	0.0095
1.28793	1.2991		Passed normality test (alpha=0.05)?	No	No
0.000248025	0.402881		P value summary	**	**
0.784527	0.568571
1.74552	0.284526		Number of values	122	171
1.20729	0.586913
2.65912	0.477101
0.7445	1.15955
1.32261	0.424013
0.000197307	1.05106
2.04968	0.84666
0.730867	0.000199375
1.15914	1.50266
0.284061	0.854078
0.771366	1.25998
0.426665	0.317951
0.635927	0.201172
2.15951	0.200941
0.71152	1.12393
1.00971	0.402229
1.69303	0.000231414
0.92624	1.55577
1.66881	1.14694
1.47447	0.784461
1.87363	0.881255
1.52259	1.43379
2.22981	0.805213
0.000355124	0.142573
0.716897	0.716897
0.402841	2.17364
0.56962	0.881511
0.317905	1.42949
0.744681	1.50269
0.000273159	1.15052
0.92632	0.586176
0.449336	0.846419
1.01029	0.741597
1.41789	0.255337
1.23503	5.88554e-05
0.449883	1.00556
1.14741	0.636496
0.603663	0.720396
0.711585	0.730916
1.19402	0.74462
1.49482	0.292987
0.771343	0.211999
0.000607258	3.40694
1.60701	1.57888
0.426682	0.429627
2.15537	1.0256
1.79669	0.362189
0.000394395	1.15945
1.72152	0.829947
1.54253	0.450084
2.1356	1.08415
1.64455	0.143031
0.915396	0.000285264
1.46858	0.784331
1.67473	0.636256
0.000654165	0.58602
1.17285	1.35287
0.853193	0.784488
0.586337	0.142693
1.00981	0.201583
0.829653	0.829761
0.804557	0.881666
1.14723	1.32204
1.20769	2.33562
0.318275	0.712042
2.23396	0.426921
1.74475	1.11115
0.84662	0.426885
0.711167	0.784159
1.23552	1.15906
0.771438	0.284981
0.141779	1.2516
0.716897	1.11121
0.000331715	1.07762
0.771263	1.87364
0.716897	1.56875
2.26998	0.28464
0.926157	0.911019
0.569547	0.829287
1.02501	0.000624648
0.426753	0.711191
1.06996	0.201067
0.918381	0.711405
0.72036	1.62197
1.34669	0.000453861
0.293259	1.76875
	0.1427
	0.716897
	0.636607
	0.000407646
	1.00547
	0.952781
	0.142774
	0.0477668
	0.864804
	0.43704
	0.0670091
	0.911179
	0.586622
	0.716897
	1.23546
	1.00629
	0.716897
	0.141946
	0.784226
	0.636353
	0.603914
	0.915376
	1.5218
	0.784177
	1.04898
	0.766494
	0.149613
	1.17808
	0.0479601
	1.21514
	0.512857
	0.603894
	0.655972
	0.607902
	0.777571
	1.06642
	1.2828
	1.48405
	0.937349
	0.603815
	0.61181
	1.45659
	1.2076
	0.828096
	0.916342
	1.53905
	1.2158
	0.426959
	0.846311
