# Supplementary material for: Miro1-dependent mitochondrial dynamics in parvalbumin interneurons
Source: eLife. 2021 Jun 30;10:e65215. doi: 10.7554/eLife.65215 (PMC8294849; doi:10.7554/eLife.65215)
Supplement: Figure 4—figure supplement 1—source data 1. [file elife-65215-fig4-figsupp1-data1.xlsx]

## Sheet: Fig4 FigSup1B
Figure 4 Figure Supplement 1B - Peak Amplitude (mV)
WT	HET	KO			Miro1(+/+)	Miro1(+/Δ)	Miro1(Δ/Δ)		Table Analyzed	Fig4FigSup1B peak amplitude						Number of families	1
Miro1(+/+)	Miro1(+/Δ)	Miro1(Δ/Δ)		Number of values	7	14	19		Data sets analyzed	A-C						Number of comparisons per family	3
68.2237	48.3064	37.0668														Alpha	0.05
64.1659	59.1402	52.9619		Minimum	55.44	48.31	37.07		ANOVA summary
62.4733	55.6504	43.8741		Maximum	68.22	74.56	79.61		F	0.2264						Tukey's multiple comparisons test	Mean Diff.	95.00% CI of diff.	Significant?	Summary	Adjusted P Value
64.6651	61.0855	70.6873		Range	12.79	26.25	42.55		P value	0.7985						Miro1(+/+) vs. Miro1(+/Δ)	-1.171	-11.95 to 9.606	No	ns	0.962	A-B
55.4356	74.5551	66.9471							P value summary	ns						Miro1(+/+) vs. Miro1(Δ/Δ)	1.086	-9.206 to 11.38	No	ns	0.9641	A-C
59.3399	54.638	71.7679		Mean	62.9	64.07	61.82		Significant diff. among means (P < 0.05)?	No						Miro1(+/Δ) vs. Miro1(Δ/Δ)	2.257	-5.942 to 10.46	No	ns	0.781	B-C
66.0258	65.0028	60.9611		Std. Deviation	4.309	8.991	11.06		R squared	0.01209
	72.2533	79.6142		Std. Error of Mean	1.629	2.403	2.537									Test details	Mean 1	Mean 2	Mean Diff.	SE of diff.	n1	n2	q	DF
	64.5514	68.2335							Brown-Forsythe test							Miro1(+/+) vs. Miro1(+/Δ)	62.9	64.07	-1.171	4.414	7	14	0.3751	37
	74.5129	53.5735							F (DFn, DFd)	3.001 (2, 37)						Miro1(+/+) vs. Miro1(Δ/Δ)	62.9	61.82	1.086	4.216	7	19	0.3645	37
	52.8267	54.6742							P value	0.062						Miro1(+/Δ) vs. Miro1(Δ/Δ)	64.07	61.82	2.257	3.358	14	19	0.9505	37
	74.4272	55.1003							P value summary	ns
	67.1158	71.9479							Are SDs significantly different (P < 0.05)?	No
	72.982	60.5419
		72.562							Bartlett's test
		52.3655							Bartlett's statistic (corrected)	5.47
		73.7501							P value	0.0649
		63.1976							P value summary	ns
		64.7093							Are SDs significantly different (P < 0.05)?	No
									ANOVA table	SS	DF	MS	F (DFn, DFd)	P value
									Treatment (between columns)	41.16	2	20.58	F (2, 37) = 0.2264	P=0.7985
									Residual (within columns)	3364	37	90.91
									Total	3405	39
									Data summary
									Number of treatments (columns)	3
									Number of values (total)	40

## Sheet: Fig4 FigSup1C
Figure 4 Figure Supplement 1C - Half width (ms)
WT	HET	KO			Miro1(+/+)	Miro1(+/Δ)	Miro1(Δ/Δ)		Table Analyzed	Fig4FigSup1C halfwidth						Number of families	1
Miro1(+/+)	Miro1(+/Δ)	Miro1(Δ/Δ)		Number of values	6	14	19		Data sets analyzed	A-C						Number of comparisons per family	3
0.312401	0.305294	0.395893														Alpha	0.05
0.424823	0.368702	0.264789		Minimum	0.3124	0.212	0.2196		ANOVA summary
0.412232	0.275493	0.277158		Maximum	0.4978	0.4816	0.4503		F	3.179						Tukey's multiple comparisons test	Mean Diff.	95.00% CI of diff.	Significant?	Summary	Adjusted P Value
0.347556	0.211958	0.295623		Range	0.1854	0.2696	0.2307		P value	0.0535						Miro1(+/+) vs. Miro1(+/Δ)	0.07911	0.0004815 to 0.1577	Yes	*	0.0483	A-B
	0.261345	0.304197							P value summary	ns						Miro1(+/+) vs. Miro1(Δ/Δ)	0.06713	-0.008322 to 0.1426	No	ns	0.0893	A-C
0.497796	0.247975	0.284476		Mean	0.3899	0.3108	0.3227		Significant diff. among means (P < 0.05)?	No						Miro1(+/Δ) vs. Miro1(Δ/Δ)	-0.01197	-0.06872 to 0.04478	No	ns	0.8643	B-C
0.344385	0.380043	0.383851		Std. Deviation	0.06816	0.06841	0.06341		R squared	0.1501
	0.284281	0.219578		Std. Error of Mean	0.02783	0.01828	0.01455									Test details	Mean 1	Mean 2	Mean Diff.	SE of diff.	n1	n2	q	DF
	0.366329	0.227181							Brown-Forsythe test							Miro1(+/+) vs. Miro1(+/Δ)	0.3899	0.3108	0.07911	0.03217	6	14	3.478	36
	0.306106	0.450281							F (DFn, DFd)	0.05761 (2, 36)						Miro1(+/+) vs. Miro1(Δ/Δ)	0.3899	0.3227	0.06713	0.03087	6	19	3.076	36
	0.481587	0.385114							P value	0.9441						Miro1(+/Δ) vs. Miro1(Δ/Δ)	0.3108	0.3227	-0.01197	0.02322	14	19	0.7291	36
	0.306658	0.330737							P value summary	ns
	0.27401	0.265343							Are SDs significantly different (P < 0.05)?	No
	0.280862	0.35454
		0.279991							Bartlett's test
		0.410738							Bartlett's statistic (corrected)	0.09585
		0.319398							P value	0.9532
		0.360581							P value summary	ns
		0.322414							Are SDs significantly different (P < 0.05)?	No
									ANOVA table	SS	DF	MS	F (DFn, DFd)	P value
									Treatment (between columns)	0.02763	2	0.01381	F (2, 36) = 3.179	P=0.0535
									Residual (within columns)	0.1564	36	0.004346
									Total	0.1841	38
									Data summary
									Number of treatments (columns)	3
									Number of values (total)	39

## Sheet: Fig4 FigSup1D
Figure 4 Figure Supplement 1D - Spike Rate at 40 pA above rheobase current (Hz)
WT	HET	KO
Miro1(+/+)	Miro1(+/Δ)	Miro1(Δ/Δ)			Miro1(+/+)	Miro1(+/Δ)	Miro1(Δ/Δ)		Table Analyzed	Fig4FigSup1D spike rate						Number of families	1
7	25	35.3333		Number of values	7	12	16		Data sets analyzed	A-C						Number of comparisons per family	3
22.6154	18.2															Alpha	0.05
20.0833		36.5		Minimum	7	5	5		ANOVA summary
7.33333	5	25		Maximum	49	36.77	59		F	1.404						Tukey's multiple comparisons test	Mean Diff.	95.00% CI of diff.	Significant?	Summary	Adjusted P Value
49	9	36.4444		Range	42	31.77	54		P value	0.2603						Miro1(+/+) vs. Miro1(+/Δ)	3.201	-12.72 to 19.12	No	ns	0.8747	A-B
23	16.5	11							P value summary	ns						Miro1(+/+) vs. Miro1(Δ/Δ)	-5.38	-20.55 to 9.790	No	ns	0.6618	A-C
12.0833	36.7692	36		Mean	20.16	16.96	25.54		Significant diff. among means (P < 0.05)?	No						Miro1(+/Δ) vs. Miro1(Δ/Δ)	-8.581	-21.37 to 4.203	No	ns	0.2402	B-C
	12.5714	8.33333		Std. Deviation	14.43	10.15	15.4		R squared	0.08068
				Std. Error of Mean	5.453	2.929	3.85									Test details	Mean 1	Mean 2	Mean Diff.	SE of diff.	n1	n2	q	DF
	30.4	24.3333							Brown-Forsythe test							Miro1(+/+) vs. Miro1(+/Δ)	20.16	16.96	3.201	6.479	7	12	0.6987	32
	5.52726	36.125							F (DFn, DFd)	1.346 (2, 32)						Miro1(+/+) vs. Miro1(Δ/Δ)	20.16	25.54	-5.38	6.173	7	16	1.233	32
	23.8667	11							P value	0.2746						Miro1(+/Δ) vs. Miro1(Δ/Δ)	16.96	25.54	-8.581	5.202	12	16	2.333	32
	11	16.4							P value summary	ns
	9.66667	43							Are SDs significantly different (P < 0.05)?	No
		9.83333
		59							Bartlett's test
		15.3333							Bartlett's statistic (corrected)	2.018
									P value	0.3646
		5							P value summary	ns
									Are SDs significantly different (P < 0.05)?	No
									ANOVA table	SS	DF	MS	F (DFn, DFd)	P value
									Treatment (between columns)	521.2	2	260.6	F (2, 32) = 1.404	P=0.2603
									Residual (within columns)	5939	32	185.6
									Total	6460	34
									Data summary
									Number of treatments (columns)	3
									Number of values (total)	35

## Sheet: Fig4 FigSup1E
Figure 4 Figure Supplement 1E - Input Resistance (MΩ)
WT	HET	KO
Miro1(+/+)	Miro1(+/Δ)	Miro1(Δ/Δ)			Miro1(+/+)	Miro1(+/Δ)	Miro1(Δ/Δ)		Table Analyzed	Fig4FigSup1E input resistance						Number of families	1
-98.7375	-142.772	-93.0041		Number of values	7	14	19		Data sets analyzed	A-C						Number of comparisons per family	3
-121.358	-159.357	-58.2683														Alpha	0.05
-140.02	-81.3187	-124.914		Minimum	-208	-186.7	-280.9		ANOVA summary
-69.7115	-71.3956	-128.379		Maximum	-69.71	-54.86	-43.37		F	0.2002						Tukey's multiple comparisons test	Mean Diff.	95.00% CI of diff.	Significant?	Summary	Adjusted P Value
-156.476	-71.4087	-147.731		Range	138.3	131.8	237.5		P value	0.8195						Miro1(+/+) vs. Miro1(+/Δ)	-14.74	-72.61 to 43.14	No	ns	0.8092	A-B
-208.027	-71.274	-73.3517							P value summary	ns						Miro1(+/+) vs. Miro1(Δ/Δ)	-11.74	-67.02 to 43.54	No	ns	0.8628	A-C
-76.1751	-164.294	-138.615		Mean	-124.4	-109.6	-112.6		Significant diff. among means (P < 0.05)?	No						Miro1(+/Δ) vs. Miro1(Δ/Δ)	2.996	-41.04 to 47.03	No	ns	0.9849	B-C
	-69.0183	-79.9082		Std. Deviation	48.74	46.46	55.14		R squared	0.01071
	-84.5653	-43.369		Std. Error of Mean	18.42	12.42	12.65									Test details	Mean 1	Mean 2	Mean Diff.	SE of diff.	n1	n2	q	DF
	-186.658	-150.361							Brown-Forsythe test							Miro1(+/+) vs. Miro1(+/Δ)	-124.4	-109.6	-14.74	23.71	7	14	0.8791	37
	-179.463	-167.138							F (DFn, DFd)	0.04053 (2, 37)						Miro1(+/+) vs. Miro1(Δ/Δ)	-124.4	-112.6	-11.74	22.64	7	19	0.7333	37
	-98.2524	-56.1289							P value	0.9603						Miro1(+/Δ) vs. Miro1(Δ/Δ)	-109.6	-112.6	2.996	18.04	14	19	0.2349	37
	-100.064	-74.4718							P value summary	ns
	-54.8598	-280.91							Are SDs significantly different (P < 0.05)?	No
		-55.6842
		-123.35							Bartlett's test
		-108.322							Bartlett's statistic (corrected)	0.4458
		-97.0477							P value	0.8002
		-138.771							P value summary	ns
									Are SDs significantly different (P < 0.05)?	No
									ANOVA table	SS	DF	MS	F (DFn, DFd)	P value
									Treatment (between columns)	1050	2	525	F (2, 37) = 0.2002	P=0.8195
									Residual (within columns)	97035	37	2623
									Total	98085	39
									Data summary
									Number of treatments (columns)	3
									Number of values (total)	40

## Sheet: Fig4 FigSup1F
Figure 4 Figure Supplement 1F - Threshold to fire (mV)
WT	HET	KO
Miro1(+/+)	Miro1(+/Δ)	Miro1(Δ/Δ)			Miro1(+/+)	Miro1(+/Δ)	Miro1(Δ/Δ)		Table Analyzed	Fig4FigSup1F threshold						Number of families	1
-36.039	-39.1931	-33.6784		Number of values	7	14	19		Data sets analyzed	A-C						Number of comparisons per family	3
-32.4983	-33.1638	-37.9632														Alpha	0.05
-31.5336	-44.1318	-36.7702		Minimum	-36.39	-44.13	-41.2		ANOVA summary
-33.864	-32.6724	-33.6338		Maximum	-31.53	-28.66	-28.53		F	1.624						Tukey's multiple comparisons test	Mean Diff.	95.00% CI of diff.	Significant?	Summary	Adjusted P Value
-36.3922	-34.8601	-40.067		Range	4.859	15.47	12.67		P value	0.2109						Miro1(+/+) vs. Miro1(+/Δ)	2.175	-1.405 to 5.754	No	ns	0.3104	A-B
-32.2076	-38.4279	-41.2043							P value summary	ns						Miro1(+/+) vs. Miro1(Δ/Δ)	2.476	-0.9428 to 5.895	No	ns	0.1943	A-C
-33.6924	-35.3231	-33.2873		Mean	-33.75	-35.92	-36.22		Significant diff. among means (P < 0.05)?	No						Miro1(+/Δ) vs. Miro1(Δ/Δ)	0.3013	-2.422 to 3.025	No	ns	0.9606	B-C
	-37.5494	-38.8503		Std. Deviation	1.875	3.671	3.117		R squared	0.08069
	-33.2549	-36.7296		Std. Error of Mean	0.7087	0.981	0.715									Test details	Mean 1	Mean 2	Mean Diff.	SE of diff.	n1	n2	q	DF
	-36.1338	-34.029							Brown-Forsythe test							Miro1(+/+) vs. Miro1(+/Δ)	-33.75	-35.92	2.175	1.466	7	14	2.098	37
	-28.663	-34.7021							F (DFn, DFd)	1.050 (2, 37)						Miro1(+/+) vs. Miro1(Δ/Δ)	-33.75	-36.22	2.476	1.4	7	19	2.501	37
	-37.5311	-34.8098							P value	0.36						Miro1(+/Δ) vs. Miro1(Δ/Δ)	-35.92	-36.22	0.3013	1.115	14	19	0.382	37
	-34.2604	-39.9933							P value summary	ns
	-37.7333	-35.5408							Are SDs significantly different (P < 0.05)?	No
		-38.1193
		-28.5304							Bartlett's test
		-39.9824							Bartlett's statistic (corrected)	2.897
		-35.0401							P value	0.2349
		-35.2987							P value summary	ns
									Are SDs significantly different (P < 0.05)?	No
									ANOVA table	SS	DF	MS	F (DFn, DFd)	P value
									Treatment (between columns)	32.57	2	16.29	F (2, 37) = 1.624	P=0.2109
									Residual (within columns)	371.1	37	10.03
									Total	403.7	39
									Data summary
									Number of treatments (columns)	3
									Number of values (total)	40

## Sheet: Fig4 FigSup1G
Figure 4 Figure Supplement 1G - Time constant (ms)
WT	HET	KO
Miro1(+/+)	Miro1(+/Δ)	Miro1(Δ/Δ)			Miro1(+/+)	Miro1(+/Δ)	Miro1(Δ/Δ)		Table Analyzed	Fig4FigSup1G time constant						Number of families	1
21.9506	6.70969	8.10072		Number of values	7	13	19		Data sets analyzed	A-C						Number of comparisons per family	3
11.8753	14.6108	7.1714														Alpha	0.05
10.3194	5.40617	5.07123		Minimum	5.152	4.617	5.071		ANOVA summary
8.35147	7.36968	10.1753		Maximum	21.95	14.61	14.64		F	3.391						Tukey's multiple comparisons test	Mean Diff.	95.00% CI of diff.	Significant?	Summary	Adjusted P Value
12.2874	5.32616	8.09094		Range	16.8	9.994	9.568		P value	0.0448						Miro1(+/+) vs. Miro1(+/Δ)	3.389	-0.2532 to 7.032	No	ns	0.0725	A-B
12.3426	10.1078	7.68831							P value summary	*						Miro1(+/+) vs. Miro1(Δ/Δ)	3.495	0.05934 to 6.930	Yes	*	0.0455	A-C
5.15247	8.94837	10.7909		Mean	11.75	8.365	8.26		Significant diff. among means (P < 0.05)?	Yes						Miro1(+/Δ) vs. Miro1(Δ/Δ)	0.1053	-2.691 to 2.902	No	ns	0.9953	B-C
	7.53645	6.67285		Std. Deviation	5.193	2.73	2.499		R squared	0.1585
		6.21628		Std. Error of Mean	1.963	0.7573	0.5734									Test details	Mean 1	Mean 2	Mean Diff.	SE of diff.	n1	n2	q	DF
	8.001	7.64473							Brown-Forsythe test							Miro1(+/+) vs. Miro1(+/Δ)	11.75	8.365	3.389	1.49	7	13	3.217	36
	10.1507	9.24949							F (DFn, DFd)	1.116 (2, 36)						Miro1(+/+) vs. Miro1(Δ/Δ)	11.75	8.26	3.495	1.405	7	19	3.516	36
	8.95944	5.80345							P value	0.3386						Miro1(+/Δ) vs. Miro1(Δ/Δ)	8.365	8.26	0.1053	1.144	13	19	0.1302	36
	11.0009	6.19724							P value summary	ns
	4.61707	14.6392							Are SDs significantly different (P < 0.05)?	No
		6.57918
		7.70088							Bartlett's test
		6.47671							Bartlett's statistic (corrected)	6.129
		13.1202							P value	0.0467
		9.5441							P value summary	*
									Are SDs significantly different (P < 0.05)?	Yes
									ANOVA table	SS	DF	MS	F (DFn, DFd)	P value
									Treatment (between columns)	68.52	2	34.26	F (2, 36) = 3.391	P=0.0448
									Residual (within columns)	363.7	36	10.1
									Total	432.2	38
									Data summary
									Number of treatments (columns)	3
									Number of values (total)	39
