# Supplementary material for: Miro1-dependent mitochondrial dynamics in parvalbumin interneurons
Source: eLife. 2021 Jun 30;10:e65215. doi: 10.7554/eLife.65215 (PMC8294849; doi:10.7554/eLife.65215)
Supplement: Figure 4—source data 1. [file elife-65215-fig4-data1.xlsx]

## Sheet: Figure 4B
Figure 4B - sIPSC inter-event interval (s)
WT	KO			Miro1(+/+)	Miro1(Δ/Δ)		Mann Whitney test
Miro1(+/+)	Miro1(Δ/Δ)		Number of values	13	12			Table Analyzed	Fig4B sIPSC IEI
0.0256189	0.0301785
0.0184808	0.0169585		Minimum	0.01711	0.01696			Column B	Miro1(Δ/Δ)
0.0301526	0.021754		Maximum	0.07732	0.03665			vs.	vs.
0.0372983	0.0365696		Range	0.0602	0.0197			Column A	Miro1(+/+)
0.0335876	0.032111
0.0180602	0.0306236		Mean	0.0309	0.02683			Mann Whitney test
0.0773158	0.0198706		Std. Deviation	0.01543	0.00708			P value	0.6885
0.0270295	0.0320306		Std. Error of Mean	0.00428	0.002044			Exact or approximate P value?	Exact
0.0260829	0.0174888							P value summary	ns
0.0292062	0.0250562			Miro1(+/+)	Miro1(Δ/Δ)			Significantly different (P < 0.05)?	No
0.0171144	0.036654		Test for normal distribution					One- or two-tailed P value?	Two-tailed
0.024704	0.0226477		Anderson-Darling test					Sum of ranks in column A,B	177 , 148
0.0370897			A2*	1.252	0.3719			Mann-Whitney U	70
			P value	0.0018	0.3606
			Passed normality test (alpha=0.05)?	No	Yes			Difference between medians
			P value summary	**	ns			Median of column A	0.02703, n=13
								Median of column B	0.02762, n=12
			D'Agostino & Pearson test					Difference: Actual	0.0005878
			K2	22.57	2.601			Difference: Hodges-Lehmann	-0.001009
			P value	<0.0001	0.2724
			Passed normality test (alpha=0.05)?	No	Yes
			P value summary	****	ns
			Shapiro-Wilk test
			W	0.7188	0.92
			P value	0.0009	0.2858
			Passed normality test (alpha=0.05)?	No	Yes
			P value summary	***	ns
			Kolmogorov-Smirnov test
			KS distance	0.2624	0.1819
			P value	0.0147	>0.1000
			Passed normality test (alpha=0.05)?	No	Yes
			P value summary	*	ns
			Number of values	13	12

## Sheet: Figure 4C
Figure 4C - Median amplitude (pA)
WT	KO
Miro1(+/+)	Miro1(Δ/Δ)			Miro1(+/+)	Miro1(Δ/Δ)		Mann Whitney test
-141.27	-122.853		Number of values	13	12			Table Analyzed	Fig4C sIPSC amplitude
-128.845	-163.892
-145.583	-168.43		Minimum	-340.7	-245			Column B	Miro1(Δ/Δ)
-144.832	-146.356		Maximum	-114.9	-108.1			vs.	vs.
-133.124	-137.784		Range	225.8	136.9			Column A	Miro1(+/+)
-340.729	-166.938
-114.899	-245.01		Mean	-159	-169.7			Mann Whitney test
-180.432	-108.091		Std. Deviation	57.9	40.8			P value	0.2051
-144.066	-172.269		Std. Error of Mean	16.06	11.78			Exact or approximate P value?	Exact
-130.214	-221.714							P value summary	ns
-185.065	-165.286			Miro1(+/+)	Miro1(Δ/Δ)			Significantly different (P < 0.05)?	No
-136.39	-217.788		Test for normal distribution					One- or two-tailed P value?	Two-tailed
-142.175			Anderson-Darling test					Sum of ranks in column A,B	193 , 132
			A2*	2.083	0.4036			Mann-Whitney U	54
			P value	<0.0001	0.2995
			Passed normality test (alpha=0.05)?	No	Yes			Difference between medians
			P value summary	****	ns			Median of column A	-142.2, n=13
								Median of column B	-166.1, n=12
			D'Agostino & Pearson test					Difference: Actual	-23.94
			K2	28.11	0.6098			Difference: Hodges-Lehmann	-22.73
			P value	<0.0001	0.7372
			Passed normality test (alpha=0.05)?	No	Yes
			P value summary	****	ns
			Shapiro-Wilk test
			W	0.5973	0.9397
			P value	<0.0001	0.4948
			Passed normality test (alpha=0.05)?	No	Yes
			P value summary	****	ns
			Kolmogorov-Smirnov test
			KS distance	0.3612	0.2249
			P value	<0.0001	0.0951
			Passed normality test (alpha=0.05)?	No	Yes
			P value summary	****	ns
			Number of values	13	12

## Sheet: Figure 4G
Figure 4G - eIPSC Amplitude (nA)
WT	KO
Miro1(+/+)	Miro1(Δ/Δ)			Miro1(+/+)	Miro1(Δ/Δ)		Unpaired t test
4.46	2.84		Number of values	23	23			Table Analyzed	Fig4G eIPSC amplitude nA
4.55	2.99
3.33	1.7		Minimum	0.624	0.643			Column B	Miro1(Δ/Δ)
0.747	5.97		Maximum	8.97	6.66			vs.	vs.
0.624	2.4		Range	8.346	6.017			Column A	Miro1(+/+)
1.73	3.5
2.69	1.01		Mean	3.284	3.189			Unpaired t test
1.94	4.18		Std. Deviation	1.886	1.764			P value	0.8612
3.28	5.81		Std. Error of Mean	0.3932	0.3678			P value summary	ns
3.52	4.91							Significantly different (P < 0.05)?	No
4.99	2.68			Miro1(+/+)	Miro1(Δ/Δ)			One- or two-tailed P value?	Two-tailed
2.56	5.81		Test for normal distribution					t, df	t=0.1759, df=44
4.21	0.935		Anderson-Darling test
6.01	1.97		A2*	0.4688	0.3412			How big is the difference?
1.56	1.88		P value	0.2258	0.4637			Mean of column A	3.284
4.82	0.865		Passed normality test (alpha=0.05)?	Yes	Yes			Mean of column B	3.189
2.65	0.643		P value summary	ns	ns			Difference between means (B - A) ± SEM	-0.09470 ± 0.5384
2.69	4.03							95% confidence interval	-1.180 to 0.9904
2.49	3.94		D'Agostino & Pearson test					R squared (eta squared)	0.0007026
1.39	2.02		K2	9.635	1.516
1.99	3.45		P value	0.0081	0.4686			F test to compare variances
4.32	6.66		Passed normality test (alpha=0.05)?	No	Yes			F, DFn, Dfd	1.143, 22, 22
8.97	3.15		P value summary	**	ns			P value	0.7565
								P value summary	ns
			Shapiro-Wilk test					Significantly different (P < 0.05)?	No
			W	0.9204	0.9504
			P value	0.0681	0.298			Data analyzed
			Passed normality test (alpha=0.05)?	Yes	Yes			Sample size, column A	23
			P value summary	ns	ns			Sample size, column B	23
			Kolmogorov-Smirnov test
			KS distance	0.1453	0.1053
			P value	>0.1000	>0.1000
			Passed normality test (alpha=0.05)?	Yes	Yes
			P value summary	ns	ns
			Number of values	23	23

## Sheet: Figure 4H
Figure 4H - eIPSC Charge Trasfer (nc)
WT	KO
Miro1(+/+)	Miro1(Δ/Δ)			Miro1(+/+)	Miro1(Δ/Δ)		Unpaired t test
0.670255	0.431364		Number of values	23	23			Table Analyzed	Fig4H eIPSC charge transfer
0.824275	0.395
0.213664	0.210246		Minimum	0.08677	0.06547			Column B	Miro1(Δ/Δ)
0.885262	0.606565		Maximum	0.8853	0.6334			vs.	vs.
0.394349	0.280091		Range	0.7985	0.5679			Column A	Miro1(+/+)
0.23518	0.361825
0.287733	0.126887		Mean	0.377	0.3344			Unpaired t test
0.244389	0.443445		Std. Deviation	0.2148	0.1643			P value	0.4542
0.348268	0.388814		Std. Error of Mean	0.04479	0.03426			P value summary	ns
0.450811	0.626942							Significantly different (P < 0.05)?	No
0.597113	0.258299			Miro1(+/+)	Miro1(Δ/Δ)			One- or two-tailed P value?	Two-tailed
0.604412	0.633397		Test for normal distribution					t, df	t=0.7552, df=44
0.389427	0.0654698		Anderson-Darling test
0.459326	0.214678		A2*	0.7831	0.2476			How big is the difference?
0.0867735	0.207881		P value	0.0358	0.7226			Mean of column A	0.377
0.184939	0.106286		Passed normality test (alpha=0.05)?	No	Yes			Mean of column B	0.3344
0.220985	0.108934		P value summary	*	ns			Difference between means (B - A) ± SEM	-0.04259 ± 0.05639
0.201893	0.347535							95% confidence interval	-0.1562 to 0.07106
0.145875	0.333295		D'Agostino & Pearson test					R squared (eta squared)	0.0128
0.448131	0.252373		K2	4.461	0.624
0.327408	0.477199		P value	0.1075	0.732			F test to compare variances
0.25638	0.459421		Passed normality test (alpha=0.05)?	Yes	Yes			F, DFn, Dfd	1.709, 22, 22
0.194798	0.356241		P value summary	ns	ns			P value	0.2165
								P value summary	ns
			Shapiro-Wilk test					Significantly different (P < 0.05)?	No
			W	0.9068	0.9611
			P value	0.035	0.4858			Data analyzed
			Passed normality test (alpha=0.05)?	No	Yes			Sample size, column A	23
			P value summary	*	ns			Sample size, column B	23
			Kolmogorov-Smirnov test
			KS distance	0.1476	0.0816
			P value	>0.1000	>0.1000
			Passed normality test (alpha=0.05)?	Yes	Yes
			P value summary	ns	ns
			Number of values	23	23

## Sheet: Figure 4I
Figure 4I - eIPSC Decay (s)
WT	KO			Miro1(+/+)	Miro1(Δ/Δ)		Unpaired t test with Welch's correction
Miro1(+/+)	Miro1(Δ/Δ)		Number of values	20	22			Table Analyzed	Fig4I - eIPSC decay
0.0353762	0.0239581
0.0276017	0.0185325		Minimum	0.008994	0.01198			Column B	Miro1(Δ/Δ)
0.0256144	0.0204018		Maximum	0.03661	0.03266			vs.	vs.
0.0360127			Range	0.02761	0.02068			Column A	Miro1(+/+)
0.0280695	0.0211121
0.0236738	0.0206694		Mean	0.02337	0.02161			Unpaired t test with Welch's correction
0.0220649	0.0227227		Std. Deviation	0.008565	0.004922			P value	0.4253
0.0366085	0.0326561		Std. Error of Mean	0.001915	0.001049			P value summary	ns
0.0358459	0.0159003							Significantly different (P < 0.05)?	No
	0.0163202		Test for normal distribution					One- or two-tailed P value?	Two-tailed
0.0128719	0.0236488		Anderson-Darling test					Welch-corrected t, df	t=0.8085, df=29.70
0.0268049	0.0257445		A2*	0.4413	0.239
0.0151267	0.0130465		P value	0.2606	0.7502			How big is the difference?
0.0277324	0.0232238		Passed normality test (alpha=0.05)?	Yes	Yes			Mean of column A	0.02337
0.02165	0.0287381		P value summary	ns	ns			Mean of column B	0.02161
	0.022294							Difference between means (B - A) ± SEM	-0.001766 ± 0.002184
0.0236868	0.0222113		D'Agostino & Pearson test					95% confidence interval	-0.006228 to 0.002696
0.0139696	0.020028		K2	1.887	0.4986			R squared (eta squared)	0.02153
0.0142969	0.0284898		P value	0.3894	0.7793
	0.0193659		Passed normality test (alpha=0.05)?	Yes	Yes			F test to compare variances
0.0174228	0.0244239		P value summary	ns	ns			F, DFn, Dfd	3.028, 19, 21
0.00899356	0.0198817							P value	0.0158
0.0140226	0.0119779		Shapiro-Wilk test					P value summary	*
			W	0.9358	0.9797			Significantly different (P < 0.05)?	Yes
			P value	0.1992	0.9113
			Passed normality test (alpha=0.05)?	Yes	Yes			Data analyzed
			P value summary	ns	ns			Sample size, column A	20
								Sample size, column B	22
			Kolmogorov-Smirnov test
			KS distance	0.1321	0.1017
			P value	>0.1000	>0.1000
			Passed normality test (alpha=0.05)?	Yes	Yes
			P value summary	ns	ns
			Number of values	20	22

## Sheet: Figure 4K
Figure 4K - Mean amplitude of each peak during the light train stimulation (A)
																																															Multiple t-test per row
Light Pulse Number	Miro1(+/+)																					Miro1(Δ/Δ)																									Discovery?	P value	Mean of Miro(+/+)
1	1.8e-09	3.45e-09	5.73e-09	1.96e-09	1.04e-09	2.97e-09	2.6e-09	3.93e-10	1.7e-10	1.22e-09	6.26e-10	1.18e-09	4.41e-10	2.49e-09	1.2e-09	1.99e-09	4.85e-09	2.66e-09	5.99e-09	3.79e-09	2.18e-09	2.35e-09	2.08e-09	1.25e-09	2.4e-09	4.55e-09	1.17e-09	4.49e-10	4.98e-09	1.39e-09	2.11e-09	1.18e-09	1.32e-09	3.15e-10	4.11e-09	3.56e-09	7.36e-10	1.7e-09	3.18e-09	3.4e-09	4.29e-10	5.39e-09	5.31e-09	2.33e-09	2.8e-09		No	0.810928	2.32e-09
2	3.08e-09	3.78e-09	6.46e-09	4.8e-09	1.42e-09	2.85e-09	2.26e-09	6.1e-10	5.97e-10	9.79e-10	5.09e-10	1.04e-09	6.15e-10	2.08e-09	1.01e-09	1.86e-09	3.09e-09	1.79e-09	3.7e-09	2.29e-09	1.91e-09	4.21e-09	2.22e-09	2.18e-09	2.06e-09	4.68e-09	1.28e-09	5.32e-10	4.19e-09	1.59e-09	1.41e-09	1.54e-09	1.68e-09	2.96e-10	2.84e-09	2.86e-09	7.7e-10	1.81e-09	2.6e-09	2.63e-09	3.98e-10	4.09e-09	4.26e-09	2.05e-09	2.09e-09		No	0.932352	2.225e-09
3	2.65e-09	3.46e-09	5.79e-09	4.08e-09	1.35e-09	2.27e-09	1.94e-09	5.81e-10	5.31e-10	8.43e-10	4.14e-10	9.76e-10	5.48e-10	1.56e-09	8.38e-10	1.68e-09	2.46e-09	1.33e-09	2.9e-09	1.63e-09	1.49e-09	3.72e-09	1.98e-09	1.82e-09	1.69e-09	4.33e-09	9.81e-10	4.6e-10	3.17e-09	1.38e-09	1.31e-09	1.5e-09	1.57e-09	2.75e-10	2.38e-09	2.55e-09	6.76e-10	1.55e-09	2.4e-09	2.17e-09	3.45e-10	3.21e-09	3.45e-09	1.8e-09	1.72e-09		No	0.863278	1.872e-09
4	2.43e-09	3.23e-09	4.53e-09	3.55e-09	1.21e-09	1.82e-09	1.73e-09	5.36e-10	4.46e-10	7.08e-10	3.9e-10	8.2e-10	4.96e-10	1.39e-09	7.59e-10	1.59e-09	2e-09	1.21e-09	2.46e-09	1.2e-09	1.3e-09	3.17e-09	1.7e-09	1.53e-09	1.48e-09	3.63e-09	8.28e-10	4.41e-10	2.7e-09	1.2e-09	1.23e-09	1.38e-09	1.25e-09	2.54e-10	1.97e-09	2.27e-09	6.02e-10	1.46e-09	2.17e-09	1.84e-09	3.28e-10	2.86e-09	2.77e-09	1.76e-09	1.54e-09		No	0.810707	1.61e-09
5	2.2e-09	2.86e-09	4.19e-09	3.18e-09	1.1e-09	1.6e-09	1.56e-09	4.77e-10	4.14e-10	6.55e-10	3.38e-10	7.47e-10	4.59e-10	1.28e-09	7.28e-10	1.46e-09	1.87e-09	1.06e-09	2.05e-09	1.06e-09	1.17e-09	2.76e-09	1.56e-09	1.45e-09	1.37e-09	3.22e-09	7.38e-10	3.95e-10	2.44e-09	1.05e-09	1.11e-09	1.28e-09	1.07e-09	2.34e-10	1.69e-09	2e-09	5.72e-10	1.27e-09	1.83e-09	1.59e-09	2.91e-10	2.55e-09	2.52e-09	1.51e-09	1.41e-09		No	0.864569	1.45e-09
6	2.02e-09	2.8e-09	3.94e-09	2.9e-09	1e-09	1.53e-09	1.44e-09	4.26e-10	3.64e-10	5.94e-10	3.1e-10	6.93e-10	4.21e-10	1.13e-09	5.88e-10	1.39e-09	1.71e-09	9.4e-10	1.9e-09	9.33e-10	9.97e-10	2.34e-09	1.42e-09	1.34e-09	1.27e-09	3.11e-09	6.99e-10	3.65e-10	2.43e-09	9.39e-10	1.04e-09	1.19e-09	1.02e-09	2.32e-10	1.52e-09	1.8e-09	5.41e-10	1.26e-09	1.62e-09	1.48e-09	2.45e-10	2.27e-09	2.37e-09	1.35e-09	1.34e-09		No	0.848402	1.335e-09
7	1.92e-09	2.62e-09	3.94e-09	2.79e-09	9.36e-10	1.41e-09	1.4e-09	4.12e-10	3.44e-10	5.44e-10	3.12e-10	6.2e-10	3.94e-10	1.12e-09	5.81e-10	1.36e-09	1.51e-09	8.65e-10	1.68e-09	8.16e-10	1.04e-09	2.16e-09	1.41e-09	1.34e-09	1.2e-09	3.01e-09	6.83e-10	3.76e-10	2.38e-09	9e-10	1.02e-09	1.15e-09	9.34e-10	2.23e-10	1.48e-09	1.66e-09	5.05e-10	1.15e-09	1.43e-09	1.31e-09	2.34e-10	2.06e-09	2.22e-09	1.24e-09	1.22e-09		No	0.880532	1.267e-09
8	1.9e-09	2.6e-09	3.73e-09	2.64e-09	8.74e-10	1.43e-09	1.43e-09	3.85e-10	3.45e-10	5.4e-10	3.13e-10	5.75e-10	3.7e-10	1.09e-09	5.41e-10	1.3e-09	1.47e-09	7.39e-10	1.68e-09	7.89e-10	1.02e-09	2.01e-09	1.38e-09	1.25e-09	1.2e-09	2.89e-09	7.15e-10	3.59e-10	2.37e-09	8.79e-10	9.85e-10	1.12e-09	9.43e-10	2.2e-10	1.26e-09	1.52e-09	5.06e-10	1.06e-09	1.43e-09	1.16e-09	2.63e-10	1.82e-09	2.09e-09	1.22e-09	1.13e-09		No	0.951561	1.227e-09
9	1.84e-09	2.54e-09	3.84e-09	2.57e-09	8.85e-10	1.4e-09	1.39e-09	3.65e-10	3.46e-10	5.1e-10	2.99e-10	5.58e-10	3.52e-10	9.68e-10	5.63e-10	1.24e-09	1.22e-09	6.45e-10	1.6e-09	8.2e-10	1.01e-09	1.99e-09	1.33e-09	1.23e-09	1.14e-09	2.8e-09	6.36e-10	3.6e-10	2.32e-09	9.1e-10	9.72e-10	1.1e-09	9.3e-10	2.14e-10	1.18e-09	1.55e-09	4.74e-10	9.95e-10	1.35e-09	1.03e-09	2.16e-10	1.82e-09	1.96e-09	1.08e-09	1.06e-09		No	0.982765	1.189e-09
10	1.91e-09	2.4e-09	3.94e-09	2.52e-09	8.36e-10	1.31e-09	1.39e-09	3.43e-10	2.94e-10	5.08e-10	2.9e-10	4.95e-10	3.29e-10	9.16e-10	4.87e-10	1.25e-09	1.16e-09	6.91e-10	1.37e-09	7.47e-10	9.48e-10	2.03e-09	1.34e-09	1.22e-09	1.18e-09	2.85e-09	6.69e-10	3.71e-10	2.31e-09	8.63e-10	9.54e-10	1.09e-09	9.33e-10	2.06e-10	1.1e-09	1.44e-09	4.57e-10	9.99e-10	1.35e-09	1.1e-09	2.05e-10	1.73e-09	1.9e-09	9.67e-10	1.03e-09		No	0.898943	1.149e-09
11	1.8e-09	2.3e-09	3.75e-09	2.36e-09	8.12e-10	1.26e-09	1.38e-09	3.42e-10	3.18e-10	4.79e-10	3.26e-10	5.32e-10	3.14e-10	9.28e-10	4.54e-10	1.21e-09	1.14e-09	6.28e-10	1.4e-09	7.25e-10	9.71e-10	1.88e-09	1.24e-09	1.23e-09	1.18e-09	2.9e-09	6.52e-10	3.48e-10	2.24e-09	8.48e-10	9.17e-10	1.08e-09	8.98e-10	2.13e-10	1.05e-09	1.45e-09	4.44e-10	1.06e-09	1.23e-09	9.75e-10	1.88e-10	1.61e-09	2.06e-09	9.35e-10	9.77e-10		No	0.878335	1.116e-09
12	1.84e-09	2.26e-09	3.69e-09	2.35e-09	8.16e-10	1.22e-09	1.4e-09	3.38e-10	3.14e-10	4.54e-10	2.97e-10	4.86e-10	3.09e-10	9.31e-10	4.59e-10	1.12e-09	1.11e-09	6.15e-10	1.34e-09	6.92e-10	9.3e-10	1.92e-09	1.23e-09	1.26e-09	1.11e-09	2.87e-09	5.77e-10	3.53e-10	2.24e-09	8.57e-10	8.76e-10	1.05e-09	9.01e-10	2.1e-10	9.72e-10	1.42e-09	4.41e-10	1.01e-09	1.2e-09	9.32e-10	1.99e-10	1.49e-09	1.86e-09	1.01e-09	1.01e-09		No	0.889081	1.094e-09
13	1.81e-09	2.13e-09	3.63e-09	2.26e-09	7.78e-10	1.3e-09	1.3e-09	3.14e-10	3.07e-10	4.5e-10	2.72e-10	4.94e-10	3.01e-10	9.61e-10	4.6e-10	1.11e-09	9.97e-10	5.77e-10	1.36e-09	6.9e-10	8.96e-10	1.92e-09	1.14e-09	1.22e-09	1.1e-09	2.73e-09	6.05e-10	3.44e-10	2.09e-09	8.51e-10	8.69e-10	1.09e-09	8.7e-10	1.92e-10	9.02e-10	1.44e-09	4.22e-10	9.25e-10	1.25e-09	9.04e-10	2.87e-10	1.48e-09	1.75e-09	9.38e-10	9.8e-10		No	0.891551	1.067e-09
14	1.79e-09	2.14e-09	3.65e-09	2.27e-09	7.53e-10	1.27e-09	1.36e-09	3.2e-10	2.93e-10	4.48e-10	2.95e-10	4.67e-10	2.81e-10	9.04e-10	4.52e-10	1.13e-09	9.83e-10	5.82e-10	1.31e-09	6.31e-10	8.77e-10	1.85e-09	1.12e-09	1.18e-09	1.08e-09	2.84e-09	5.89e-10	3.29e-10	2.19e-09	8.09e-10	8.55e-10	1.09e-09	8.77e-10	1.96e-10	8.6e-10	1.38e-09	4.26e-10	9.22e-10	1.16e-09	8.49e-10	2.47e-10	1.36e-09	1.72e-09	9.26e-10	9.21e-10		No	0.939424	1.057e-09
15	1.78e-09	2.15e-09	3.65e-09	2.19e-09	7.31e-10	1.22e-09	1.32e-09	3.16e-10	2.86e-10	4.55e-10	2.77e-10	4.19e-10	2.79e-10	8.26e-10	4.36e-10	1.06e-09	1.05e-09	5.74e-10	1.2e-09	6.33e-10	8.99e-10	1.83e-09	1.15e-09	1.18e-09	1.04e-09	2.74e-09	5.87e-10	3.46e-10	2.07e-09	8.45e-10	8.35e-10	1.06e-09	8.36e-10	2e-10	9.1e-10	1.31e-09	3.89e-10	9.03e-10	1.2e-09	7.92e-10	2.01e-10	1.34e-09	1.72e-09	8.88e-10	8.52e-10		No	0.943485	1.036e-09
16	1.79e-09	2.05e-09	3.52e-09	2.15e-09	7.3e-10	1.18e-09	1.31e-09	3.04e-10	2.82e-10	4.46e-10	2.77e-10	4.32e-10	2.8e-10	8.31e-10	4.06e-10	1.06e-09	9.63e-10	4.86e-10	1.2e-09	6.39e-10	8.33e-10	1.76e-09	1.09e-09	1.23e-09	1.05e-09	2.76e-09	5.47e-10	3.58e-10	2.16e-09	8.21e-10	8.28e-10	1.01e-09	8.72e-10	2e-10	9.4e-10	1.23e-09	4.16e-10	8.4e-10	1.19e-09	8.46e-10	1.73e-10	1.37e-09	1.77e-09	8.89e-10	8.34e-10		No	0.845706	1.008e-09
17	1.78e-09	2.08e-09	3.62e-09	2.06e-09	6.94e-10	1.13e-09	1.28e-09	3.04e-10	2.62e-10	4.5e-10	2.61e-10	3.96e-10	2.83e-10	7.95e-10	4.69e-10	1.03e-09	8.87e-10	5.25e-10	1.2e-09	6.07e-10	8.45e-10	1.7e-09	1.06e-09	1.12e-09	1.06e-09	2.49e-09	5.38e-10	3.26e-10	1.97e-09	8.36e-10	8.09e-10	1.01e-09	7.82e-10	2.02e-10	8.44e-10	1.23e-09	4.16e-10	8.3e-10	1.19e-09	7.96e-10	1.87e-10	1.21e-09	1.59e-09	8.73e-10	7.92e-10		No	0.98532	9.98e-10
18	1.73e-09	2.1e-09	3.45e-09	2.12e-09	7.36e-10	1.09e-09	1.31e-09	2.99e-10	2.6e-10	4.29e-10	2.94e-10	4.14e-10	2.65e-10	8.03e-10	4.24e-10	1.03e-09	9.67e-10	5.13e-10	1.22e-09	5.9e-10	7.88e-10	1.7e-09	1.11e-09	1.19e-09	9.97e-10	2.66e-09	5.72e-10	3.43e-10	2.1e-09	7.87e-10	7.94e-10	1.02e-09	8.14e-10	1.92e-10	8.5e-10	1.23e-09	4.03e-10	8.18e-10	1.08e-09	7.31e-10	1.56e-10	1.28e-09	1.57e-09	8.65e-10	7.96e-10		No	0.959873	9.92e-10
19	1.73e-09	2.03e-09	3.49e-09	2.06e-09	7.08e-10	1.14e-09	1.27e-09	2.96e-10	2.57e-10	4.41e-10	2.85e-10	4.13e-10	2.61e-10	8.28e-10	3.88e-10	1.01e-09	9.13e-10	5.2e-10	1.11e-09	5.06e-10	8.03e-10	1.71e-09	1.04e-09	1.18e-09	1e-09	2.55e-09	5.79e-10	3.11e-10	2.06e-09	8e-10	7.69e-10	1.02e-09	7.91e-10	2e-10	7.95e-10	1.19e-09	3.66e-10	7.76e-10	1.11e-09	7.24e-10	1.74e-10	1.18e-09	1.53e-09	8.44e-10	7.8e-10		No	0.984202	9.742e-10
20	1.7e-09	2.08e-09	3.46e-09	2.03e-09	6.91e-10	1.15e-09	1.24e-09	2.9e-10	2.6e-10	4.43e-10	2.6e-10	4.01e-10	2.48e-10	7.91e-10	3.69e-10	1.03e-09	9.42e-10	4.64e-10	1.2e-09	5.28e-10	7.58e-10	1.74e-09	1.01e-09	1.09e-09	9.83e-10	2.57e-09	5.39e-10	3.26e-10	1.98e-09	7.8e-10	7.98e-10	1.02e-09	7.76e-10	2.02e-10	8.51e-10	1.21e-09	3.76e-10	8e-10	1.07e-09	7.11e-10	1.63e-10	1.16e-09	1.53e-09	8.25e-10	7.6e-10		No	0.995121	9.683e-10
21	1.68e-09	1.94e-09	3.42e-09	1.93e-09	6.95e-10	1.06e-09	1.27e-09	2.83e-10	2.36e-10	4.04e-10	2.55e-10	3.78e-10	2.54e-10	7.47e-10	4.01e-10	9.5e-10	9.49e-10	4.43e-10	1.05e-09	4.95e-10	8.47e-10	1.74e-09	1.09e-09	1.09e-09	9.52e-10	2.51e-09	5.16e-10	3.22e-10	1.93e-09	7.92e-10	7.85e-10	9.85e-10	8.32e-10	1.9e-10	7.14e-10	1.14e-09	3.47e-10	7.62e-10	1.05e-09	7.11e-10	1.45e-10	1.12e-09	1.44e-09	8.58e-10	7.92e-10		No	0.947746	9.375e-10
22	1.69e-09	1.93e-09	3.33e-09	1.99e-09	7.09e-10	1.21e-09	1.23e-09	3.11e-10	2.48e-10	3.97e-10	2.71e-10	3.62e-10	2.68e-10	7.16e-10	3.95e-10	9.88e-10	8.77e-10	4.42e-10	9.54e-10	4.5e-10	8.11e-10	1.67e-09	1.01e-09	1.11e-09	9.15e-10	2.49e-09	5.6e-10	3.02e-10	1.95e-09	7.74e-10	7.87e-10	9.54e-10	8.55e-10	1.88e-10	8e-10	1.04e-09	3.39e-10	7.19e-10	1.09e-09	6.52e-10	1.54e-10	1.04e-09	1.48e-09	8.54e-10	8.12e-10		No	0.971491	9.323e-10
23	1.69e-09	1.9e-09	3.47e-09	1.99e-09	6.69e-10	1.15e-09	1.24e-09	3e-10	2.4e-10	4.16e-10	2.48e-10	3.52e-10	2.38e-10	7.28e-10	4.1e-10	9.66e-10	9.5e-10	3.46e-10	9.95e-10	4.56e-10	7.99e-10	1.71e-09	9.91e-10	1.09e-09	9.58e-10	2.57e-09	4.98e-10	3.2e-10	1.95e-09	7.47e-10	7.93e-10	9.72e-10	7.84e-10	1.96e-10	7.3e-10	1.19e-09	3.12e-10	7.97e-10	9.64e-10	6.6e-10	1.61e-10	1.05e-09	1.38e-09	8.45e-10	7.09e-10		No	0.994969	9.311e-10
24	1.71e-09	1.9e-09	3.28e-09	1.92e-09	6.65e-10	1.03e-09	1.18e-09	2.92e-10	2.46e-10	4.05e-10	2.6e-10	3.68e-10	2.43e-10	8.26e-10	3.85e-10	8.86e-10	8.8e-10	3.63e-10	1.04e-09	4.44e-10	7.79e-10	1.67e-09	1e-09	1.07e-09	8.85e-10	2.52e-09	5.31e-10	3.16e-10	1.91e-09	7.55e-10	7.64e-10	9.97e-10	8.37e-10	1.86e-10	6.9e-10	1.13e-09	3.32e-10	7.37e-10	9.33e-10	6.03e-10	1.6e-10	1.09e-09	1.39e-09	7.59e-10	7.79e-10		No	0.963754	9.096e-10
25	1.66e-09	1.84e-09	3.37e-09	1.89e-09	6.71e-10	1.04e-09	1.19e-09	2.9e-10	2.31e-10	3.89e-10	2.5e-10	3.47e-10	2.42e-10	7.87e-10	3.56e-10	8.97e-10	8.11e-10	3.55e-10	1.11e-09	4.6e-10	6.92e-10	1.56e-09	9.74e-10	1.08e-09	9.39e-10	2.43e-09	4.89e-10	3.03e-10	1.91e-09	7.63e-10	7.66e-10	9.12e-10	7.75e-10	1.81e-10	6.59e-10	9.47e-10	3.17e-10	6.85e-10	1.01e-09	5.72e-10	1.52e-10	1.08e-09	1.34e-09	7.84e-10	7.83e-10		No	0.972102	8.99e-10
26	1.66e-09	1.83e-09	3.18e-09	1.89e-09	6.59e-10	1.02e-09	1.21e-09	2.82e-10	2.47e-10	4.03e-10	2.56e-10	3.56e-10	2.49e-10	7.48e-10	3.68e-10	8.52e-10	8.41e-10	2.9e-10	1.05e-09	4.93e-10	6.95e-10	1.54e-09	9.93e-10	1.07e-09	9.44e-10	2.51e-09	4.99e-10	3.23e-10	1.97e-09	7.54e-10	7.18e-10	9.01e-10	7.54e-10	1.84e-10	6.95e-10	1.04e-09	3.36e-10	7.08e-10	9.79e-10	5.72e-10	1.31e-10	1.06e-09	1.32e-09	7.35e-10	6.85e-10		No	0.967485	8.847e-10
27	1.64e-09	1.86e-09	3.21e-09	1.9e-09	6.78e-10	1.06e-09	1.16e-09	2.89e-10	2.37e-10	3.63e-10	2.52e-10	3.74e-10	2.22e-10	6.96e-10	3.67e-10	9.1e-10	8.19e-10	3.68e-10	8.98e-10	4.06e-10	6.94e-10	1.64e-09	9.59e-10	1.1e-09	8.85e-10	2.46e-09	4.89e-10	3.1e-10	1.89e-09	7.64e-10	7.37e-10	9.65e-10	7.36e-10	1.78e-10	7.11e-10	1e-09	3.16e-10	7.11e-10	1.05e-09	5.46e-10	1.47e-10	1e-09	1.36e-09	7.31e-10	6.96e-10		No	0.93979	8.763e-10
28	1.64e-09	1.87e-09	3.22e-09	1.89e-09	6.42e-10	1.17e-09	1.19e-09	2.82e-10	2.43e-10	3.92e-10	2.38e-10	3.39e-10	2.33e-10	6.75e-10	3.32e-10	9.11e-10	8.04e-10	3.5e-10	9.92e-10	4.07e-10	6.98e-10	1.54e-09	9.6e-10	1.05e-09	9.39e-10	2.42e-09	4.93e-10	3.13e-10	1.79e-09	7.22e-10	7.47e-10	9.44e-10	8.13e-10	1.73e-10	6.75e-10	9.96e-10	3.17e-10	7e-10	9.42e-10	5.01e-10	1.36e-10	8.55e-10	1.28e-09	7.2e-10	6.69e-10		No	0.918552	8.818e-10
29	1.62e-09	1.85e-09	3.19e-09	1.83e-09	6.55e-10	1.03e-09	1.15e-09	2.61e-10	2.31e-10	4.27e-10	2.33e-10	3.76e-10	2.23e-10	7.47e-10	3.41e-10	8.48e-10	9.26e-10	3.32e-10	9.23e-10	3.44e-10	7.02e-10	1.61e-09	9.2e-10	1.09e-09	9.11e-10	2.39e-09	5.27e-10	3.2e-10	1.87e-09	7.46e-10	7.34e-10	9.05e-10	8.27e-10	1.84e-10	6.16e-10	9.31e-10	2.88e-10	6.05e-10	9.15e-10	5.57e-10	1.45e-10	9.07e-10	1.24e-09	7.03e-10	7e-10		No	0.964252	8.685e-10
30	1.66e-09	1.82e-09	3.19e-09	1.77e-09	6.53e-10	1.09e-09	1.12e-09	2.85e-10	2.31e-10	3.87e-10	2.34e-10	3.49e-10	2.16e-10	6.54e-10	3.86e-10	8.22e-10	7.71e-10	3.28e-10	9.22e-10	4.12e-10	7.49e-10	1.55e-09	9.19e-10	1.09e-09	8.71e-10	2.44e-09	5.05e-10	3.11e-10	1.8e-09	7.45e-10	7.03e-10	8.9e-10	7.89e-10	1.79e-10	5.88e-10	9.69e-10	2.85e-10	6.59e-10	9.09e-10	4.96e-10	1.21e-10	9.32e-10	1.27e-09	7.52e-10	7.09e-10		No	0.974396	8.595e-10
31	1.65e-09	1.84e-09	3.12e-09	1.83e-09	6.43e-10	1e-09	1.15e-09	2.76e-10	2.09e-10	4.11e-10	2.42e-10	3.44e-10	2.1e-10	7.55e-10	3.19e-10	8.46e-10	8.15e-10	2.92e-10	9.48e-10	3.38e-10	6.98e-10	1.52e-09	9.38e-10	1.01e-09	9.39e-10	2.32e-09	4.51e-10	2.91e-10	1.76e-09	7.32e-10	7.44e-10	8.81e-10	8.12e-10	1.9e-10	6.65e-10	9.49e-10	2.98e-10	6.71e-10	9.1e-10	4.76e-10	1.21e-10	9.28e-10	1.2e-09	6.71e-10	6.11e-10		No	0.926706	8.541e-10
32	1.56e-09	1.83e-09	3.19e-09	1.75e-09	6.51e-10	9.91e-10	1.14e-09	3e-10	2.2e-10	3.71e-10	2.32e-10	3.36e-10	2.08e-10	6.84e-10	3.58e-10	8.29e-10	7.11e-10	2.86e-10	8.89e-10	3.76e-10	7.15e-10	1.53e-09	9.68e-10	1.05e-09	8.68e-10	2.43e-09	4.56e-10	3.03e-10	1.82e-09	7.15e-10	7.17e-10	9.1e-10	7.61e-10	1.79e-10	5.73e-10	9.88e-10	2.85e-10	6.24e-10	9.32e-10	4.54e-10	1.18e-10	8.72e-10	1.11e-09	7.39e-10	6.66e-10		No	0.986394	8.394e-10
33	1.59e-09	1.84e-09	3.05e-09	1.79e-09	6.3e-10	1.14e-09	1.12e-09	2.64e-10	2.18e-10	3.63e-10	1.91e-10	3.42e-10	2.01e-10	6.41e-10	3.38e-10	8.04e-10	8.37e-10	2.88e-10	8.45e-10	3.43e-10	6.96e-10	1.45e-09	9.6e-10	1.02e-09	8.69e-10	2.29e-09	4.7e-10	2.92e-10	1.76e-09	6.85e-10	7.03e-10	9.18e-10	7.82e-10	1.82e-10	6.35e-10	9.14e-10	2.79e-10	6.13e-10	9.27e-10	4.89e-10	1.08e-10	8.88e-10	1.23e-09	6.57e-10	6.61e-10		No	0.954121	8.348e-10
34	1.55e-09	1.75e-09	3.02e-09	1.78e-09	6.27e-10	1.07e-09	1.11e-09	2.62e-10	2.37e-10	3.7e-10	2.1e-10	3.25e-10	2.08e-10	6.92e-10	3.74e-10	7.54e-10	7.81e-10	2.66e-10	7.98e-10	3.31e-10	6.89e-10	1.54e-09	9.27e-10	1.04e-09	8.69e-10	2.26e-09	4.52e-10	3.05e-10	1.74e-09	7.36e-10	7.12e-10	8.83e-10	7.56e-10	1.74e-10	5.22e-10	8.99e-10	2.6e-10	6.04e-10	8.86e-10	4.88e-10	1.53e-10	9.17e-10	1.13e-09	7.03e-10	6.81e-10		No	0.995443	8.192e-10
35	1.59e-09	1.81e-09	3.12e-09	1.75e-09	6.34e-10	1.07e-09	1.13e-09	2.5e-10	2.19e-10	3.67e-10	2.14e-10	3.11e-10	2.16e-10	6.45e-10	3.59e-10	6.81e-10	7.88e-10	2.44e-10	8.1e-10	3.42e-10	6.63e-10	1.47e-09	9.25e-10	1.05e-09	8.66e-10	2.27e-09	4.89e-10	3e-10	1.77e-09	6.91e-10	7.08e-10	9.28e-10	7.49e-10	1.73e-10	5.53e-10	8.84e-10	2.8e-10	6.02e-10	8.84e-10	4.47e-10	1.39e-10	8.5e-10	1.19e-09	6.89e-10	6.43e-10		No	0.978015	8.197e-10
36	1.54e-09	1.68e-09	3.2e-09	1.71e-09	6.02e-10	1.01e-09	1.08e-09	2.59e-10	2.15e-10	3.9e-10	2.21e-10	3.33e-10	2.28e-10	6.77e-10	3e-10	7.18e-10	7.84e-10	2.66e-10	8.71e-10	3.04e-10	6.21e-10	1.47e-09	9.6e-10	1.02e-09	8.09e-10	2.29e-09	4.69e-10	3.06e-10	1.67e-09	7.11e-10	7.14e-10	8.73e-10	7.47e-10	1.77e-10	5.51e-10	7.61e-10	2.7e-10	6.22e-10	8.76e-10	5.18e-10	1.26e-10	8.15e-10	1.17e-09	6.64e-10	5.34e-10		No	0.942775	8.1e-10
37	1.58e-09	1.77e-09	3.02e-09	1.82e-09	6.47e-10	1.01e-09	1.1e-09	2.71e-10	2.11e-10	3.6e-10	2.03e-10	3.16e-10	2.17e-10	6.23e-10	3.57e-10	7.46e-10	8.22e-10	2.38e-10	7.89e-10	3.33e-10	6.41e-10	1.44e-09	8.74e-10	1.02e-09	8.91e-10	2.23e-09	4.52e-10	3.09e-10	1.73e-09	7.05e-10	6.63e-10	8.52e-10	7.64e-10	1.74e-10	4.97e-10	8.45e-10	2.93e-10	6.23e-10	8.57e-10	3.91e-10	1.27e-10	7.9e-10	1.09e-09	6.47e-10	5.51e-10		No	0.872153	8.13e-10
38	1.59e-09	1.77e-09	3e-09	1.77e-09	6.36e-10	9.65e-10	1.11e-09	2.53e-10	2.09e-10	3.72e-10	2.02e-10	3.49e-10	2.04e-10	6.42e-10	3.2e-10	6.7e-10	7.62e-10	2.2e-10	7.17e-10	3.24e-10	6.62e-10	1.41e-09	9.23e-10	1.04e-09	9.04e-10	2.26e-09	4.39e-10	2.89e-10	1.67e-09	6.88e-10	7.14e-10	8.41e-10	7.24e-10	1.79e-10	5.57e-10	8.31e-10	2.63e-10	5.57e-10	8.4e-10	4.29e-10	1.26e-10	8.23e-10	1e-09	6.42e-10	6.01e-10		No	0.92801	7.975e-10
39	1.57e-09	1.67e-09	3.13e-09	1.75e-09	6.16e-10	9.55e-10	1.1e-09	2.59e-10	1.99e-10	3.44e-10	2.39e-10	3.15e-10	1.96e-10	6.07e-10	3.38e-10	6.81e-10	6.66e-10	2.08e-10	8.18e-10	2.96e-10	5.85e-10	1.45e-09	9.05e-10	9.48e-10	8.52e-10	2.33e-09	4.37e-10	2.99e-10	1.67e-09	7.05e-10	7.05e-10	8.63e-10	7.26e-10	1.7e-10	5.3e-10	8.58e-10	2.56e-10	5.56e-10	8.01e-10	3.92e-10	1.02e-10	7.7e-10	1.06e-09	6.48e-10	5.8e-10		No	0.947245	7.877e-10
40	1.54e-09	1.68e-09	2.91e-09	1.66e-09	6.04e-10	1.01e-09	1.05e-09	2.58e-10	2.19e-10	3.48e-10	2.12e-10	2.94e-10	2.12e-10	6.51e-10	3.19e-10	6.46e-10	8.07e-10	2.38e-10	7.53e-10	3.27e-10	6.3e-10	1.37e-09	9.09e-10	9.52e-10	8.51e-10	2.1e-09	4.37e-10	2.81e-10	1.7e-09	6.81e-10	7.1e-10	8.95e-10	6.76e-10	1.66e-10	4.96e-10	8.12e-10	2.29e-10	5.57e-10	8.5e-10	3.8e-10	1.17e-10	7.53e-10	1.06e-09	7.24e-10	6.15e-10		No	0.925932	7.794e-10
41	1.52e-09	1.75e-09	2.91e-09	1.7e-09	5.88e-10	9.82e-10	1.08e-09	2.63e-10	2.12e-10	3.85e-10	2.29e-10	3.13e-10	1.96e-10	5.84e-10	2.73e-10	6.63e-10	7.65e-10	2.11e-10	7.01e-10	3.01e-10	6.24e-10	1.4e-09	8.95e-10	1.01e-09	8.33e-10	2.35e-09	4.51e-10	2.97e-10	1.75e-09	6.51e-10	6.91e-10	8.41e-10	7.13e-10	1.61e-10	4.89e-10	7.18e-10	2.26e-10	5.05e-10	8.03e-10	3.41e-10	1.18e-10	7.41e-10	9.86e-10	6.71e-10	5.26e-10		No	0.925281	7.738e-10
42	1.47e-09	1.69e-09	2.93e-09	1.66e-09	6.06e-10	9.7e-10	1.07e-09	2.55e-10	2.06e-10	3.74e-10	2.15e-10	3.48e-10	2.02e-10	5.63e-10	2.94e-10	6.19e-10	8.09e-10	1.85e-10	7.2e-10	3.1e-10	5.97e-10	1.41e-09	8.86e-10	9.64e-10	8.68e-10	2.28e-09	4.21e-10	2.8e-10	1.67e-09	7.05e-10	6.79e-10	8.86e-10	6.81e-10	1.72e-10	4.8e-10	8.06e-10	2.57e-10	5.51e-10	8.27e-10	3.67e-10	1.21e-10	7.54e-10	1.06e-09	6.96e-10	5.23e-10		No	0.990958	7.663e-10
43	1.52e-09	1.68e-09	2.98e-09	1.69e-09	5.88e-10	9.7e-10	1.05e-09	2.61e-10	2.04e-10	3.46e-10	1.89e-10	2.94e-10	2.03e-10	6e-10	3.21e-10	6.31e-10	7.21e-10	1.93e-10	7.24e-10	2.62e-10	6.02e-10	1.36e-09	8.22e-10	9.9e-10	8.38e-10	2.18e-09	4.56e-10	2.83e-10	1.65e-09	6.68e-10	6.74e-10	8.24e-10	7.3e-10	1.76e-10	4.83e-10	7.78e-10	2.42e-10	5.83e-10	8.06e-10	3.59e-10	1.05e-10	7.04e-10	1e-09	6.49e-10	5.53e-10		No	0.923556	7.633e-10
44	1.47e-09	1.7e-09	2.9e-09	1.71e-09	5.78e-10	9.09e-10	1.07e-09	2.42e-10	1.97e-10	3.68e-10	2.31e-10	2.91e-10	1.88e-10	6.26e-10	3.01e-10	6.26e-10	6.66e-10	1.88e-10	7.32e-10	2.74e-10	6.09e-10	1.43e-09	8.55e-10	1.02e-09	8.53e-10	2.21e-09	4.34e-10	2.95e-10	1.69e-09	6.87e-10	6.77e-10	8.84e-10	7.06e-10	1.71e-10	4.78e-10	7.29e-10	2.26e-10	5.12e-10	7.44e-10	3.34e-10	1.1e-10	7.52e-10	9.42e-10	6.16e-10	5.48e-10		No	0.954519	7.56e-10
45	1.51e-09	1.63e-09	2.89e-09	1.65e-09	5.9e-10	9.01e-10	1.08e-09	2.65e-10	1.94e-10	3.42e-10	1.9e-10	3.2e-10	1.77e-10	6.08e-10	3.25e-10	6.28e-10	7.31e-10	1.75e-10	6.97e-10	2.73e-10	5.95e-10	1.4e-09	8.96e-10	9.88e-10	8.18e-10	2.13e-09	4.19e-10	2.92e-10	1.58e-09	6.84e-10	6.87e-10	8.51e-10	6.77e-10	1.77e-10	4.44e-10	7.52e-10	2.08e-10	4.73e-10	7.18e-10	4.19e-10	9.44e-11	7.61e-10	9.43e-10	6.3e-10	5.46e-10		No	0.915819	7.51e-10
46	1.51e-09	1.65e-09	2.88e-09	1.61e-09	5.58e-10	9.86e-10	1.05e-09	2.51e-10	2.08e-10	3.67e-10	1.98e-10	2.97e-10	2.1e-10	5.48e-10	3.04e-10	6.2e-10	6.95e-10	1.81e-10	6.22e-10	3.1e-10	5.43e-10	1.34e-09	8.27e-10	1.03e-09	8.23e-10	2.23e-09	4.32e-10	2.75e-10	1.65e-09	6.77e-10	6.88e-10	8.15e-10	7.72e-10	1.66e-10	4.5e-10	7.13e-10	2.11e-10	5.1e-10	7.86e-10	3.21e-10	1.01e-10	7.51e-10	9.88e-10	5.71e-10	5.44e-10		No	0.970392	7.428e-10
47	1.51e-09	1.65e-09	2.97e-09	1.68e-09	5.76e-10	9.61e-10	1.05e-09	2.39e-10	2.07e-10	3.6e-10	2.38e-10	2.8e-10	1.91e-10	5.96e-10	2.66e-10	6.12e-10	6.54e-10	1.75e-10	6.22e-10	2.95e-10	5.54e-10	1.33e-09	8.09e-10	9.92e-10	8.27e-10	2.19e-09	4.37e-10	2.84e-10	1.65e-09	6.97e-10	6.61e-10	8.57e-10	6.85e-10	1.64e-10	4.74e-10	7.18e-10	2.06e-10	4.96e-10	7.66e-10	3.15e-10	1.11e-10	7.47e-10	9.26e-10	6.1e-10	5.18e-10		No	0.914118	7.47e-10
48	1.48e-09	1.65e-09	2.96e-09	1.61e-09	5.87e-10	9.45e-10	9.93e-10	2.38e-10	2.05e-10	3.5e-10	2.12e-10	2.9e-10	1.82e-10	5.34e-10	2.49e-10	5.76e-10	6.58e-10	1.86e-10	5.73e-10	3.2e-10	6.31e-10	1.4e-09	8.35e-10	9.95e-10	8.19e-10	2.09e-09	4.27e-10	2.84e-10	1.61e-09	6.85e-10	6.52e-10	8.01e-10	7.14e-10	1.62e-10	4.51e-10	6.55e-10	2.28e-10	4.37e-10	6.97e-10	3.23e-10	9.83e-11	7.17e-10	9.53e-10	5.87e-10	5.18e-10		No	0.905636	7.347e-10
49	1.47e-09	1.63e-09	2.96e-09	1.6e-09	6.13e-10	9.37e-10	1.05e-09	2.63e-10	1.81e-10	3.87e-10	1.85e-10	2.75e-10	1.84e-10	5.42e-10	2.45e-10	5.62e-10	6.37e-10	1.48e-10	6.48e-10	2.6e-10	6.35e-10	1.34e-09	8.14e-10	1e-09	8.6e-10	2.13e-09	4.05e-10	2.94e-10	1.57e-09	7.02e-10	6.87e-10	8.12e-10	6.85e-10	1.62e-10	4.33e-10	6.53e-10	2.16e-10	5.16e-10	7.1e-10	3e-10	9.25e-11	6.25e-10	8.87e-10	5.48e-10	5.43e-10		No	0.880281	7.339e-10
50	1.49e-09	1.63e-09	2.94e-09	1.62e-09	6.05e-10	9.45e-10	1.04e-09	2.44e-10	1.92e-10	3.57e-10	2.04e-10	2.98e-10	1.8e-10	5.81e-10	3.08e-10	5.5e-10	7.09e-10	1.38e-10	6.14e-10	2.7e-10	5.77e-10	1.35e-09	8.16e-10	1.01e-09	8.43e-10	2.09e-09	4.18e-10	2.84e-10	1.54e-09	6.6e-10	6.67e-10	8.34e-10	6.97e-10	1.68e-10	3.96e-10	6.93e-10	2.19e-10	5.17e-10	6.94e-10	2.83e-10	8.79e-11	6.97e-10	9.89e-10	5.25e-10	4.91e-10		No	0.8595	7.377e-10
51	1.45e-09	1.63e-09	2.81e-09	1.6e-09	5.65e-10	8.75e-10	1e-09	2.55e-10	2.02e-10	3.51e-10	2.16e-10	2.67e-10	1.98e-10	5.22e-10	3.05e-10	5.74e-10	6.33e-10	1.47e-10	6.39e-10	2.63e-10	5.37e-10	1.4e-09	8.48e-10	9.39e-10	7.72e-10	2.25e-09	4.03e-10	2.71e-10	1.54e-09	6.83e-10	6.52e-10	8.27e-10	7.07e-10	1.69e-10	3.99e-10	6.2e-10	2.02e-10	4.91e-10	6.74e-10	3.09e-10	9.57e-11	6.43e-10	9.06e-10	5.52e-10	4.89e-10		No	0.933236	7.161e-10
52	1.51e-09	1.63e-09	2.71e-09	1.59e-09	5.4e-10	9.05e-10	1.04e-09	2.51e-10	1.95e-10	3.2e-10	1.98e-10	2.9e-10	1.85e-10	5.48e-10	2.72e-10	5.4e-10	6.18e-10	1.72e-10	6.27e-10	2.37e-10	5.37e-10	1.38e-09	7.92e-10	9.23e-10	8.35e-10	2.09e-09	4.3e-10	2.82e-10	1.65e-09	6.7e-10	6.58e-10	8.07e-10	7.62e-10	1.73e-10	3.89e-10	5.97e-10	2.04e-10	4.97e-10	7.2e-10	3.07e-10	1.3e-10	6.02e-10	8.77e-10	5.58e-10	4.62e-10		No	0.950525	7.102e-10
53	1.49e-09	1.64e-09	2.83e-09	1.65e-09	5.9e-10	9.61e-10	9.78e-10	2.49e-10	2e-10	3.66e-10	2.19e-10	2.74e-10	1.86e-10	5.22e-10	2.55e-10	5.12e-10	7.02e-10	1.06e-10	5.89e-10	2.7e-10	5.41e-10	1.27e-09	8.1e-10	9.42e-10	8.01e-10	2.07e-09	4.09e-10	2.97e-10	1.55e-09	6.33e-10	6.56e-10	8.17e-10	6.73e-10	1.64e-10	4.14e-10	6.37e-10	2.04e-10	5.12e-10	6.76e-10	2.85e-10	8.07e-11	5.89e-10	9.21e-10	5.41e-10	5.27e-10		No	0.842239	7.205e-10
54	1.42e-09	1.58e-09	2.85e-09	1.61e-09	5.57e-10	8.75e-10	9.49e-10	2.48e-10	2.07e-10	3.3e-10	2.21e-10	2.75e-10	1.86e-10	5.3e-10	2.83e-10	5.21e-10	6.81e-10	1.33e-10	6.09e-10	2.48e-10	5.47e-10	1.34e-09	7.83e-10	1e-09	7.79e-10	2.03e-09	4.34e-10	2.72e-10	1.44e-09	6.16e-10	6.49e-10	8.15e-10	6.76e-10	1.73e-10	3.51e-10	6.22e-10	2.25e-10	5.04e-10	6.87e-10	2.62e-10	1.04e-10	6.32e-10	7.63e-10	5.75e-10	5.1e-10		No	0.853387	7.076e-10
55	1.43e-09	1.6e-09	2.87e-09	1.65e-09	5.46e-10	9.23e-10	9.97e-10	2.46e-10	1.73e-10	3.36e-10	2.01e-10	2.83e-10	1.72e-10	5.19e-10	2.37e-10	5.33e-10	6.18e-10	9.27e-11	5.29e-10	2.28e-10	5.53e-10	1.3e-09	7.65e-10	9.67e-10	8.43e-10	2.1e-09	4.13e-10	2.82e-10	1.51e-09	6.57e-10	6.3e-10	8.09e-10	6.95e-10	1.67e-10	4.06e-10	5.43e-10	1.85e-10	4.77e-10	7.5e-10	2.44e-10	8.1e-11	6.11e-10	8.73e-10	5.47e-10	4.62e-10		No	0.898943	7.017e-10
56	1.47e-09	1.56e-09	2.79e-09	1.55e-09	5.45e-10	9.15e-10	9.48e-10	2.4e-10	1.87e-10	3.37e-10	1.85e-10	2.79e-10	1.78e-10	5.25e-10	2.67e-10	5.08e-10	6.84e-10	1.05e-10	6.12e-10	2.32e-10	5.65e-10	1.35e-09	8.1e-10	9.7e-10	7.8e-10	2.08e-09	4.52e-10	2.79e-10	1.46e-09	6.36e-10	6.56e-10	8.4e-10	6.89e-10	1.66e-10	3.88e-10	5.72e-10	1.77e-10	5.23e-10	7.1e-10	2.78e-10	1.05e-10	6.26e-10	7.99e-10	5.71e-10	4.98e-10		No	0.927603	6.991e-10
57	1.41e-09	1.55e-09	2.65e-09	1.62e-09	5.5e-10	9.62e-10	9.79e-10	2.6e-10	1.91e-10	3.16e-10	2.1e-10	2.99e-10	1.79e-10	5.31e-10	2.48e-10	4.99e-10	6.68e-10	9.25e-11	5.79e-10	2.34e-10	5.72e-10	1.29e-09	8.01e-10	9.87e-10	8.05e-10	2e-09	4.24e-10	2.95e-10	1.56e-09	6.38e-10	6.43e-10	7.84e-10	6.71e-10	1.62e-10	3.72e-10	5.37e-10	1.66e-10	4.18e-10	5.92e-10	2.72e-10	8.94e-11	5.98e-10	7.9e-10	5.18e-10	4.69e-10		No	0.838027	6.952e-10
58	1.45e-09	1.59e-09	2.8e-09	1.57e-09	5.76e-10	9.14e-10	9.73e-10	2.56e-10	2.01e-10	3.39e-10	1.85e-10	2.75e-10	1.93e-10	4.81e-10	2.6e-10	4.83e-10	5.91e-10	9.44e-11	5.34e-10	2.33e-10	5.28e-10	1.27e-09	8.3e-10	1.01e-09	8.29e-10	2.02e-09	4.18e-10	2.62e-10	1.45e-09	6.4e-10	6.69e-10	8.17e-10	6.79e-10	1.61e-10	3.18e-10	5.47e-10	1.85e-10	5.13e-10	6.15e-10	2.62e-10	7.77e-11	5.99e-10	8.01e-10	5.29e-10	4.48e-10		No	0.8712	6.917e-10
59	1.46e-09	1.58e-09	2.72e-09	1.51e-09	5.66e-10	9.45e-10	9.94e-10	2.39e-10	1.72e-10	3.32e-10	1.92e-10	2.7e-10	1.83e-10	5e-10	2.54e-10	4.77e-10	6e-10	1.07e-10	5.32e-10	2.36e-10	5.77e-10	1.29e-09	8e-10	9.48e-10	7.63e-10	2.15e-09	4.25e-10	2.67e-10	1.42e-09	6.31e-10	6.89e-10	7.98e-10	6.79e-10	1.7e-10	3.18e-10	5.12e-10	1.8e-10	5.14e-10	6.64e-10	2.51e-10	8.73e-11	5.44e-10	8.12e-10	4.7e-10	4.28e-10		No	0.861548	6.879e-10
60	1.42e-09	1.55e-09	2.71e-09	1.49e-09	5.44e-10	9.31e-10	9.82e-10	2.47e-10	1.85e-10	3.23e-10	1.97e-10	3.04e-10	1.78e-10	4.95e-10	2.51e-10	4.34e-10	5.69e-10	1.02e-10	5.2e-10	2.38e-10	4.83e-10	1.26e-09	8.19e-10	9.46e-10	7.82e-10	2.01e-09	3.74e-10	2.7e-10	1.46e-09	6.34e-10	6.43e-10	8.34e-10	6.57e-10	1.59e-10	3.18e-10	4.96e-10	1.89e-10	4.54e-10	6.6e-10	2.03e-10	9.8e-11	5.69e-10	7.23e-10	5.41e-10	4.3e-10		No	0.869632	6.74e-10
61	1.4e-09	1.6e-09	2.85e-09	1.57e-09	5.79e-10	9.9e-10	9.61e-10	2.56e-10	1.87e-10	3.23e-10	2.2e-10	2.72e-10	1.75e-10	4.84e-10	2.62e-10	4.59e-10	5.76e-10	9.32e-11	4.4e-10	2.28e-10	4.86e-10	1.3e-09	7.92e-10	9.49e-10	8.07e-10	2.08e-09	3.88e-10	2.59e-10	1.44e-09	6.15e-10	6.35e-10	7.94e-10	6.43e-10	1.53e-10	3.2e-10	5.42e-10	1.63e-10	4.6e-10	6.32e-10	2.45e-10	8.23e-11	5.22e-10	7.94e-10	5.2e-10	4.24e-10		No	0.824029	6.862e-10
62	1.43e-09	1.53e-09	2.69e-09	1.58e-09	5.74e-10	8.8e-10	9.93e-10	2.25e-10	1.9e-10	3.42e-10	1.9e-10	2.86e-10	1.61e-10	4.17e-10	2.5e-10	4.38e-10	6.08e-10	7.39e-11	4.77e-10	2.53e-10	4.81e-10	1.24e-09	7.97e-10	9.12e-10	7.58e-10	2.09e-09	4.12e-10	2.7e-10	1.53e-09	6.33e-10	6.18e-10	8.01e-10	6.91e-10	1.58e-10	3.03e-10	4.76e-10	1.88e-10	4.11e-10	6.13e-10	2.29e-10	8.48e-11	6.38e-10	7.74e-10	4.83e-10	4.05e-10		No	0.88799	6.699e-10
63	1.45e-09	1.54e-09	2.81e-09	1.5e-09	5.42e-10	8.75e-10	9.67e-10	2.53e-10	1.76e-10	3.19e-10	2.01e-10	2.83e-10	1.76e-10	4.55e-10	2.63e-10	4.14e-10	6.44e-10	9e-11	4.76e-10	2.17e-10	5.02e-10	1.24e-09	7.81e-10	9.36e-10	7.4e-10	2.02e-09	3.94e-10	2.75e-10	1.48e-09	6.63e-10	6.26e-10	7.83e-10	6.58e-10	1.53e-10	3.31e-10	4.85e-10	1.55e-10	4.33e-10	6.6e-10	2.24e-10	7.22e-11	5.23e-10	7.99e-10	5.12e-10	4.05e-10		No	0.837168	6.74e-10
64	1.42e-09	1.56e-09	2.85e-09	1.57e-09	5.39e-10	8.69e-10	9.42e-10	2.48e-10	1.76e-10	3.35e-10	2.04e-10	2.81e-10	1.93e-10	4.26e-10	2.18e-10	4.35e-10	5.86e-10	8.55e-11	5.21e-10	1.77e-10	4.95e-10	1.23e-09	7.46e-10	9.58e-10	7.8e-10	2.1e-09	3.99e-10	2.76e-10	1.47e-09	6.49e-10	6.47e-10	8.22e-10	7.05e-10	1.57e-10	3.23e-10	4.78e-10	1.88e-10	4.34e-10	6.25e-10	2.54e-10	7.58e-11	5.56e-10	7.05e-10	4.89e-10	4.2e-10		No	0.871378	6.729e-10
65	1.43e-09	1.55e-09	2.76e-09	1.59e-09	5.32e-10	8.64e-10	9.69e-10	2.41e-10	1.87e-10	3.35e-10	1.98e-10	2.68e-10	1.57e-10	4.63e-10	2.54e-10	4.31e-10	5.81e-10	1.07e-10	4.99e-10	2.17e-10	5.12e-10	1.22e-09	7.75e-10	9.19e-10	8.07e-10	2.02e-09	3.91e-10	2.69e-10	1.55e-09	6.01e-10	6.35e-10	8.36e-10	7.02e-10	1.65e-10	2.73e-10	4.71e-10	1.76e-10	4.59e-10	5.86e-10	2.26e-10	8e-11	4.52e-10	7.02e-10	4.94e-10	4.3e-10		No	0.818114	6.736e-10
66	1.39e-09	1.53e-09	2.76e-09	1.48e-09	5.28e-10	8.56e-10	9.15e-10	2.34e-10	1.69e-10	3.43e-10	1.96e-10	2.92e-10	1.57e-10	4.33e-10	2.1e-10	4.38e-10	6.09e-10	9.48e-11	4.24e-10	1.87e-10	4.76e-10	1.26e-09	7.34e-10	9.08e-10	7.68e-10	2.13e-09	4.21e-10	2.54e-10	1.43e-09	5.91e-10	6.75e-10	7.94e-10	7.22e-10	1.63e-10	2.98e-10	4.49e-10	1.6e-10	4.81e-10	6.01e-10	2.4e-10	8.2e-11	4.76e-10	6.99e-10	4.66e-10	4e-10		No	0.904901	6.534e-10
67	1.4e-09	1.54e-09	2.63e-09	1.53e-09	5.31e-10	9.31e-10	9.88e-10	2.26e-10	1.74e-10	3.11e-10	2.08e-10	2.81e-10	1.61e-10	4.4e-10	2.74e-10	4.05e-10	5.64e-10	8.38e-11	3.97e-10	1.93e-10	4.7e-10	1.2e-09	7.66e-10	9.06e-10	7.32e-10	2.01e-09	3.72e-10	2.6e-10	1.41e-09	6.27e-10	6.43e-10	7.59e-10	6.63e-10	1.5e-10	3.04e-10	4.38e-10	1.63e-10	4.72e-10	6.28e-10	1.96e-10	7.38e-11	5.08e-10	7.08e-10	5.08e-10	3.85e-10		No	0.833989	6.542e-10
68	1.36e-09	1.57e-09	2.6e-09	1.48e-09	5.87e-10	8.86e-10	9.62e-10	2.44e-10	2.04e-10	3.15e-10	1.83e-10	2.73e-10	1.69e-10	4.18e-10	2.77e-10	4.21e-10	5.37e-10	8.29e-11	4.83e-10	2.31e-10	4.72e-10	1.25e-09	7.5e-10	9e-10	7.87e-10	2.02e-09	3.84e-10	2.71e-10	1.39e-09	6.22e-10	6.54e-10	7.83e-10	6.77e-10	1.53e-10	2.62e-10	4.52e-10	1.56e-10	4.06e-10	5.56e-10	2.02e-10	8.62e-11	4.07e-10	7.71e-10	4.57e-10	3.71e-10		No	0.805926	6.55e-10
69	1.42e-09	1.5e-09	2.75e-09	1.56e-09	5.5e-10	8.73e-10	9.39e-10	2.41e-10	1.87e-10	3.21e-10	1.86e-10	2.63e-10	1.62e-10	4.23e-10	2.42e-10	3.9e-10	5.29e-10	6.98e-11	4.64e-10	1.85e-10	4.34e-10	1.21e-09	7.72e-10	9.02e-10	7.84e-10	1.98e-09	3.75e-10	2.48e-10	1.45e-09	6.17e-10	6.3e-10	7.56e-10	6.8e-10	1.57e-10	3.32e-10	4.16e-10	1.7e-10	3.96e-10	5.57e-10	1.85e-10	6.14e-11	5.23e-10	6.86e-10	5.1e-10	3.89e-10		No	0.829664	6.518e-10
70	1.43e-09	1.48e-09	2.78e-09	1.56e-09	5.59e-10	8.61e-10	9.22e-10	2.37e-10	1.73e-10	3.1e-10	1.93e-10	2.52e-10	1.58e-10	4.06e-10	2.59e-10	3.84e-10	5.68e-10	7.5e-11	4.14e-10	1.92e-10	4.82e-10	1.25e-09	7.52e-10	9.2e-10	7.95e-10	1.97e-09	3.96e-10	2.57e-10	1.42e-09	6.27e-10	6.3e-10	7.51e-10	6.46e-10	1.61e-10	3.07e-10	3.83e-10	1.76e-10	3.82e-10	5.84e-10	1.83e-10	7.6e-11	4.53e-10	7.24e-10	4.99e-10	3.74e-10		No	0.815291	6.521e-10
71	1.39e-09	1.5e-09	2.72e-09	1.51e-09	5.38e-10	8.58e-10	9.43e-10	2.3e-10	1.72e-10	3.39e-10	1.83e-10	2.74e-10	1.7e-10	3.9e-10	2.61e-10	4.38e-10	5.87e-10	7.7e-11	3.95e-10	2.09e-10	4.72e-10	1.23e-09	7.85e-10	9.19e-10	7.46e-10	1.97e-09	3.67e-10	2.69e-10	1.43e-09	6.08e-10	6.44e-10	8.09e-10	6.59e-10	1.61e-10	2.61e-10	3.75e-10	1.95e-10	4.74e-10	5.77e-10	1.76e-10	5.75e-11	4.78e-10	6.13e-10	4.54e-10	3.5e-10		No	0.800062	6.503e-10
72	1.38e-09	1.55e-09	2.66e-09	1.51e-09	4.9e-10	8.67e-10	9.25e-10	2.44e-10	1.79e-10	3.11e-10	2.1e-10	2.61e-10	1.7e-10	3.82e-10	2.25e-10	3.77e-10	5.78e-10	9.15e-11	3.75e-10	1.61e-10	4.52e-10	1.22e-09	7.7e-10	9.2e-10	7.69e-10	2.01e-09	4.03e-10	2.73e-10	1.39e-09	6.17e-10	6.3e-10	7.75e-10	6.55e-10	1.65e-10	2.68e-10	3.85e-10	1.44e-10	3.74e-10	5.16e-10	1.59e-10	7.52e-11	5.3e-10	6.62e-10	4.04e-10	3.77e-10		No	0.835085	6.38e-10
73	1.42e-09	1.5e-09	2.66e-09	1.48e-09	5.28e-10	8.12e-10	9.44e-10	2.18e-10	1.61e-10	3.04e-10	1.96e-10	2.53e-10	1.44e-10	4.23e-10	2.11e-10	3.81e-10	4.87e-10	7.65e-11	4.15e-10	1.83e-10	4.58e-10	1.22e-09	7.88e-10	9.22e-10	7.39e-10	2.01e-09	3.52e-10	2.79e-10	1.44e-09	5.99e-10	6.27e-10	7.78e-10	6.81e-10	1.45e-10	2.72e-10	3.77e-10	1.7e-10	3.89e-10	5.75e-10	1.94e-10	6.43e-11	4.52e-10	6.04e-10	4.73e-10	3.71e-10		No	0.873925	6.312e-10
74	1.37e-09	1.52e-09	2.57e-09	1.41e-09	5.78e-10	8.31e-10	9.17e-10	2.46e-10	1.67e-10	2.98e-10	1.89e-10	2.57e-10	1.65e-10	3.81e-10	1.93e-10	4.05e-10	5.55e-10	6.5e-11	4.33e-10	1.51e-10	4.65e-10	1.23e-09	7.23e-10	9.05e-10	7.38e-10	1.95e-09	3.64e-10	2.58e-10	1.45e-09	5.88e-10	6.27e-10	7.48e-10	6.62e-10	1.56e-10	2.57e-10	4.39e-10	1.42e-10	3.95e-10	5.33e-10	1.55e-10	7.77e-11	4.63e-10	5.61e-10	4.48e-10	3.1e-10		No	0.821808	6.27e-10
75	1.36e-09	1.53e-09	2.7e-09	1.5e-09	5.41e-10	8.25e-10	9.11e-10	2.5e-10	1.66e-10	2.8e-10	1.66e-10	2.65e-10	1.66e-10	4.18e-10	1.96e-10	3.55e-10	5.84e-10	6.82e-11	4.01e-10	1.84e-10	4.64e-10	1.2e-09	6.66e-10	9.1e-10	7.19e-10	1.86e-09	3.97e-10	2.63e-10	1.33e-09	5.9e-10	6.11e-10	7.55e-10	6.94e-10	1.61e-10	2.28e-10	3.72e-10	1.61e-10	3.97e-10	5.25e-10	1.74e-10	5.74e-11	3.9e-10	6.68e-10	4.27e-10	3.3e-10		No	0.728673	6.348e-10
76	1.37e-09	1.5e-09	2.71e-09	1.56e-09	5.4e-10	7.8e-10	9.17e-10	2.37e-10	1.71e-10	3.22e-10	1.99e-10	2.69e-10	1.46e-10	3.47e-10	1.9e-10	3.45e-10	5.24e-10	7.11e-11	4.18e-10	1.68e-10	4.84e-10	1.2e-09	7.05e-10	8.93e-10	7.7e-10	1.95e-09	3.66e-10	2.45e-10	1.4e-09	5.86e-10	6.29e-10	7.64e-10	6.61e-10	1.48e-10	2.66e-10	3.42e-10	1.58e-10	3.83e-10	5.73e-10	1.56e-10	6.25e-11	4e-10	5.87e-10	4.27e-10	3.34e-10		No	0.770272	6.318e-10
77	1.35e-09	1.46e-09	2.61e-09	1.49e-09	5.45e-10	7.91e-10	9e-10	2.2e-10	1.64e-10	2.98e-10	1.8e-10	2.72e-10	1.5e-10	4.01e-10	2.04e-10	3.04e-10	5.7e-10	7.38e-11	4.08e-10	1.79e-10	4.62e-10	1.15e-09	7.09e-10	8.83e-10	7.18e-10	2.01e-09	3.75e-10	2.52e-10	1.41e-09	6.07e-10	6.19e-10	7.61e-10	6.73e-10	1.44e-10	2.47e-10	3.39e-10	1.64e-10	3.76e-10	5.8e-10	1.64e-10	7.77e-11	4.01e-10	6.8e-10	4.36e-10	3.24e-10		No	0.838103	6.206e-10
78	1.35e-09	1.52e-09	2.62e-09	1.55e-09	5.2e-10	8.31e-10	8.8e-10	2.25e-10	1.86e-10	2.97e-10	1.75e-10	2.53e-10	1.54e-10	3.6e-10	2.36e-10	3.24e-10	4.71e-10	5.96e-11	4.25e-10	1.44e-10	4.55e-10	1.18e-09	7.43e-10	9.05e-10	7.63e-10	1.82e-09	3.89e-10	2.64e-10	1.41e-09	6.15e-10	6.36e-10	7.77e-10	6.67e-10	1.5e-10	2.48e-10	3.38e-10	1.47e-10	4.63e-10	5.86e-10	1.83e-10	5.58e-11	3.43e-10	6.7e-10	4.27e-10	2.94e-10		No	0.831271	6.207e-10
79	1.34e-09	1.44e-09	2.65e-09	1.5e-09	5.29e-10	8.81e-10	9.02e-10	2.27e-10	1.73e-10	3.23e-10	2.11e-10	2.24e-10	1.51e-10	3.65e-10	2.08e-10	3.49e-10	4.95e-10	6.02e-11	4.13e-10	1.81e-10	4.31e-10	1.18e-09	7.3e-10	8.8e-10	7.78e-10	1.94e-09	3.77e-10	2.5e-10	1.33e-09	5.75e-10	6.29e-10	7.63e-10	7.03e-10	1.59e-10	2e-10	3.73e-10	1.5e-10	3.23e-10	5.19e-10	1.49e-10	7.64e-11	3.4e-10	6.32e-10	4.09e-10	3.11e-10		No	0.769069	6.216e-10
80	1.35e-09	1.48e-09	2.58e-09	1.44e-09	5.13e-10	9.17e-10	9.07e-10	2.49e-10	1.59e-10	3.15e-10	1.84e-10	2.2e-10	1.4e-10	3.66e-10	2.07e-10	3.08e-10	5.08e-10	1.08e-10	3.64e-10	1.26e-10	4.55e-10	1.16e-09	7.13e-10	8.83e-10	7.44e-10	1.92e-09	3.74e-10	2.63e-10	1.33e-09	5.94e-10	6.04e-10	7.69e-10	6.1e-10	1.51e-10	2.46e-10	3.32e-10	1.59e-10	4.29e-10	4.92e-10	1.37e-10	7.43e-11	4.24e-10	5.32e-10	4.21e-10	3.5e-10		No	0.788194	6.141e-10
[truncated: 6 more columns]

## Sheet: Figure 4L
Figure 4L - % recovery after light stimulation at increasing time intervals from the end of the light train
																																									Multiple t-test per row
Time (s)	Miro1(+/+)																					Miro1(Δ/Δ)																			Discovery?	P value	Mean of Miro(+/+)	Mean of Miro1(Δ/Δ)	Difference	SE of difference	t ratio	df	q value
0.5	0.856866	0.694658	0.645309	0.680079	0.737651	0.467951	0.410975	0.678448	0.519097	0.462731	0.554445	0.362919	0.392386	0.392719	0.367488	0.525305	0.706927	0.363183	0.461361	0.229363	0.35179	0.424048	0.450566	0.814698	0.547509	0.659505	0.552953	0.410748	0.205202	0.325514	0.348989	0.195812	0.660549	0.264429	0.164785	0.16669	0.264585	0.421661	0.316253		No	0.043217	0.5172	0.3997	0.1175	0.05614	2.093	37	0.210161
1	0.950701	0.804641	0.709394	0.884029	0.541075	0.539807	0.470542	0.660011	1.02249	0.578092	0.567101	0.582898	0.472914	0.463719	0.464675	0.68132	0.733503	0.58247	0.55964	0.332606	0.464831	0.761812	0.807169	0.950028	0.566651	0.7339	0.44124	0.791646	0.432741	0.554444	0.689258	0.470041	0.596926	0.482111	0.367728	0.289466	0.421472	0.567224	0.467107		No	0.433958	0.6222	0.5773	0.04494	0.05681	0.791	37	0.580423
1.5	1.08511	0.778387	0.738806	1.27634	0.932397	0.520764	0.543155	0.901567	2.14053	0.778557	0.670649	0.843904	0.673458	0.744063	0.6839	0.688297	0.730249	0.726327	0.780201	0.600044	0.593459	0.758672	0.853431	1.32426	0.599202	0.657757	0.715745	1.13721	0.630994	0.674139	0.686031	0.563051	0.769296	0.562832	0.377587	0.521957	0.653114	0.624439	0.530134		No	0.18832	0.83	0.7022	0.1278	0.09535	1.34	37	0.369908
2	1.32427	0.852151	0.914203	1.86792	1.04324	0.548078	0.572856	1.12285	1.49822	0.762121	0.674739	0.855248	0.967376	0.888974	0.788639	0.76054	0.874754	0.799197	0.711695	0.762777	0.713425	1.09645	0.904543	1.11571	0.661319	0.762929	0.728763	0.885208	0.629917	0.788579	0.708373	0.625379	0.767655	0.649574	0.555016	0.553202	0.737546	0.633551	0.710481		No	0.047429	0.9192	0.7508	0.1684	0.08213	2.051	37	0.210161
2.5	1.30245	1.01707	0.901789	1.398	0.933481	0.631685	0.597668	1.5041	2.81842	0.808396	0.678753	0.794705	1.033	0.793763	0.812396	0.865368	0.819015	0.832519	0.948476	0.890662	0.83153	1.20046	1.02883	1.9801	0.785478	0.701178	0.633016	1.02966	0.837936	0.768629	0.720142	0.688202	0.724389	0.663927	0.67027	0.600585	0.799866	0.760252	0.610973		No	0.219747	1.01	0.8447	0.1655	0.1326	1.248	37	0.369908
3	1.54389	0.923944	0.923708	1.81377	0.889818	0.660381	0.576538	1.10235	2.2173	0.875826	0.546838	0.784294	1.09501	0.876394	0.630881	0.881924	0.926041	0.887315	0.769408	0.816071	0.86687	1.22646	1.08298	1.76042	0.833002	0.816322	0.7957	1.0648	0.898785	0.87977	0.953876	0.721374	0.820027	0.714367	0.709639	0.753481	0.766561	0.785238	0.807934		No	0.528122	0.9814	0.9106	0.07076	0.1111	0.6369	37	0.580423
3.5	1.40078	0.891984	0.964485	1.45684	0.933136	0.66009	0.62977	1.39201	2.47918	0.932258	0.825588	0.944133	1.161	0.710292	1.05489	0.940169	0.995917	0.877917	1.04744	0.946071	0.907544	1.35219	1.10646	1.26519	0.843973	0.78779	1.0584	1.08276	0.635578	0.933798	1.01673	0.738279	0.895915	0.8498	0.67122	0.750113	0.973679	0.834571	0.747344		No	0.193703	1.055	0.9191	0.1357	0.1025	1.324	37	0.369908
4	1.37029	1.06804	1.02674	1.74379	1.07991	0.653597	0.645112	1.23274	2.34169	1.03646	0.604857	1.13141	1.32631	1.07651	0.653695	0.888602	0.868222	0.938246	0.785416	0.846404	0.814362	1.44814	1.09719	1.39315	0.86212	0.816202	0.791441	1.77035	0.65742	0.812276	1.12652	0.889965	0.964054	0.970085	0.735131	0.856493	0.879585	0.893479	0.845012		No	0.574677	1.054	0.9894	0.06456	0.114	0.5662	37	0.580423
4.5	1.68107	1.02767	1.16251	2.48399	0.874678	0.690608	0.622214	1.28871	3.57209	0.978133	1.11254	1.09261	1.11892	1.03285	1.24861	0.959678	1.21263	0.940487	1.00372	0.850471	1.14705	1.14257	1.13884	1.21951	0.817129	0.790897	0.945604	0.996028	0.832249	0.986129	1.08453	0.917023	0.823859	0.922926	0.728879	0.890983	0.887699	0.977942	0.817059		No	0.062424	1.243	0.94	0.3029	0.1577	1.921	37	0.210161
5	1.43238	0.959183	0.948022	1.94652	1.06576	0.639892	0.645327	0.998626	2.54385	0.956093	0.978393	0.902729	1.24008	0.823875	1.30575	0.891509	1.03165	0.918037	0.865196	0.975544	0.903561	1.91491	1.21413	1.61644	0.90183	0.850221	1.08614	1.06004	0.954504	0.951543	0.862293	0.897281	0.886901	1.04476	0.798516	0.79216	0.872779	0.87199	0.838255		No	0.562549	1.094	1.023	0.07087	0.1213	0.5843	37	0.580423
