# Supplementary material for: Miro1-dependent mitochondrial dynamics in parvalbumin interneurons
Source: eLife. 2021 Jun 30;10:e65215. doi: 10.7554/eLife.65215 (PMC8294849; doi:10.7554/eLife.65215)
Supplement: Figure 5—figure supplement 1—source data 1. [file elife-65215-fig5-figsupp1-data1.xlsx]

## Sheet: Fig5 FigSup1A
Figure 5 - Figure Supplement 1A - Bassoon, Homer and colocalized stained area in the somatic and dendritic layers of the hippocampus (μm^2)
Bassoon - Stratum Pyramidale				Homer - Stratum Pyramidale				Bassoon-Homer Coloc. - Stratum Pyramidale				Bassoon - Stratum Oriens/Radiatum				Homer - Stratum Oriens/Radiatum				Bassoon-Homer Coloc. - Stratum Oriens/Radiatum
WT	KO			WT	KO			WT	KO			WT	KO			WT	KO			WT	KO
Miro1(+/+)	Miro1(Δ/Δ)			Miro1(+/+)	Miro1(Δ/Δ)			Miro1(+/+)	Miro1(Δ/Δ)			Miro1(+/+)	Miro1(Δ/Δ)			Miro1(+/+)	Miro1(Δ/Δ)			Miro1(+/+)	Miro1(Δ/Δ)
142.156	133.381			102.317	91.5117			70.0967	61.565			229.842	206.309			152.928	127.251			72.1933	57.1947
126.347	128.882			104.208	121.348			78.789	70.8602			233.864	232.622			169.369	138.807			73.3349	64.8631
169.277	159.018			160.157	148.944			115.452	97.8622			237.131	196.423			167.303	118.26			72.1374	52.3428
136.369	135.169			112.242	103.79			87.619	69.825			224.03	209.842			169.15	138.686			73.549	62.037
117.671	139.86			95.633	107.915			56.8033	68.1271			216.14	199.644			186.095	131.075			67.9575	62.5769
106.833	153.675			125.557	127.837			71.3668	97.3753			238.201	256.956			181.401	267.622			81.0542	100.246
148.164	143.932			119.812	94.7277			84.7759	72.7517			245.419	254.952			172.487	184.612			81.1053	80.3187
169.328	135.84			158.703	86.3054			120.955	52.1289			226.303	246.432			185.358	153.963			75.825	77.3887
91.9041	129.12			68.7501	99.5932			35.3019	62.3059			244.592	228.962			179.256	161.67			83.391	77.5767
129.805	123.975			152.006	87.658			103.492	46.7578			253.82	193.32			198.147	167.597			91.2	70.7633
113.978	116.573			61.9743	100.374			32.5865	62.1863			234.133	278.337			183.629	271.805			77.0178	100.361
109.105	112.491			66.0708	89.8657			36.7756	43.6886			284.086	285.665			281.25	287.75			96.066	96.69
108.629	128.569			57.4612	148.314			35.1874	89.8518			295.974	291.502			278.345	293.186			99.165	99.0553
101.52	55.2437			88.143	92.7769			73.1842	40.0501			292.829	268.452			263.548	266.885			109.638	102.678
108.732	70.081			83.4727	50.1493			81.579	36.88			288.75	296.425			279.433	299.25			109.074	102.424
103.822	50.0528			87.8889	70.8562			59.169	34.5828			304.048	278.661			320.38	267.317			110.2	95.325
78.0549	80.2773			51.4267	80.91			44.1773	55.0833			298.993	282.326			299.345	306.048			108.158	110.803
37.4436	98.1982			32.6671	105.764			29.1822	29.9359			285.486	294.421			290.718	302.596			102.226	122.617
80.1093	66.4551			75.1467	69.8642			60.4336	51.3333			273.429	263.666			252.444	289.354			99.267	83.2703
54.9106	42.2182			54.359	109.74			22.6604	20.4286			271.377	258			267.636	276.266			78.7125	74.4345
66.4907	36.5754			117.218	55.72			35.712	19.0468			279.505	253.565			249.927	252.767			89.019	70.7625
59.1667	51.9723			95.5609	68.742			38.517	22.4006			265.401	255.324			267.272	260.998			81.525	71.121
108.146	34.0613			115.826	163.683			91.2902	22.5643			262.81	254.007			280.334	265.625			87.375	79.5025
												250.054	252.315			258.03	244.602			74.2542	80.3137
												268.77	285.977			295.038	295.191			99.9305	93.2973
	Miro1(+/+)	Miro1(Δ/Δ)			Miro1(+/+)	Miro1(Δ/Δ)			Miro1(+/+)	Miro1(Δ/Δ)		280.896	284.627			276.858	308.188			102.018	97.929
Test for normal distribution				Test for normal distribution				Test for normal distribution				267.03	242.938			257.754	280.44			95.8125	80.773
Anderson-Darling test				Anderson-Darling test				Anderson-Darling test				254.644	286.362			247.924	317.952			100.822	101.814
A2*	0.2682	0.9932		A2*	0.227	0.3778		A2*	0.482	0.2711		242.928	259.949			303.485	260.067			78.076	97.1515
P value	0.6507	0.0104		P value	0.791	0.379		P value	0.209	0.641		251.333	252.674			242.079	287.405			91.575	85.918
Passed normality test (alpha=0.05)?	Yes	No		Passed normality test (alpha=0.05)?	Yes	Yes		Passed normality test (alpha=0.05)?	Yes	Yes		256.796	262.623			303.212	278.531			83.1375	96.6997
P value summary	ns	*		P value summary	ns	ns		P value summary	ns	ns		213.73	247.817			267.57	292.019			64.08	73.216
												241.673	234.438			271.451	273.231			77.3033	66.674
D'Agostino & Pearson test				D'Agostino & Pearson test				D'Agostino & Pearson test				280.098	243.852			328.539	282.641			96.965	79.4638
K2	0.04943	8.019		K2	0.5898	1.626		K2	1.806	0.9116		281.765	235.704			315.347	283.746			101.64	71.148
P value	0.9756	0.0181		P value	0.7446	0.4436		P value	0.4053	0.6339		277.466	241.675			276.279	260.202			93.849	77.181
Passed normality test (alpha=0.05)?	Yes	No		Passed normality test (alpha=0.05)?	Yes	Yes		Passed normality test (alpha=0.05)?	Yes	Yes		257.935				259.649				108.313
P value summary	ns	*		P value summary	ns	ns		P value summary	ns	ns
Shapiro-Wilk test				Shapiro-Wilk test				Shapiro-Wilk test					Miro1(+/+)	Miro1(Δ/Δ)			Miro1(+/+)	Miro1(Δ/Δ)			Miro1(+/+)	Miro1(Δ/Δ)
W	0.9741	0.8935		W	0.9685	0.9595		W	0.94	0.9531		Test for normal distribution				Test for normal distribution				Test for normal distribution
P value	0.7863	0.0186		P value	0.6538	0.4541		P value	0.1793	0.3382		Anderson-Darling test				Anderson-Darling test				Anderson-Darling test
Passed normality test (alpha=0.05)?	Yes	No		Passed normality test (alpha=0.05)?	Yes	Yes		Passed normality test (alpha=0.05)?	Yes	Yes		A2*	0.2696	0.5646		A2*	1.577	3.167		A2*	0.6716	0.5375
P value summary	ns	*		P value summary	ns	ns		P value summary	ns	ns		P value	0.6593	0.1336		P value	0.0004	<0.0001		P value	0.0731	0.157
												Passed normality test (alpha=0.05)?	Yes	Yes		Passed normality test (alpha=0.05)?	No	No		Passed normality test (alpha=0.05)?	Yes	Yes
Kolmogorov-Smirnov test				Kolmogorov-Smirnov test				Kolmogorov-Smirnov test				P value summary	ns	ns		P value summary	***	****		P value summary	ns	ns
KS distance	0.1288	0.1873		KS distance	0.08	0.1372		KS distance	0.1577	0.07753
P value	>0.1000	0.0354		P value	>0.1000	>0.1000		P value	>0.1000	>0.1000		D'Agostino & Pearson test				D'Agostino & Pearson test				D'Agostino & Pearson test
Passed normality test (alpha=0.05)?	Yes	No		Passed normality test (alpha=0.05)?	Yes	Yes		Passed normality test (alpha=0.05)?	Yes	Yes		K2	3.273	1.778		K2	6.436	6.739		K2	8.39	0.6946
P value summary	ns	*		P value summary	ns	ns		P value summary	ns	ns		P value	0.1947	0.411		P value	0.04	0.0344		P value	0.0151	0.7066
												Passed normality test (alpha=0.05)?	Yes	Yes		Passed normality test (alpha=0.05)?	No	No		Passed normality test (alpha=0.05)?	No	Yes
Number of values	23	23		Number of values	23	23		Number of values	23	23		P value summary	ns	ns		P value summary	*	*		P value summary	*	ns
												Shapiro-Wilk test				Shapiro-Wilk test				Shapiro-Wilk test
	Miro1(+/+)	Miro1(Δ/Δ)			Miro1(+/+)	Miro1(Δ/Δ)			Miro1(+/+)	Miro1(Δ/Δ)		W	0.9747	0.9462		W	0.9007	0.7995		W	0.9465	0.9695
Number of values	23	23		Number of values	23	23		Number of values	23	23		P value	0.5506	0.0795		P value	0.0031	<0.0001		P value	0.0743	0.4108
												Passed normality test (alpha=0.05)?	Yes	Yes		Passed normality test (alpha=0.05)?	No	No		Passed normality test (alpha=0.05)?	Yes	Yes
Minimum	37.44	34.06		Minimum	32.67	50.15		Minimum	22.66	19.05		P value summary	ns	ns		P value summary	**	****		P value summary	ns	ns
Maximum	169.3	159		Maximum	160.2	163.7		Maximum	121	97.86
Range	131.9	125		Range	127.5	113.5		Range	98.29	78.82		Kolmogorov-Smirnov test				Kolmogorov-Smirnov test				Kolmogorov-Smirnov test
												KS distance	0.09017	0.09795		KS distance	0.1745	0.2782		KS distance	0.1175	0.1286
Mean	107.3	101.1		Mean	95.07	98.97		Mean	63.7	53.37		P value	>0.1000	>0.1000		P value	0.006	<0.0001		P value	>0.1000	>0.1000
Std. Deviation	34.33	41.52		Std. Deviation	34.74	28.87		Std. Deviation	28.7	23.66		Passed normality test (alpha=0.05)?	Yes	Yes		Passed normality test (alpha=0.05)?	No	No		Passed normality test (alpha=0.05)?	Yes	Yes
Std. Error of Mean	7.159	8.657		Std. Error of Mean	7.244	6.02		Std. Error of Mean	5.984	4.932		P value summary	ns	ns		P value summary	**	****		P value summary	ns	ns
												Number of values	37	36		Number of values	37	36		Number of values	37	36
Mann Whitney Test				Unpaired t-test				Unpaired t-test
	Table Analyzed	Bassoon SP			Table Analyzed	Homer SP			Table Analyzed	Basson-Homer coloc SP
													Miro1(+/+)	Miro1(Δ/Δ)			Miro1(+/+)	Miro1(Δ/Δ)			Miro1(+/+)	Miro1(Δ/Δ)
	Column B	Miro1(Δ/Δ)			Column B	Miro1(Δ/Δ)			Column B	Miro1(Δ/Δ)		Number of values	37	36		Number of values	37	36		Number of values	37	36
	vs.	vs.			vs.	vs.			vs.	vs.
	Column A	Miro1(+/+)			Column A	Miro1(+/+)			Column A	Miro1(+/+)		Minimum	213.7	193.3		Minimum	152.9	118.3		Minimum	64.08	52.34
												Maximum	304	296.4		Maximum	328.5	318		Maximum	110.2	122.6
	Mann Whitney test				Unpaired t test				Unpaired t test			Range	90.32	103.1		Range	175.6	199.7		Range	46.12	70.27
	P value	0.8618			P value	0.6805			P value	0.1898
	Exact or approximate P value?	Exact			P value summary	ns			P value summary	ns		Mean	259.8	253.2		Mean	248.1	247		Mean	88.84	83.78
	P value summary	ns			Significantly different (P < 0.05)?	No			Significantly different (P < 0.05)?	No		Std. Deviation	24.41	28.15		Std. Deviation	51.17	61.56		Std. Deviation	13.38	16.31
	Significantly different (P < 0.05)?	No			One- or two-tailed P value?	Two-tailed			One- or two-tailed P value?	Two-tailed		Std. Error of Mean	4.013	4.691		Std. Error of Mean	8.413	10.26		Std. Error of Mean	2.2	2.718
	One- or two-tailed P value?	Two-tailed			t, df	t=0.4145, df=44			t, df	t=1.332, df=44
	Sum of ranks in column A,B	549 , 532
	Mann-Whitney U	256			How big is the difference?				How big is the difference?
					Mean of column A	95.07			Mean of column A	63.7		Unpaired t-test				Mann Whitney Test				Unpaired t-test
	Difference between medians				Mean of column B	98.97			Mean of column B	53.37			Table Analyzed	Bassoon SOSR			Table Analyzed	Homer SOSR			Table Analyzed	Bassoon-Homer coloc SOSR
	Median of column A	108.6, n=23			Difference between means (B - A) ± SEM	3.904 ± 9.419			Difference between means (B - A) ± SEM	-10.33 ± 7.755
	Median of column B	116.6, n=23			95% confidence interval	-15.08 to 22.89			95% confidence interval	-25.96 to 5.302			Column B	Miro1(Δ/Δ)			Column B	Miro1(Δ/Δ)			Column B	Miro1(Δ/Δ)
	Difference: Actual	7.944			R squared (eta squared)	0.003889			R squared (eta squared)	0.03874			vs.	vs.			vs.	vs.			vs.	vs.
	Difference: Hodges-Lehmann	-1.486											Column A	Miro1(+/+)			Column A	Miro1(+/+)			Column A	Miro1(+/+)
					F test to compare variances				F test to compare variances
					F, DFn, Dfd	1.448, 22, 22			F, DFn, Dfd	1.472, 22, 22			Unpaired t test				Mann Whitney test				Unpaired t test
					P value	0.392			P value	0.3716			P value	0.2934			P value	0.738			P value	0.1511
					P value summary	ns			P value summary	ns			P value summary	ns			Exact or approximate P value?	Exact			P value summary	ns
					Significantly different (P < 0.05)?	No			Significantly different (P < 0.05)?	No			Significantly different (P < 0.05)?	No			P value summary	ns			Significantly different (P < 0.05)?	No
													One- or two-tailed P value?	Two-tailed			Significantly different (P < 0.05)?	No			One- or two-tailed P value?	Two-tailed
					Data analyzed				Data analyzed				t, df	t=1.058, df=71			One- or two-tailed P value?	Two-tailed			t, df	t=1.451, df=71
					Sample size, column A	23			Sample size, column A	23							Sum of ranks in column A,B	1338 , 1363
					Sample size, column B	23			Sample size, column B	23			How big is the difference?				Mann-Whitney U	635			How big is the difference?
													Mean of column A	259.8							Mean of column A	88.84
													Mean of column B	253.2			Difference between medians				Mean of column B	83.78
													Difference between means (B - A) ± SEM	-6.521 ± 6.161			Median of column A	263.5, n=37			Difference between means (B - A) ± SEM	-5.061 ± 3.487
													95% confidence interval	-18.81 to 5.764			Median of column B	269.7, n=36			95% confidence interval	-12.01 to 1.892
													R squared (eta squared)	0.01553			Difference: Actual	6.166			R squared (eta squared)	0.02881
																	Difference: Hodges-Lehmann	2.584
													F test to compare variances								F test to compare variances
													F, DFn, Dfd	1.330, 35, 36							F, DFn, Dfd	1.485, 35, 36
													P value	0.3988							P value	0.2423
													P value summary	ns							P value summary	ns
													Significantly different (P < 0.05)?	No							Significantly different (P < 0.05)?	No
													Data analyzed								Data analyzed
													Sample size, column A	37							Sample size, column A	37
													Sample size, column B	36							Sample size, column B	36

## Sheet: Fig5 FigSup1B
Figure 5 - Figure Supplement 1B - slope of fEPSP
Stimulus Intensity	Miro1(+/+)							Miro1(Δ/Δ)										25-50 μA
25	-0.006598	0.03961	-0.03109	0.01436	0.1087	0.001788	0.02131	0.01439	0.07319	0.02501	-0.009361	-0.03155	0.05152	0.01888		WT	Miro1(+/+)	-0.006598	0.03961	-0.03109	0.01436	0.1087	0.001788	0.02131	0.01729	0.05631	0.04412	0.04576	0.01509	0.001604	0.008698	0.03988	0.01124	0.009121	0.01936	0.08702	0.003007	0.01693	0.05882	0.01126	0.02561	0.01692	0.03319	0.0181	0.007044	0.01784	0.02884	0.03158	0.03009
30	0.01729	0.05631	0.04412	0.04576	0.01509	0.001604	0.008698	0.00469	0.01494	0.05758	0.01624	0.02961	0.028	0.0221		KO	Miro1(Δ/Δ)	0.01439	0.07319	0.02501	-0.009361	-0.03155	0.05152	0.01888	0.00469	0.01494	0.05758	0.01624	0.02961	0.028	0.0221	0.02028	0.06501	0.04167	0.00716	0.02623	0.03347	0.03314	0.08274	0.1372	0.02121	0.03031	0.01601	0.01117	0.03242	0.177	0.2376	0.01736	0.03921
35	0.03988	0.01124	0.009121	0.01936	0.08702	0.003007	0.01693	0.02028	0.06501	0.04167	0.00716	0.02623	0.03347	0.03314
40	0.05882	0.01126	0.02561	0.01692	0.03319	0.0181	0.007044	0.08274	0.1372	0.02121	0.03031	0.01601	0.01117	0.03242
45	0.01784	0.02884	0.03158	0.03009	0.1166			0.177	0.2376	0.01736	0.03921	0.00271	0.04341	0.06048
50	0.04162	0.1171	0.07332	0.05439	0.1569	0.03748	0.01043	0.1863	0.3034	0.03334	0.07057	0.03022	0.06037
55	0.1218	0.07607	0.06767	0.005242	0.1834	0.05	0.02546	0.2488	0.4013	0.1811	0.1276		0.0008489	0.06819
60	0.1068	0.08516	0.03241	0.1335	0.2262	0.05083	0.03297	0.2849	0.6691	0.5136	0.1109	0.003276	0.04754	0.07483
65	0.09856	0.1853	0.04894		0.2478	0.06552	0.02558	0.2565	0.5489		0.1404	0.03763	0.04873
70	0.1442	0.1797	0.08086	0.1493	0.2136	0.06384	0.02885	0.2745	0.6828		0.125	0.0777	0.02001	0.04609
75	0.1877	0.2389	0.1297	0.2954		0.06693	0.02716	0.3208	0.5414		0.1805	0.08349	0.06959
	Stimulus Intensity	Discovery?	P value	Mean of Miro1(+/+)	Mean of Miro1(Δ/Δ)	Difference	SE of difference	t ratio	df	q value
	25	No	0.968778	0.02115	0.0203	0.0008573	0.02145	0.03997	12	0.978465							Table Analyzed	fEPSP slope bin stats							Number of families	1
	30	No	0.830299	0.02698	0.02474	0.002245	0.01025	0.219	12	0.908485							Data sets analyzed	A-D							Number of comparisons per family	6
	35	No	0.663765	0.02665	0.03242	-0.005772	0.01295	0.4457	12	0.792293															Alpha	0.05
	40	No	0.244116	0.02442	0.04729	-0.02287	0.01867	1.225	12	0.61858							ANOVA summary
	45	No	0.403366	0.04499	0.08254	-0.03755	0.04303	0.8726	10	0.61858							F	17.58							Tukey's multiple comparisons test	Mean Diff.	95.00% CI of diff.	Significant?	Summary	Adjusted P Value
	50	No	0.359713	0.07018	0.114	-0.04386	0.04588	0.9558	11	0.61858							P value	<0.0001							WT SLOPE 25-45 vs. WT SLOPE 50-75	-0.0763	-0.1421 to -0.01046	Yes	*	0.016	A-B
	55	No	0.131627	0.07566	0.1713	-0.09564	0.05872	1.629	11	0.61858							P value summary	****							WT SLOPE 25-45 vs. KO slope 25-45	-0.0136	-0.08153 to 0.05433	No	ns	0.954	A-C
	60	No	0.167578	0.09541	0.2434	-0.148	0.1008	1.469	12	0.61858							Significant diff. among means (P < 0.05)?	Yes							WT SLOPE 25-45 vs. ko slops 50-75	-0.1684	-0.2364 to -0.1005	Yes	****	<0.0001	A-D
	65	No	0.339218	0.112	0.2064	-0.09448	0.09362	1.009	9	0.61858							R squared	0.2751							WT SLOPE 50-75 vs. KO slope 25-45	0.06271	-0.002094 to 0.1275	No	ns	0.0618	B-C
	70	No	0.424008	0.1229	0.2044	-0.08144	0.09809	0.8303	11	0.61858															WT SLOPE 50-75 vs. ko slops 50-75	-0.09213	-0.1569 to -0.02733	Yes	**	0.0018	B-D
	75	No	0.397739	0.1576	0.2392	-0.08152	0.09182	0.8878	9	0.61858							Brown-Forsythe test								KO slope 25-45 vs. ko slops 50-75	-0.1548	-0.2218 to -0.08791	Yes	****	<0.0001	C-D
																	F (DFn, DFd)	15.94 (3, 139)
																	P value	<0.0001							Test details	Mean 1	Mean 2	Mean Diff.	SE of diff.	n1	n2	q	DF
																	P value summary	****							WT SLOPE 25-45 vs. WT SLOPE 50-75	0.02786	0.1042	-0.0763	0.02532	33	40	4.262	139
																	Are SDs significantly different (P < 0.05)?	Yes							WT SLOPE 25-45 vs. KO slope 25-45	0.02786	0.04146	-0.0136	0.02612	33	35	0.7361	139
																									WT SLOPE 25-45 vs. ko slops 50-75	0.02786	0.1963	-0.1684	0.02612	33	35	9.118	139
																	Bartlett's test								WT SLOPE 50-75 vs. KO slope 25-45	0.1042	0.04146	0.06271	0.02492	40	35	3.559	139
																	Bartlett's statistic (corrected)	118.3							WT SLOPE 50-75 vs. ko slops 50-75	0.1042	0.1963	-0.09213	0.02492	40	35	5.228	139
																	P value	<0.0001							KO slope 25-45 vs. ko slops 50-75	0.04146	0.1963	-0.1548	0.02574	35	35	8.508	139
																	P value summary	****
																	Are SDs significantly different (P < 0.05)?	Yes								WT SLOPE 25-45	WT SLOPE 50-75	KO slope 25-45	ko slops 50-75
																									Number of values	33	40	35	35
																	ANOVA table	SS	DF	MS	F (DFn, DFd)	P value
																	Treatment (between columns)	0.6113	3	0.2038	F (3, 139) = 17.58	P<0.0001			Minimum	-0.03109	0.005242	-0.03155	0.0008489
																	Residual (within columns)	1.611	139	0.01159					Maximum	0.1166	0.2954	0.2376	0.6828
																	Total	2.223	142						Range	0.1477	0.2902	0.2692	0.682
																	Data summary								Mean	0.02786	0.1042	0.04146	0.1963
																	Number of treatments (columns)	4							Std. Deviation	0.0306	0.07461	0.05118	0.1937
																	Number of values (total)	143							Std. Error of Mean	0.005326	0.0118	0.008652	0.03273
[truncated: 41 more columns]
