# Supplementary material for: Miro1-dependent mitochondrial dynamics in parvalbumin interneurons
Source: eLife. 2021 Jun 30;10:e65215. doi: 10.7554/eLife.65215 (PMC8294849; doi:10.7554/eLife.65215)
Supplement: Figure 5—figure supplement 2—source data 1. [file elife-65215-fig5-figsupp2-data1.xlsx]

## Sheet: Fig5 FigSup2A
Figure 5 - Figure Supplement 2A - Husbandry Behaviour (% of shredded Nestlet)
WT	KO			Miro1(+/+)	Miro1(Δ/Δ)		Unpaired t-test
Miro1(+/+)	Miro1(Δ/Δ)		Number of values	9	8			Table Analyzed	Fig5 FigSup2A Husbandry Behaviour
17.0213	47.9263
16.7742	22.9906		Minimum	7.759	3.356			Column B	Miro1(Δ/Δ)
22.8883	39.372		Maximum	97.48	64.84			vs.	vs.
7.75862	26.2467		Range	89.72	61.48			Column A	Miro1(+/+)
14.9007	22.268
52.9915	26.8908		Mean	41.29	31.74			Unpaired t test
90.2357	64.8352		Std. Deviation	33.81	18.67			P value	0.4901
51.5625	3.3557		Std. Error of Mean	11.27	6.602			P value summary	ns
97.482								Significantly different (P < 0.05)?	No
				Miro1(+/+)	Miro1(Δ/Δ)			One- or two-tailed P value?	Two-tailed
			Test for normal distribution					t, df	t=0.7075, df=15
			Anderson-Darling test
			A2*	0.6476	0.3036			How big is the difference?
			P value	0.0605	0.4911			Mean of column A	41.29
			Passed normality test (alpha=0.05)?	Yes	Yes			Mean of column B	31.74
			P value summary	ns	ns			Difference between means (B - A) ± SEM	-9.555 ± 13.50
								95% confidence interval	-38.34 to 19.23
			D'Agostino & Pearson test					R squared (eta squared)	0.03229
			K2	1.73	0.7081
			P value	0.4212	0.7018			F test to compare variances
			Passed normality test (alpha=0.05)?	Yes	Yes			F, DFn, Dfd	3.278, 8, 7
			P value summary	ns	ns			P value	0.1354
								P value summary	ns
			Shapiro-Wilk test					Significantly different (P < 0.05)?	No
			W	0.8412	0.9525
			P value	0.0596	0.736			Data analyzed
			Passed normality test (alpha=0.05)?	Yes	Yes			Sample size, column A	9
			P value summary	ns	ns			Sample size, column B	8
			Kolmogorov-Smirnov test
			KS distance	0.2624	0.2274
			P value	0.0742	>0.1000
			Passed normality test (alpha=0.05)?	Yes	Yes
			P value summary	ns	ns
			Number of values	9	8

## Sheet: Fig5 FigSup2B
Figure 5 - Figure Supplement 2B - Motor Coordination and Learning (RPM)
WT	KO															Multiple t-test per row
Miro1(+/+)	Miro1(Δ/Δ)				Miro1(+/+)					Miro1(Δ/Δ)							Discovery?	P value	Mean of Miro1(+/+)	Mean of Miro1(Δ/Δ)	Difference	SE of difference	t ratio	df	q value
34.68	25.76			Trial 1	27.4	16.96	28.6	22.6	26.8	21.76	11.92	22.12	22.48	27.16		Trial 1	No	0.332573	24.47	21.09	3.384	3.281	1.031	8	0.842995
19.6	16.8			Trial 2	36.64	19.6	38.68	22.48	40	32.2	16.6	30.64	36.76	40		Trial 2	No	0.968545	31.48	31.24	0.24	5.899	0.04068	8	0.978231
35.76	30.92			Trial 3	40	22.24	40	40	40	23.32	21.88	40	40	40		Trial 3	No	0.556433	36.45	33.04	3.408	5.553	0.6137	8	0.842995
28.36	33.08
35.6	35.72
	Miro1(+/+)	Miro1(Δ/Δ)
Number of values	5	5
Minimum	19.6	16.8
Maximum	35.76	35.72
Range	16.16	18.92
Mean	30.8	28.46
Std. Deviation	6.966	7.472
Std. Error of Mean	3.115	3.342
Shapiro-Wilk test
W	0.8035	0.9209
P value	0.0865	0.5358
Passed normality test (alpha=0.05)?	Yes	Yes
P value summary	ns	ns
Kolmogorov-Smirnov test
KS distance	0.3112	0.2292
P value	>0.1000	>0.1000
Passed normality test (alpha=0.05)?	Yes	Yes
P value summary	ns	ns
Number of values	5	5
Unpaired t-test
	Table Analyzed	Fig5 FigSup2B rotatod mean RPM
	Column B	Miro1(Δ/Δ)
	vs.	vs.
	Column A	Miro1(+/+)
	Unpaired t test
	P value	0.6218
	P value summary	ns
	Significantly different (P < 0.05)?	No
	One- or two-tailed P value?	Two-tailed
	t, df	t=0.5131, df=8
	How big is the difference?
	Mean of column A	30.8
	Mean of column B	28.46
	Difference between means (B - A) ± SEM	-2.344 ± 4.569
	95% confidence interval	-12.88 to 8.191
	R squared (eta squared)	0.03186
	F test to compare variances
	F, DFn, Dfd	1.151, 4, 4
	P value	0.895
	P value summary	ns
	Significantly different (P < 0.05)?	No
	Data analyzed
	Sample size, column A	5
	Sample size, column B	5

## Sheet: Fig5 FigSup2C
Figure 5 - Figure Supplement 2C - % correct entries in T-maze (short term memory)
WT	KO			Miro1(+/+)	Miro1(Δ/Δ)		Unpaired t-test
Miro1(+/+)	Miro1(Δ/Δ)		Number of values	8	7			Table Analyzed	Fig5 FigSup2C Tmaze %correct entries
62.5	37.5
62.5	62.5		Minimum	37.5	37.5			Column B	Miro1(Δ/Δ)
62.5	75		Maximum	87.5	87.5			vs.	vs.
37.5	62.5		Range	50	50			Column A	Miro1(+/+)
62.5	87.5
37.5	75		Mean	60.94	62.5			Unpaired t test
87.5	37.5		Std. Deviation	16.95	19.09			P value	0.8692
75			Std. Error of Mean	5.994	7.217			P value summary	ns
								Significantly different (P < 0.05)?	No
			Shapiro-Wilk test					One- or two-tailed P value?	Two-tailed
			W	0.8816	0.8964			t, df	t=0.1680, df=13
			P value	0.1953	0.31
			Passed normality test (alpha=0.05)?	Yes	Yes			How big is the difference?
			P value summary	ns	ns			Mean of column A	60.94
								Mean of column B	62.5
			Kolmogorov-Smirnov test					Difference between means (B - A) ± SEM	1.563 ± 9.302
			KS distance	0.2867	0.2143			95% confidence interval	-18.53 to 21.66
			P value	0.0517	>0.1000			R squared (eta squared)	0.002166
			Passed normality test (alpha=0.05)?	Yes	Yes
			P value summary	ns	ns			F test to compare variances
								F, DFn, Dfd	1.269, 6, 7
			Number of values	8	7			P value	0.755
								P value summary	ns
								Significantly different (P < 0.05)?	No
								Data analyzed
								Sample size, column A	8
								Sample size, column B	7

## Sheet: Fig5 FigSup2E
Figure 5 - Figure Supplement 2E - Average velocity in open field (mm/s)
WT	KO
Miro1(+/+)	Miro1(Δ/Δ)			Miro1(+/+)	Miro1(Δ/Δ)		Unpaired t-test with Welch's correction
34.53	27.73		Number of values	9	9			Table Analyzed	Fig5 FigSup2E average velocity
43.67	53.23
53.11	51.62		Minimum	30.72	22.81			Column B	Miro1(Δ/Δ)
38.88	56.64		Maximum	53.11	90.21			vs.	vs.
30.72	46.03		Range	22.39	67.4			Column A	Miro1(+/+)
39.79	22.81
36.11	51.03		Mean	38.87	51.46			Unpaired t test with Welch's correction
42.16	90.21		Std. Deviation	7.02	19.68			P value	0.1008
30.88	63.88		Std. Error of Mean	2.34	6.561			P value summary	ns
								Significantly different (P < 0.05)?	No
				Miro1(+/+)	Miro1(Δ/Δ)			One- or two-tailed P value?	Two-tailed
			Test for normal distribution					Welch-corrected t, df	t=1.808, df=10.00
			Anderson-Darling test
			A2*	0.2552	0.3795			How big is the difference?
			P value	0.6329	0.3223			Mean of column A	38.87
			Passed normality test (alpha=0.05)?	Yes	Yes			Mean of column B	51.46
			P value summary	ns	ns			Difference between means (B - A) ± SEM	12.59 ± 6.966
								95% confidence interval	-2.928 to 28.11
			D'Agostino & Pearson test					R squared (eta squared)	0.2463
			K2	2.264	1.49
			P value	0.3225	0.4748			F test to compare variances
			Passed normality test (alpha=0.05)?	Yes	Yes			F, DFn, Dfd	7.862, 8, 8
			P value summary	ns	ns			P value	0.0086
								P value summary	**
			Shapiro-Wilk test					Significantly different (P < 0.05)?	Yes
			W	0.9342	0.9308
			P value	0.5219	0.4887			Data analyzed
			Passed normality test (alpha=0.05)?	Yes	Yes			Sample size, column A	9
			P value summary	ns	ns			Sample size, column B	9
			Kolmogorov-Smirnov test
			KS distance	0.136	0.1741
			P value	>0.1000	>0.1000
			Passed normality test (alpha=0.05)?	Yes	Yes
			P value summary	ns	ns
			Number of values	9	9

## Sheet: Fig5 FigSup2F
Figure 5 - Figure Supplement 2F - Distance travelled in open field (mm)
WT	KO			Miro1(+/+)	Miro1(Δ/Δ)		Unpaired t test with Welch's correction
Miro1(+/+)	Miro1(Δ/Δ)		Number of values	9	9			Table Analyzed	Fig5 FigSup2F OF distance travelled
22259.2	18263.1
28846	33971.8		Minimum	19529	14868			Column B	Miro1(Δ/Δ)
33833.7	33303.8		Maximum	33834	57199			vs.	vs.
24731.7	35468.7		Range	14305	42331			Column A	Miro1(+/+)
19528.6	29585.2
25477.5	14867.6		Mean	25107	33029			Unpaired t test with Welch's correction
23645.6	33301.3		Std. Deviation	4493	12345			P value	0.1003
27453	57198.9		Std. Error of Mean	1498	4115			P value summary	ns
20183.4	41297.8							Significantly different (P < 0.05)?	No
				Miro1(+/+)	Miro1(Δ/Δ)			One- or two-tailed P value?	Two-tailed
			Test for normal distribution					Welch-corrected t, df	t=1.809, df=10.08
			Anderson-Darling test
			A2*	0.1921	0.4088			How big is the difference?
			P value	0.8526	0.2697			Mean of column A	25107
			Passed normality test (alpha=0.05)?	Yes	Yes			Mean of column B	33029
			P value summary	ns	ns			Difference between means (B - A) ± SEM	7922 ± 4379
								95% confidence interval	-1825 to 17669
			D'Agostino & Pearson test					R squared (eta squared)	0.245
			K2	1.331	1.4
			P value	0.5141	0.4966			F test to compare variances
			Passed normality test (alpha=0.05)?	Yes	Yes			F, DFn, Dfd	7.549, 8, 8
			P value summary	ns	ns			P value	0.0098
								P value summary	**
			Shapiro-Wilk test					Significantly different (P < 0.05)?	Yes
			W	0.9571	0.9269
			P value	0.7674	0.4528			Data analyzed
			Passed normality test (alpha=0.05)?	Yes	Yes			Sample size, column A	9
			P value summary	ns	ns			Sample size, column B	9
			Kolmogorov-Smirnov test
			KS distance	0.1338	0.1994
			P value	>0.1000	>0.1000
			Passed normality test (alpha=0.05)?	Yes	Yes
			P value summary	ns	ns
			Number of values	9	9

## Sheet: Fig5 FigSup2G
Figure 5 - Figure Supplement 2G - % time spent at distanced away from the center of the open field box
																					Multiple t-test per row
Distance from the center (mm)	Miro1(+/+)										Miro1(Δ/Δ)										Distance from the center (mm)	Discovery?	P value	Mean of Miro1(+/+)	Mean of Miro1(Δ/Δ)	Difference	SE of difference	t ratio	df	q value
50	0.83	2.26	1.46	14.3	16.45	0.72	3.2	7.83	8	0.27	0.78	11.52	0.23	1.63	3.5	8.05	3	1.08			50	No	0.47045	5.532	3.724	1.808	2.446	0.7393	16	0.929869
100	2.8	4.99	3.12	29.4	28.42	1.25	14.3	20.05	26.58	0.62	1.5	8.84	1.84	3.18	41.6	13.4	10.7	5.1			100	No	0.693997	13.15	10.77	2.383	5.948	0.4006	16	0.929869
150	6.98	30.72	10.03	29.65	25.38	2.99	17.17	14.9	24.58	0.93	4.89	29.03	4.28	4.96	36.83	13.77	12.63	9.67			150	No	0.741551	16.33	14.51	1.826	5.44	0.3356	16	0.929869
200	19.32	35.41	26.8	19.27	25.1	9.79	31.47	16.97	28.58	7.72	19.54	29.1	26.53	26.7	15.57	21.82	18.37	19.48			200	No	0.97884	22.04	22.14	-0.09575	3.554	0.02694	16	0.988628
250	45.97	20.36	34.8	7.08	3.58	43.33	22	22.08	9.92	53.97	44.22	21.96	43.77	36.22	1.98	22.85	27.28	30.4			250	No	0.767219	26.31	28.59	-2.276	7.559	0.3011	16	0.929869
300	24.1	6.25	25.96	0.3	1.07	42.03	11.87	18.17	2.33	36.5	29.07	6.93	23.36	28.08	0.52	20.12	28.02	34.27			300	No	0.503624	16.86	21.3	-4.438	6.487	0.6842	16	0.929869
