# Supplementary material for: Miro1-dependent mitochondrial dynamics in parvalbumin interneurons
Source: eLife. 2021 Jun 30;10:e65215. doi: 10.7554/eLife.65215 (PMC8294849; doi:10.7554/eLife.65215)
Supplement: Figure 5—source data 1. [file elife-65215-fig5-data1.xlsx]

## Sheet: Figure 5B
Figure 5B - sEPSC mean inter event interval (s)
WT	KO
Miro1(+/+)	Miro1(Δ/Δ)			Miro1(+/+)	Miro1(Δ/Δ)		Mann Whitney test
0.0200379	0.0283456		Number of values	7	10			Table Analyzed	Fig5B - sEPSC IEI
0.0201714	0.0128554
0.0257611	0.00991416		Minimum	0.01409	0.009914			Column B	Miro1(Δ/Δ)
0.0140948	0.0110439		Maximum	0.08806	0.03344			vs.	vs.
0.0880609	0.0334355		Range	0.07397	0.02352			Column A	Miro1(+/+)
0.0381689	0.0103645
0.0229312	0.0137379		Mean	0.03275	0.01634			Mann Whitney test
	0.0153089		Std. Deviation	0.0255	0.007988			P value	0.025
	0.0128367		Std. Error of Mean	0.009638	0.002526			Exact or approximate P value?	Exact
	0.0155554							P value summary	*
				Miro1(+/+)	Miro1(Δ/Δ)			Significantly different (P < 0.05)?	Yes
			Test for normal distribution					One- or two-tailed P value?	Two-tailed
			Anderson-Darling test					Sum of ranks in column A,B	86 , 67
			A2*	N too small	1.155			Mann-Whitney U	12
			P value		0.0027
			Passed normality test (alpha=0.05)?		No			Difference between medians
			P value summary		**			Median of column A	0.02293, n=7
								Median of column B	0.01330, n=10
			D'Agostino & Pearson test					Difference: Actual	-0.009635
			K2	N too small	6.826			Difference: Hodges-Lehmann	-0.00974
			P value		0.0329
			Passed normality test (alpha=0.05)?		No
			P value summary		*
			Shapiro-Wilk test
			W	0.703	0.7472
			P value	0.004	0.0033
			Passed normality test (alpha=0.05)?	No	No
			P value summary	**	**
			Kolmogorov-Smirnov test
			KS distance	0.3222	0.3391
			P value	0.0269	0.0018
			Passed normality test (alpha=0.05)?	No	No
			P value summary	*	**
			Number of values	7	10

## Sheet: Figure 5C
Figure 5C - sEPSC median amplitude (pA)
WT	KO
Miro1(+/+)	Miro1(Δ/Δ)			Miro1(+/+)	Miro1(Δ/Δ)		Unpaired t test with Welch's correction
-137.549	-163.79		Number of values	7	10			Table Analyzed	Fig5C - sEPSC amplitude
-108.831	-181.769
-145.635	-293.446		Minimum	-154.2	-293.4			Column B	Miro1(Δ/Δ)
-107.679	-244.201		Maximum	-107.7	-111			vs.	vs.
-108.049	-208.053		Range	46.51	182.4			Column A	Miro1(+/+)
-154.186	-129.186
-145.506	-111.049		Mean	-129.6	-188.2			Unpaired t test with Welch's correction
	-152.712		Std. Deviation	20.63	54.24			P value	0.0088
	-186.568		Std. Error of Mean	7.798	17.15			P value summary	**
	-211.309							Significantly different (P < 0.05)?	Yes
				Miro1(+/+)	Miro1(Δ/Δ)			One- or two-tailed P value?	Two-tailed
			Test for normal distribution					Welch-corrected t, df	t=3.109, df=12.32
			Anderson-Darling test
			A2*	N too small	0.1599			How big is the difference?
			P value		0.924			Mean of column A	-129.6
			Passed normality test (alpha=0.05)?		Yes			Mean of column B	-188.2
			P value summary		ns			Difference between means (B - A) ± SEM	-58.57 ± 18.84
								95% confidence interval	-99.51 to -17.64
			D'Agostino & Pearson test					R squared (eta squared)	0.4397
			K2	N too small	0.8489
			P value		0.6541			F test to compare variances
			Passed normality test (alpha=0.05)?		Yes			F, DFn, Dfd	6.911, 9, 6
			P value summary		ns			P value	0.0288
								P value summary	*
			Shapiro-Wilk test					Significantly different (P < 0.05)?	Yes
			W	0.8121	0.975
			P value	0.0539	0.9332			Data analyzed
			Passed normality test (alpha=0.05)?	Yes	Yes			Sample size, column A	7
			P value summary	ns	ns			Sample size, column B	10
			Kolmogorov-Smirnov test
			KS distance	0.2719	0.1351
			P value	>0.1000	>0.1000
			Passed normality test (alpha=0.05)?	Yes	Yes
			P value summary	ns	ns
			Number of values	7	10

## Sheet: Figure 5F
Figure 5F - Frequency (Hz)
WT	HET	KO
Miro1(+/+)	Miro1(+/Δ)	Miro1(Δ/Δ)			Miro1(+/+)	Miro1(+/Δ)	Miro1(Δ/Δ)		Table Analyzed	Fig5F frequency						Number of families	1
32.4426	39.5869	35.9016		Number of values	12	23	20		Data sets analyzed	A-C						Number of comparisons per family	3
30.9311	37.5574	36.3049														Alpha	0.05
32.1213	35.718	36.2557		Minimum	27.05	29.37	29.3		ANOVA summary
31.6951	39.4197	48.4066		Maximum	33.09	39.59	48.41		F	11.58						Tukey's multiple comparisons test	Mean Diff.	95.00% CI of diff.	Significant?	Summary	Adjusted P Value
31.3148	36.9574	40.1574		Range	6.039	10.21	19.11		P value	<0.0001						Miro1(+/+) vs. Miro1(+/Δ)	-3.858	-6.613 to -1.102	Yes	**	0.0039	A-B
33.0852	35.3213	39.8066							P value summary	****						Miro1(+/+) vs. Miro1(Δ/Δ)	-5.617	-8.442 to -2.791	Yes	****	<0.0001	A-C
33.0197	37.1541	38.3148		Mean	31.26	35.12	36.88		Significant diff. among means (P < 0.05)?	Yes						Miro1(+/Δ) vs. Miro1(Δ/Δ)	-1.759	-4.125 to 0.6067	No	ns	0.1816	B-C
27.0459	36.2393	37.8		Std. Deviation	1.922	2.744	4.159		R squared	0.3081
29.4984	33.0426	38.9672		Std. Error of Mean	0.5548	0.5721	0.9301									Test details	Mean 1	Mean 2	Mean Diff.	SE of diff.	n1	n2	q	DF
28.6262	31.6361	32.9639							Brown-Forsythe test							Miro1(+/+) vs. Miro1(+/Δ)	31.26	35.12	-3.858	1.142	12	23	4.777	52
32.7443	29.3738	38.5344			Miro1(+/+)	Miro1(+/Δ)	Miro1(Δ/Δ)		F (DFn, DFd)	2.174 (2, 52)						Miro1(+/+) vs. Miro1(Δ/Δ)	31.26	36.88	-5.617	1.171	12	20	6.783	52
32.5869	31.259	36.9377		Test for normal distribution					P value	0.124						Miro1(+/Δ) vs. Miro1(Δ/Δ)	35.12	36.88	-1.759	0.9806	23	20	2.537	52
	32.4951	38.4439		Anderson-Darling test					P value summary	ns
	39.1639	30.1705		A2*	0.6767	0.1827	0.3651		Are SDs significantly different (P < 0.05)?	No
	33.482	35.5738		P value	0.0572	0.9003	0.4016
	36.2492	34.7377		Passed normality test (alpha=0.05)?	Yes	Yes	Yes		Bartlett's test
	35.7541	41.282		P value summary	ns	ns	ns		Bartlett's statistic (corrected)	8.035
	37.4852	34.2557							P value	0.018
	34.8393	33.4098		D'Agostino & Pearson test					P value summary	*
	34.2	29.3		K2	4.079	0.4435	5.275		Are SDs significantly different (P < 0.05)?	Yes
	33.4557			P value	0.1301	0.8011	0.0716
	35.4492			Passed normality test (alpha=0.05)?	Yes	Yes	Yes		ANOVA table	SS	DF	MS	F (DFn, DFd)	P value
	31.8525			P value summary	ns	ns	ns		Treatment (between columns)	238.2	2	119.1	F (2, 52) = 11.58	P<0.0001
									Residual (within columns)	534.9	52	10.29
				Shapiro-Wilk test					Total	773.2	54
				W	0.8593	0.9759	0.9456
				P value	0.0479	0.8268	0.3053		Data summary
				Passed normality test (alpha=0.05)?	No	Yes	Yes		Number of treatments (columns)	3
				P value summary	*	ns	ns		Number of values (total)	55
				Kolmogorov-Smirnov test
				KS distance	0.1822	0.09489	0.1151
				P value	>0.1000	>0.1000	>0.1000
				Passed normality test (alpha=0.05)?	Yes	Yes	Yes
				P value summary	ns	ns	ns
				Number of values	12	23	20

## Sheet: Figure 5G
Figure 5G - Peak Power (log Norm.)
WT	HET	KO
Miro1(+/+)	Miro1(+/Δ)	Miro1(Δ/Δ)			Miro1(+/+)	Miro1(+/Δ)	Miro1(Δ/Δ)		Table Analyzed	Fig5G gamma peak power						Number of families	1
3.79643	3.1863	3.89766		Number of values	12	23	20		Data sets analyzed	A-C						Number of comparisons per family	3
3.8599	3.64058	3.49167														Alpha	0.05
3.84104	3.60915	3.56681		Minimum	2.886	2.374	2.656		ANOVA summary
3.89305	4.2421	3.9091		Maximum	4.628	4.973	4.29		F	0.5654						Tukey's multiple comparisons test	Mean Diff.	95.00% CI of diff.	Significant?	Summary	Adjusted P Value
4.35897	3.66008	3.42624		Range	1.743	2.599	1.634		P value	0.5716						Miro1(+/+) vs. Miro1(+/Δ)	0.008849	-0.4221 to 0.4398	No	ns	0.9986	A-B
4.62807	3.53934	3.97535							P value summary	ns						Miro1(+/+) vs. Miro1(Δ/Δ)	0.1552	-0.2867 to 0.5971	No	ns	0.6756	A-C
3.71563	2.37372	4.28994		Mean	3.789	3.78	3.634		Significant diff. among means (P < 0.05)?	No						Miro1(+/Δ) vs. Miro1(Δ/Δ)	0.1463	-0.2237 to 0.5163	No	ns	0.6089	B-C
3.35816	3.30027	3.58739		Std. Deviation	0.4394	0.5594	0.4632		R squared	0.02128
2.88556	4.0707	2.96477		Std. Error of Mean	0.1268	0.1166	0.1036									Test details	Mean 1	Mean 2	Mean Diff.	SE of diff.	n1	n2	q	DF
3.72532	3.26758	4.17681							Brown-Forsythe test							Miro1(+/+) vs. Miro1(+/Δ)	3.789	3.78	0.008849	0.1786	12	23	0.07006	52
3.85866	4.04283	3.88494			Miro1(+/+)	Miro1(+/Δ)	Miro1(Δ/Δ)		F (DFn, DFd)	0.8548 (2, 52)						Miro1(+/+) vs. Miro1(Δ/Δ)	3.789	3.634	0.1552	0.1832	12	20	1.198	52
3.54434	4.19738	3.78509		Test for normal distribution					P value	0.4312						Miro1(+/Δ) vs. Miro1(Δ/Δ)	3.78	3.634	0.1463	0.1534	23	20	1.349	52
	3.21163	2.84463		Anderson-Darling test					P value summary	ns
	3.58578	2.65585		A2*	0.5394	0.286	0.427		Are SDs significantly different (P < 0.05)?	No
	3.60268	3.76475		P value	0.1304	0.5925	0.2832
	3.29962	3.38828		Passed normality test (alpha=0.05)?	Yes	Yes	Yes		Bartlett's test
	4.31176	3.07145		P value summary	ns	ns	ns		Bartlett's statistic (corrected)	1.116
	3.91579	4.23872							P value	0.5724
	4.57926	3.99551		D'Agostino & Pearson test					P value summary	ns
	4.30076	3.75678		K2	1.551	1.294	1.748		Are SDs significantly different (P < 0.05)?	No
	3.88386			P value	0.4604	0.5236	0.4172
	4.14417			Passed normality test (alpha=0.05)?	Yes	Yes	Yes		ANOVA table	SS	DF	MS	F (DFn, DFd)	P value
	4.97257			P value summary	ns	ns	ns		Treatment (between columns)	0.2845	2	0.1423	F (2, 52) = 0.5654	P=0.5716
									Residual (within columns)	13.08	52	0.2516
				Shapiro-Wilk test					Total	13.37	54
				W	0.9298	0.9727	0.9428
				P value	0.3779	0.7522	0.2712		Data summary
				Passed normality test (alpha=0.05)?	Yes	Yes	Yes		Number of treatments (columns)	3
				P value summary	ns	ns	ns		Number of values (total)	55
				Kolmogorov-Smirnov test
				KS distance	0.2395	0.1065	0.1549
				P value	0.0557	>0.1000	>0.1000
				Passed normality test (alpha=0.05)?	Yes	Yes	Yes
				P value summary	ns	ns	ns
				Number of values	12	23	20

## Sheet: Figure 5H
Figure 5H - Power Area (log Norm.)
WT	HET	KO
Miro1(+/+)	Miro1(+/Δ)	Miro1(Δ/Δ)			Miro1(+/+)	Miro1(+/Δ)	Miro1(Δ/Δ)		Table Analyzed	Fig5H gamma power area						Number of families	1
4.38039	3.88052	4.4262		Number of values	12	23	20		Data sets analyzed	A-C						Number of comparisons per family	3
4.2105	4.28964	3.98898														Alpha	0.05
4.41495	4.2668	4.25867		Minimum	3.5	3.13	3.332		ANOVA summary
4.37989	4.90032	4.70721		Maximum	5.295	5.509	4.838		F	0.3236						Tukey's multiple comparisons test	Mean Diff.	95.00% CI of diff.	Significant?	Summary	Adjusted P Value
4.9184	4.26051	4.04263		Range	1.795	2.379	1.505		P value	0.725						Miro1(+/+) vs. Miro1(+/Δ)	-0.08578	-0.4884 to 0.3168	No	ns	0.8649	A-B
5.2945	3.9901	4.68497							P value summary	ns						Miro1(+/+) vs. Miro1(Δ/Δ)	0.02492	-0.3879 to 0.4377	No	ns	0.9884	A-C
3.93416	3.12994	4.779		Mean	4.303	4.388	4.278		Significant diff. among means (P < 0.05)?	No						Miro1(+/Δ) vs. Miro1(Δ/Δ)	0.1107	-0.2350 to 0.4564	No	ns	0.7213	B-C
3.75045	4.0135	4.30849		Std. Deviation	0.4804	0.5032	0.4173		R squared	0.01229
3.49999	4.53626	3.77968		Std. Error of Mean	0.1387	0.1049	0.09332									Test details	Mean 1	Mean 2	Mean Diff.	SE of diff.	n1	n2	q	DF
4.10492	3.87316	4.5142							Brown-Forsythe test							Miro1(+/+) vs. Miro1(+/Δ)	4.303	4.388	-0.08578	0.1669	12	23	0.727	52
4.43785	4.5942	4.61937			Miro1(+/+)	Miro1(+/Δ)	Miro1(Δ/Δ)		F (DFn, DFd)	0.2022 (2, 52)						Miro1(+/+) vs. Miro1(Δ/Δ)	4.303	4.278	0.02492	0.1711	12	20	0.206	52
4.30655	4.83672	4.52009		Test for normal distribution					P value	0.8176						Miro1(+/Δ) vs. Miro1(Δ/Δ)	4.388	4.278	0.1107	0.1433	23	20	1.093	52
	3.90549	3.64438		Anderson-Darling test					P value summary	ns
	4.21335	3.33222		A2*	0.3484	0.2855	0.3978		Are SDs significantly different (P < 0.05)?	No
	4.29457	4.49305		P value	0.413	0.5943	0.3343
	3.99975	4.11894		Passed normality test (alpha=0.05)?	Yes	Yes	Yes		Bartlett's test
	4.87013	3.80338		P value summary	ns	ns	ns		Bartlett's statistic (corrected)	0.7015
	4.62171	4.8376							P value	0.7042
	4.80311	4.62314		D'Agostino & Pearson test					P value summary	ns
	5.00352	4.07367		K2	1.269	1.364	1.738		Are SDs significantly different (P < 0.05)?	No
	4.49135			P value	0.5303	0.5056	0.4193
	4.65153			Passed normality test (alpha=0.05)?	Yes	Yes	Yes		ANOVA table	SS	DF	MS	F (DFn, DFd)	P value
	5.50918			P value summary	ns	ns	ns		Treatment (between columns)	0.1421	2	0.07106	F (2, 52) = 0.3236	P=0.7250
									Residual (within columns)	11.42	52	0.2196
				Shapiro-Wilk test					Total	11.56	54
				W	0.954	0.9712	0.944
				P value	0.6954	0.718	0.2855		Data summary
				Passed normality test (alpha=0.05)?	Yes	Yes	Yes		Number of treatments (columns)	3
				P value summary	ns	ns	ns		Number of values (total)	55
				Kolmogorov-Smirnov test
				KS distance	0.2226	0.1094	0.147
				P value	>0.1000	>0.1000	>0.1000
				Passed normality test (alpha=0.05)?	Yes	Yes	Yes
				P value summary	ns	ns	ns
				Number of values	12	23	20

## Sheet: Figure 5I
Figure 5I - 50% width of FFT distribution
WT	HET	KO
Miro1(+/+)	Miro1(+/Δ)	Miro1(Δ/Δ)			Miro1(+/+)	Miro1(+/Δ)	Miro1(Δ/Δ)		Table Analyzed	Fig5I 50% fit						Number of families	1
5.83762	8.23162	6.13339		Number of values	12	23	20		Data sets analyzed	A-C						Number of comparisons per family	3
2.94925	11.2444	4.36926														Alpha	0.05
7.33147	9.46778	11.5328		Minimum	1.241	1.69	1.828		ANOVA summary
3.85403	9.97478	16.658		Maximum	8.602	12.8	16.66		F	5.407						Tukey's multiple comparisons test	Mean Diff.	95.00% CI of diff.	Significant?	Summary	Adjusted P Value
5.77448	7.8914	6.85885		Range	7.361	11.11	14.83		P value	0.0074						Miro1(+/+) vs. Miro1(+/Δ)	-2.58	-5.392 to 0.2308	No	ns	0.0781	A-B
8.37364	4.25641	10.7281							P value summary	**						Miro1(+/+) vs. Miro1(Δ/Δ)	-3.925	-6.808 to -1.043	Yes	**	0.0051	A-C
1.24111	12.798	5.32663		Mean	4.967	7.548	8.892		Significant diff. among means (P < 0.05)?	Yes						Miro1(+/Δ) vs. Miro1(Δ/Δ)	-1.345	-3.759 to 1.069	No	ns	0.3775	B-C
2.60058	11.3882	5.0613		Std. Deviation	2.432	2.878	4.036		R squared	0.1722
3.67532	4.16891	12.7269		Std. Error of Mean	0.702	0.6001	0.9025									Test details	Mean 1	Mean 2	Mean Diff.	SE of diff.	n1	n2	q	DF
2.86592	3.44244	2.33027							Brown-Forsythe test							Miro1(+/+) vs. Miro1(+/Δ)	4.967	7.548	-2.58	1.165	12	23	3.132	52
6.50028	6.56008	14.241			Miro1(+/+)	Miro1(+/Δ)	Miro1(Δ/Δ)		F (DFn, DFd)	3.403 (2, 52)						Miro1(+/+) vs. Miro1(Δ/Δ)	4.967	8.892	-3.925	1.195	12	20	4.646	52
8.60203	7.02836	11.3931		Test for normal distribution					P value	0.0409						Miro1(+/Δ) vs. Miro1(Δ/Δ)	7.548	8.892	-1.345	1	23	20	1.901	52
	8.43948	12.1876		Anderson-Darling test					P value summary	*
	6.32173	7.54098		A2*	0.3238	0.1799	0.3397		Are SDs significantly different (P < 0.05)?	Yes
	9.8041	11.1936		P value	0.4752	0.9051	0.4623
	7.54051	10.6569		Passed normality test (alpha=0.05)?	Yes	Yes	Yes		Bartlett's test
	7.05338	12.1745		P value summary	ns	ns	ns		Bartlett's statistic (corrected)	4.09
	9.52764	6.85867							P value	0.1294
	1.69006	8.04918		D'Agostino & Pearson test					P value summary	ns
	10.9867	1.82845		K2	1.655	0.4967	0.6117		Are SDs significantly different (P < 0.05)?	No
	6.44974			P value	0.4372	0.7801	0.7365
	4.98794			Passed normality test (alpha=0.05)?	Yes	Yes	Yes		ANOVA table	SS	DF	MS	F (DFn, DFd)	P value
	4.34043			P value summary	ns	ns	ns		Treatment (between columns)	115.8	2	57.89	F (2, 52) = 5.407	P=0.0074
									Residual (within columns)	556.8	52	10.71
				Shapiro-Wilk test					Total	672.5	54
				W	0.94	0.9814	0.9659
				P value	0.4976	0.9292	0.6678		Data summary
				Passed normality test (alpha=0.05)?	Yes	Yes	Yes		Number of treatments (columns)	3
				P value summary	ns	ns	ns		Number of values (total)	55
				Kolmogorov-Smirnov test
				KS distance	0.1764	0.0955	0.169
				P value	>0.1000	>0.1000	>0.1000
				Passed normality test (alpha=0.05)?	Yes	Yes	Yes
				P value summary	ns	ns	ns
				Number of values	12	23	20

## Sheet: Figure 5K
Figure 5K - % time spent in open, closed and center of EPM
EPM	Miro1(+/+)									Miro1(Δ/Δ)										Center Miro1(+/+)	Center Miro1(Δ/Δ)	Open Miro1(+/+)	Open Miro1(Δ/Δ)	Closed Miro1(+/+)	Closed Miro1(Δ/Δ)		Unpaired t test				Mann Whitney test				Unpaired t test
Center	43	20.8	50.6	16.3667	9.58488	14.0333	29.9333	13.3667	24.0667	49.7925	25.2599	37.4667	27.8508	20.9667	13.1	42.2432	17.479		Number of values	9	8	9	8	9	8			Table Analyzed	Fig5K EPM			Table Analyzed	Fig5K EPM			Table Analyzed	Fig5K EPM
Open	0.8	0.766667	2.26667	3.46667	6.85116	10.3333	13.4667	6.2	7.5	6.50069	14.6916	11.8	18.6856	7.7	23.4	15.269	49.042
Closed	56.2	78.4333	47.1333	80.1667	83.564	75.6333	56.6	80.4333	68.4333	43.7068	60.0485	50.7333	53.4636	71.3333	63.5	42.4878	33.479		Minimum	9.585	13.1	0.7667	6.501	47.13	33.48			Column B	Center Miro1(Δ/Δ)			Column D	Open Miro1(Δ/Δ)			Column F	Closed Miro1(Δ/Δ)
																			Maximum	50.6	49.79	13.47	49.04	83.56	71.33			vs.	vs.			vs.	vs.			vs.	vs.
																			Range	41.02	36.69	12.7	42.54	36.43	37.85			Column A	Center Miro1(+/+)			Column C	Open Miro1(+/+)			Column E	Closed Miro1(+/+)
																			Mean	24.64	29.27	5.739	18.39	69.62	52.34			Unpaired t test				Mann Whitney test				Unpaired t test
																			Std. Deviation	14.09	12.79	4.355	13.56	13.2	12.4			P value	0.491			P value	0.0037			P value	0.0143
																			Std. Error of Mean	4.698	4.52	1.452	4.794	4.399	4.383			P value summary	ns			Exact or approximate P value?	Exact			P value summary	*
																												Significantly different (P < 0.05)?	No			P value summary	**			Significantly different (P < 0.05)?	Yes
																				Center Miro1(+/+)	Center Miro1(Δ/Δ)	Open Miro1(+/+)	Open Miro1(Δ/Δ)	Closed Miro1(+/+)	Closed Miro1(Δ/Δ)			One- or two-tailed P value?	Two-tailed			Significantly different (P < 0.05)?	Yes			One- or two-tailed P value?	Two-tailed
																			Test for normal distribution									t, df	t=0.7060, df=15			One- or two-tailed P value?	Two-tailed			t, df	t=2.772, df=15
																			Anderson-Darling test													Sum of ranks in column C,D	52 , 101
																			A2*	0.4454	0.2101	0.2485	0.7122	0.5331	0.1336			How big is the difference?				Mann-Whitney U	7			How big is the difference?
																			P value	0.2148	0.7854	0.6575	0.0375	0.1223	0.9621			Mean of column A	24.64							Mean of column E	69.62
																			Passed normality test (alpha=0.05)?	Yes	Yes	Yes	No	Yes	Yes			Mean of column B	29.27			Difference between medians				Mean of column F	52.34
																			P value summary	ns	ns	ns	*	ns	ns			Difference between means (B - A) ± SEM	4.631 ± 6.559			Median of column C	6.200, n=9			Difference between means (F - E) ± SEM	-17.28 ± 6.234
																												95% confidence interval	-9.349 to 18.61			Median of column D	14.98, n=8			95% confidence interval	-30.57 to -3.990
																			D'Agostino & Pearson test									R squared (eta squared)	0.03216			Difference: Actual	8.78			R squared (eta squared)	0.3387
																			K2	1.938	0.775	0.6228	11.63	1.692	0.1267							Difference: Hodges-Lehmann	9.301
																			P value	0.3795	0.6788	0.7324	0.003	0.429	0.9386			F test to compare variances								F test to compare variances
																			Passed normality test (alpha=0.05)?	Yes	Yes	Yes	No	Yes	Yes			F, DFn, Dfd	1.215, 8, 7							F, DFn, Dfd	1.133, 8, 7
																			P value summary	ns	ns	ns	**	ns	ns			P value	0.8103							P value	0.8822
																												P value summary	ns							P value summary	ns
																			Shapiro-Wilk test									Significantly different (P < 0.05)?	No							Significantly different (P < 0.05)?	No
																			W	0.8916	0.9558	0.9376	0.7928	0.8756	0.9857
																			P value	0.2071	0.7692	0.5565	0.0239	0.141	0.9856			Data analyzed								Data analyzed
																			Passed normality test (alpha=0.05)?	Yes	Yes	Yes	No	Yes	Yes			Sample size, column A	9							Sample size, column E	9
																			P value summary	ns	ns	ns	*	ns	ns			Sample size, column B	8							Sample size, column F	8
																			Kolmogorov-Smirnov test
																			KS distance	0.1829	0.1692	0.1435	0.2412	0.2312	0.132
																			P value	>0.1000	>0.1000	>0.1000	>0.1000	>0.1000	>0.1000
																			Passed normality test (alpha=0.05)?	Yes	Yes	Yes	Yes	Yes	Yes
																			P value summary	ns	ns	ns	ns	ns	ns
																			Number of values	9	8	9	8	9	8
